# Supplementary material for: Photocatalytic prins-like indole addition of tryptophol C2 with aldehydes and ketones
Source: Royal Society of Chemistry journal article supplement (doi:10.1039/d5ra09558a), 2026-05-12
Supplement: d5ra09558a1.pdf [file d5ra09558a1.pdf]

## *Electronic Supplementary Information (ESI)*

### **Photocatalytic Prins-like indole addition between tryptophol C2 with aldehydes and ketones**

Lanxiang Liu,<sup>a,b,c</sup> Yunfeng Tao,<sup>b</sup> Menghan Chu,<sup>b</sup> Xiaojian Zhou,<sup>b</sup> Guanben Du,<sup>b</sup> Bei Zhou,<sup>a,b\*</sup>  
Jun Lin<sup>a\*</sup>

\* Corresponding authors, E-mail: [linjun@ynu.edu.cn](mailto:linjun@ynu.edu.cn) (Prof. Jun Lin, ORCID: 0000-0002-2087-6013), [beizhou@swfu.edu.cn](mailto:beizhou@swfu.edu.cn) (Prof. Bei Zhou, ORCID: 0000-0001-7193-4116).

*a. Key Laboratory of Medicinal Chemistry for Natural Resource, Ministry of Education; Yunnan Key Laboratory of Research and Development for Natural Products; School of Pharmacy, School of Chemical Science and Technology, Yunnan University, Kunming 650091, China.*

*b. Yunnan Provincial Key Laboratory of Wood and Bamboo Biomass Materials, Key Laboratory of Forest Resources Conservation and Utilization in the Southwest Mountains of China (Ministry of Education), International Joint-Research Center for Bio-Materials (Ministry of Science and Technology), Key Laboratory of State Forestry and Grassland Administration on Highly-Efficient Utilization of Forestry Biomass Resources in Southwest China, College of Materials and Chemical Engineering, Southwest Forestry University, Kunming 650224, China.*

*c. Yunnan Key Laboratory of Breeding and Utilization of Resource Insects, Key Laboratory of Protection and Utilization of Insects (National Forestry and Grassland Administration), Research Center of Engineering and Technology of Characteristic Forest Resources (National Forestry and Grassland Administration), Institute of Highland Forest Science, Chinese Academy of Forestry, Kunming 650233, China.*

# Contents

|                                                          |           |
|----------------------------------------------------------|-----------|
| <b>1. General experiment.....</b>                        | <b>3</b>  |
| <b>1.1 Materials and Experiments .....</b>               | <b>3</b>  |
| <b>1.2 Characterizations and Analysis .....</b>          | <b>4</b>  |
| <b>1.3 Photocatalysis experiments device.....</b>        | <b>5</b>  |
| <b>2. Photocatalysis experiments.....</b>                | <b>6</b>  |
| <b>2.1 General photocatalytic synthesis .....</b>        | <b>6</b>  |
| <b>2.2 Data and NMR spectra products. ....</b>           | <b>7</b>  |
| <b>3. Computational experiments data.....</b>            | <b>55</b> |
| <b>4. X-ray crystal structure experiments data .....</b> | <b>59</b> |

# 1. General experiment

## 1.1 Materials and Experiments

Photocatalysis experiments were performed in an argon or oxygen atmosphere. Chemical reagents (including purified water) were obtained from commercial suppliers (*Sigma-Aldrich*, *Adamas*, Shanghai Titan Technology Co., LTD, *Adamas et al.*) and used without further purification. Reactions were monitored by thin-layer chromatography (TLC) on a 0.25 mm silica gel GF254 plate (Merck Silica gel 60-F254) using UV light as a visualizing agent and an ethanolic solution of phosphomolybdic acid and cerium sulfate and heat as a developing agent. Silica gel (300-400 mesh) was used for normal flash column chromatography. Indole and its related derivate products were isolated by column chromatography with neutral alumina ( $\text{Al}_2\text{O}_3$ , Merck KGaA, 70–230 mesh, and pH = 6.8–7.8). Ethyl acetate and petroleum ether were used as the eluent solvents. Yields refer to chromatographically and spectroscopically homogeneous materials unless otherwise noted. LED lights (including every 5W 10W 20W blue LEDs with different wavenumbers) were purchased from the Changchun Institute of Optics, Fine Mechanics and Physics, Chinese Academy of Sciences, and Changchun Changguang Chenpu Technology Co., LTD.

## 1.2 Characterizations and Analysis

$^1\text{H-NMR}$ , and  $^{13}\text{C-NMR}$  were recorded with Bruker Advance (400 and 500 MHz) spectrometers. All chemical shifts were reported as  $\delta$  values in parts per million (ppm) and coupling constants ( $J$ ) in Hz. Tetramethylsilane (TMS) was used as the internal standard for  $\text{CDCl}_3$  (7.26 ppm for  $^1\text{H}$ , 77.00 ppm for  $^{13}\text{C}$ ).

**X-ray crystal structure:** Single block crystals of **target molecules** were used as supplied. A suitable crystal with dimensions  $0.20 \times 0.15 \times 0.10 \text{ mm}^3$  was selected and mounted on a Bruker APEX-II CCD diffractometer.

**Mass spectra:** (1) **HR-MS (ESI)** was taken on AB QSTAR Pulsar mass spectrometer or Agilent LC/MSD TOF mass spectrometer. HR-MS data were recorded via electron impact mass spectrometry using a time-of-flight analyzer. (2) **GC-MS** was performed on a Hewlett-Packard 6890 N gas chromatograph (equipped with the same HP-5MS capillary column) under identical operating conditions used in Mass Spectral Library by R. P. Adams (Adams, 2007).

### 1.3 Photocatalysis experiments device

The reaction was carried out as follows: a one, two or three-neck reaction quartz flask was fitted with a magnetic stirring bar. Septa capped the other two necks for injections and an atmosphere line. Following evacuation in a vacuum and flushing with argon or oxygen three times, the reaction vessel was charged with a solution of reactants. The reaction conditions were 25 °C and used an argon or oxygen balloon atmosphere, with water or other organic reagents as the solvent.

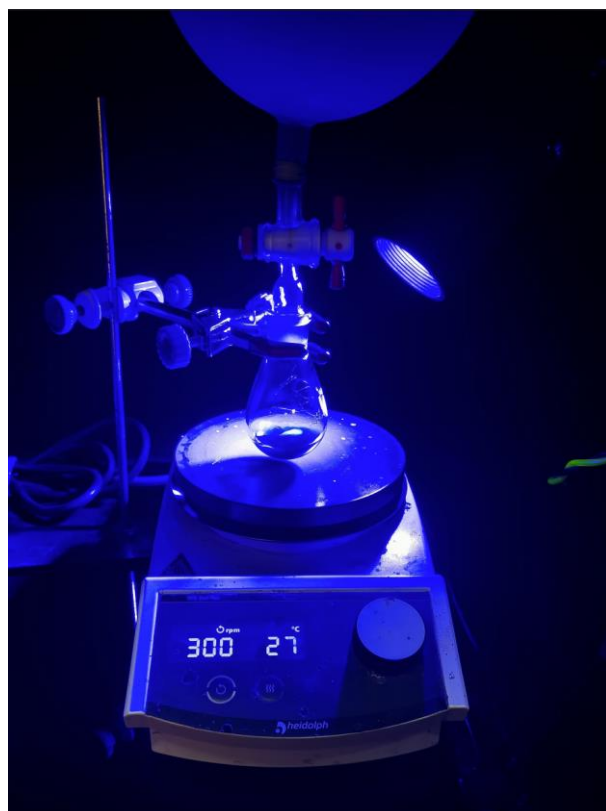

*Figure S1.* Photocatalysis experiment device.

## 2. Photocatalysis experiments

### 2.1 General photocatalytic synthesis

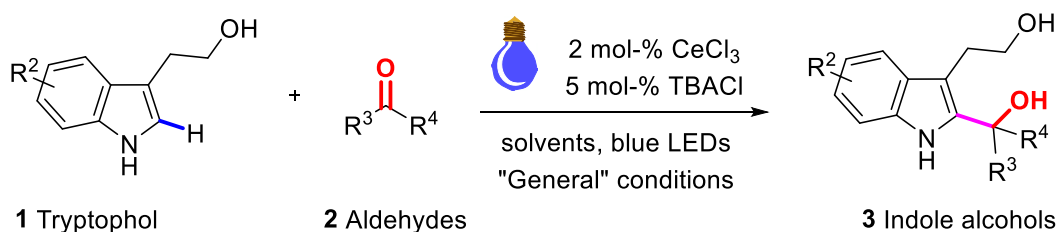

**Figure S2.** Photocatalytic synthesis of radical Aldol reaction

In an oven-dried quartz flask (50 mL) equipped with a stir bar, tryptophol (250 mg, 1.6 mmol, 1.0 equiv.), aldehydes (1.0 equiv.), cerium (III) chloride (19.11 mg, 0.08 mmol, 0.05 equiv.), tetrabutylammonium chloride (43.09 mg, 0.16 mmol, 0.1 equiv.), 2,2,2-trichloro-ethanol (23.18 mg, 0.16 mmol, 0.1 equiv.) and dichloromethane (DCM, 20.0 mL) were combined and added. The reaction was conducted under an argon atmosphere using an Ar balloon. The reaction mixture was stirred and illuminated by blue LED lights under room temperature for 15 h cooling by a fan. TLC, UV light as a visualizing agent, the reaction was monitored, and an ethanolic solution of phosphomolybdic acid, cerium sulfate, and heat as a developing agent. When the reactant material was no longer decreased, the solution was extracted with DCM (6×10 mL) and H<sub>2</sub>O (3×10 mL). The combined organic layer was dried with Na<sub>2</sub>SO<sub>4</sub> and filtered. The solvent was removed with a rotary evaporator. The pure product was obtained by flash chromatography on neutral alumina (Al<sub>2</sub>O<sub>3</sub>, Merck KGaA, 70–230 mesh, and pH = 6.8–7.8) using ethyl acetate and petroleum ether (1:15, vol/vol) as the eluent solvents. The target product was obtained. All the products' isolated yields were calculated by column chromatography.

## 2.2 Data and NMR spectra products.

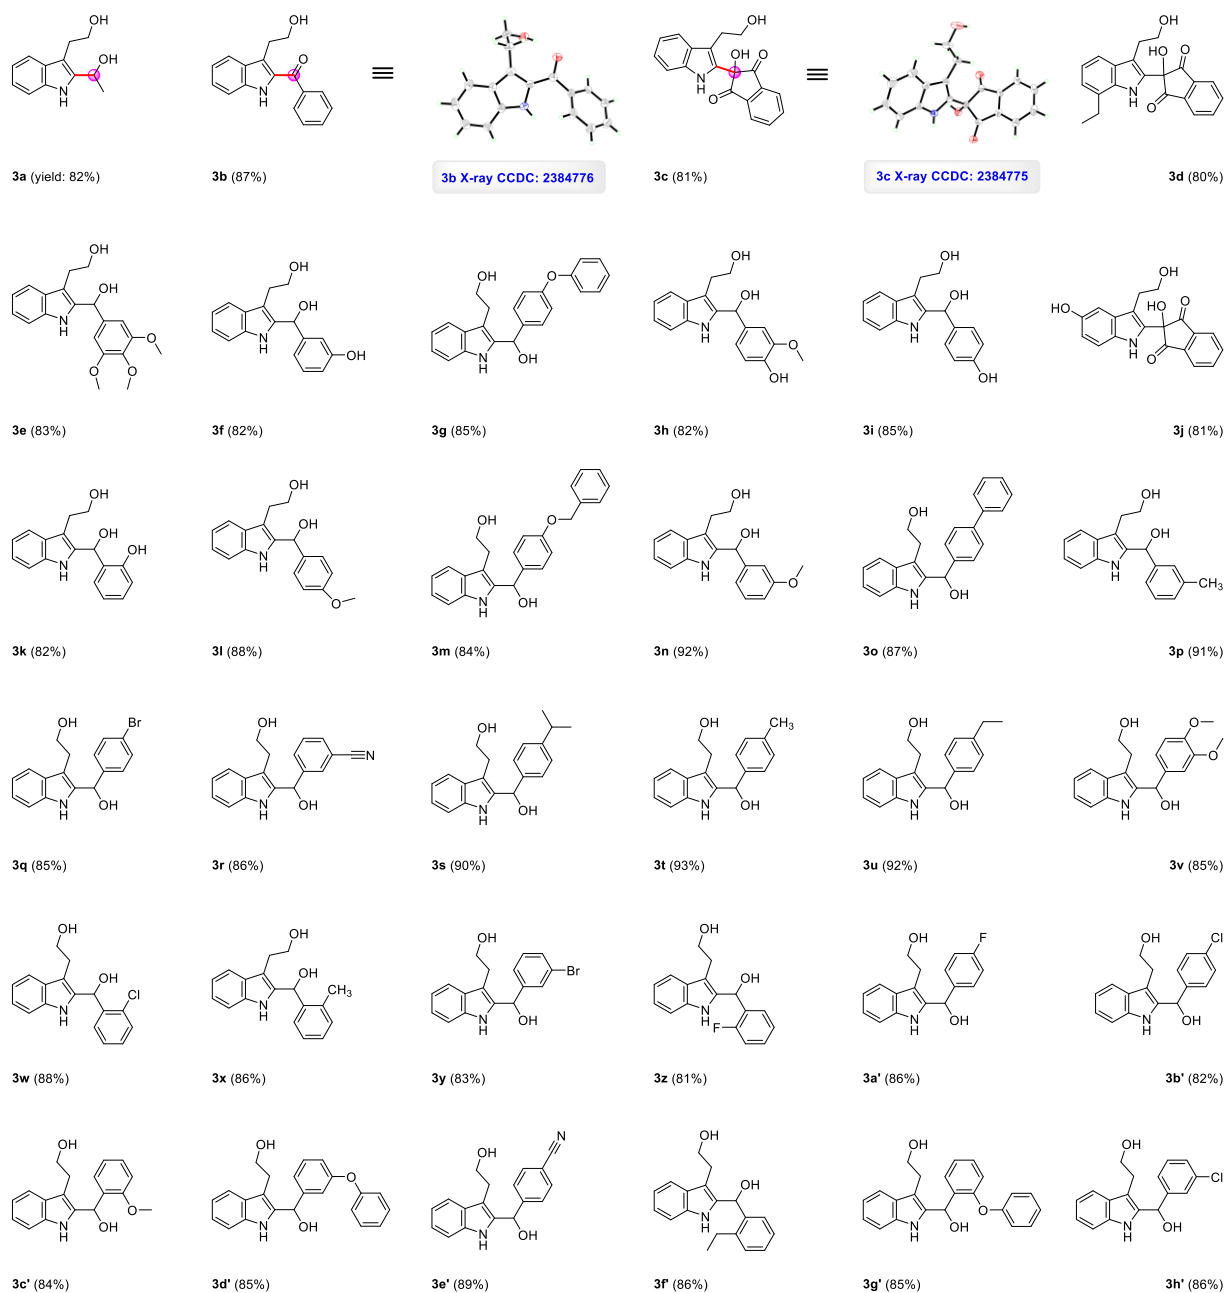

**Figure S3.** Products of indole intermolecular reaction with aldehydes and ketones.

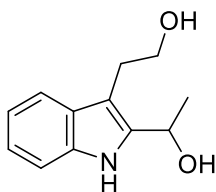

**Name: 1-(3-(2-hydroxyethyl)-1H-indol-2-yl)ethan-1-ol**

TLC: Petroleum ether/EtOAc = 5/1,  $R_f$  = 0.5, Yield: 80%,  $^1\text{H NMR}$  (500 MHz,  $\text{CDCl}_3$ )  $\delta$  ppm: 1.79-1.81 (d, 1H,  $J$  = 7.45 Hz), 2.87-2.93 (ss, 0.5H,  $J$  = 32.55 Hz), 3.07-3.10 (m, 2H), 3.88-3.92 (m, 2H), 4.88-4.92 (q, 0.5H,  $J$  = 22.2 Hz), 7.07-7.15 (m, 2H), 7.23-7.26 (t, 1H,  $J$  = 16.25 Hz), 7.50-7.51 (d, 1H,  $J$  = 7.7 Hz).  $^{13}\text{C NMR}$  (125 MHz,  $\text{CDCl}_3$ )  $\delta$  ppm: 20.0, 27.4, 30.1, 62.6, 107.7, 110.9, 118.3, 119.5, 121.7, 128.5, 135.6, 138.3. **HRMS (ESI<sup>+</sup>)**: calculated for  $\text{C}_{12}\text{H}_{16}\text{NO}_2$ ,  $[\text{M}+\text{H}]^+$  206.7716, found 206.7609.

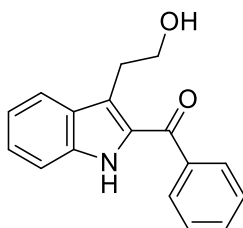

**Name: (3-(2-hydroxyethyl)-1H-indol-2-yl)(phenyl)methanone**

TLC: Petroleum ether/EtOAc = 8/1,  $R_f$  = 0.6, Yield: 87%,  $^1\text{H NMR}$  (500 MHz,  $\text{CDCl}_3$ )  $\delta$  ppm: 3.20-3.21 (d, 1H,  $J$  = 5.25 Hz), 3.78 (s, 1H), 7.185-7.19 (d, 1H,  $J$  = 2.35 Hz), 7.38 (s, 2H), 7.48 (s, 2H), 7.58-7.69 (m, 4H), 8.94-8.97 (d, 1H,  $J$  = 17.4 Hz).  $^{13}\text{C NMR}$  (125 MHz,  $\text{CDCl}_3$ )  $\delta$  ppm: 28.2, 63.5, 112.4, 120.7, 120.8, 121.0, 121.1, 122.8, 126.6, 127.1, 128.0, 128.6, 128.7, 128.9, 129.2, 129.3, 132.0, 132.5, 136.8, 138.5. **HRMS (ESI<sup>+</sup>)**: calculated for  $\text{C}_{17}\text{H}_{16}\text{NO}_2$ ,  $[\text{M}+\text{H}]^+$  266.1176, found 266.1170.

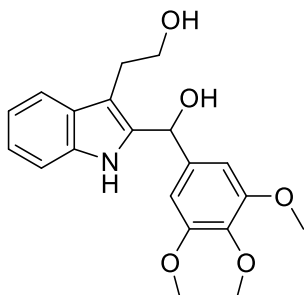

**Name: 2-(2-(hydroxy(3,4,5-trimethoxyphenyl)methyl)-1H-indol-3-yl)ethan-1-ol**

TLC: Petroleum ether/EtOAc = 15/1,  $R_f$  = 0.8, Yield: 83%,  $^1\text{H NMR}$  (500 MHz,  $\text{CDCl}_3$ )  $\delta$  ppm: 1.58 (s, 1H), 2.80-2.83 (d, 1H,  $J$  = 15.25 Hz), 3.11-3.17 (m, 1H), 3.79 (s, 6H), 3.83 (s, 3H), 3.97-4.02 (t, 1H,  $J$  = 11 Hz), 4.37-4.40 (q, 1H,  $J$  = 16.25 Hz), 5.72 (s, 1H), 6.57 (s, 2H), 7.12-7.19 (m, 2H), 7.29-7.31 (d, 1H,  $J$  = 7.9 Hz), 7.56-7.57 (d, 1H,  $J$  = 7.55 Hz), 7.84 (s, 1H).  $^{13}\text{C NMR}$  (125 MHz,  $\text{CDCl}_3$ )  $\delta$  ppm: 22.3, 56.1, 60.8, 65.5, 105.4, 108.7, 111.1, 118.3, 119.6, 122.0, 127.1, 133.6, 135.1, 136.1, 153.5. **HRMS (ESI<sup>+</sup>)**: calculated for  $\text{C}_{20}\text{H}_{24}\text{NO}_5$ ,  $[\text{M}+\text{H}]^+$  358.1649, found 358.1657.

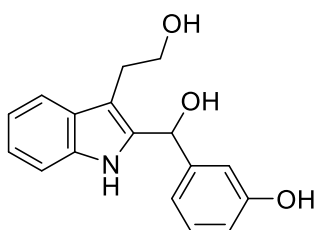

**Name: 3-(hydroxy(3-(2-hydroxyethyl)-1H-indol-2-yl)methyl)phenol**

TLC: Petroleum ether/EtOAc = 12/1,  $R_f$  = 0.8, Yield: 82%,  $^1\text{H NMR}$  (500 MHz, MeOD)  $\delta$  ppm: 2.82-2.85 (d, 1H,  $J$  = 15.15 Hz), 2.97-3.02 (m, 1H), 3.33 (s, 1H), 3.95-3.97 (m, 1H), 4.19-4.22 (m, 1H), 4.63 (s, 1H), 5.79 (s, 1H), 6.77-6.80 (t, 2H,  $J$  = 12.75 Hz), 6.86-6.87 (d, 1H,  $J$  = 7.55 Hz), 7.00-7.03 (t, 1H,  $J$  = 14.8 Hz), 7.05-7.08 (t, 1H,  $J$  = 14.95 Hz), 7.20-7.23 (t, 1H,  $J$  = 15.55 Hz), 7.25-7.27 (d, 1H,  $J$  = 8.05 Hz), 7.47-7.49 (d, 1H,  $J$  = 7.75 Hz).  $^{13}\text{C NMR}$  (125 MHz, MeOD)  $\delta$  ppm: 25.9, 67.5, 79.9, 111.2, 114.6, 119.1, 121.3, 122.4, 130.6, 133.1, 137.1, 140.6, 145.3, 161.2. **HRMS (ESI<sup>+</sup>)**: calculated for  $\text{C}_{17}\text{H}_{18}\text{NO}_3$ ,  $[\text{M}+\text{H}]^+$  284.1281, found 284.1273.

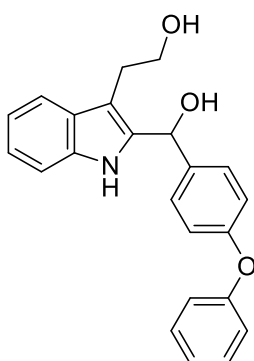

**Name: 2-(2-(hydroxy(4-phenoxyphenyl)methyl)-1H-indol-3-yl)ethan-1-ol**

TLC: Petroleum ether/EtOAc = 15/1,  $R_f$  = 0.8, Yield: 85%,  $^1\text{H NMR}$  (500 MHz,  $\text{CDCl}_3$ )  $\delta$  ppm: 2.80-2.84 (m, 1H), 3.06-3.12 (m, 1H), 3.95-4.00 (m, 1H), 4.30-4.34 (m, 1H), 5.77 (s, 1H), 6.98-7.02 (m, 4H), 7.09-7.16 (m, 3H), 7.23-7.24 (d, 1H,  $J$  = 4.15 Hz), 7.31-7.34 (m, 4H), 7.51 (s, 1H), 7.54-7.56 (d, 1H,  $J$  = 7.35 Hz).  $^{13}\text{C NMR}$  (125 MHz,  $\text{CDCl}_3$ )  $\delta$  ppm: 22.3, 64.9, 75.6,

109.0, 111.0, 118.4, 118.9, 119.1, 119.7, 122.0, 123.6, 127.0, 129.8, 130.1, 133.6, 134.2, 136.1, 156.9, 158.0. **HRMS (ESI<sup>+</sup>)**: calculated for C<sub>23</sub>H<sub>22</sub>NO<sub>3</sub>, [M+H]<sup>+</sup> 360.1594, found 360.1588

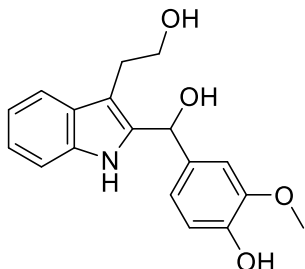

**Name: 4-(hydroxy(3-(2-hydroxyethyl)-1H-indol-2-yl)methyl)-2-methoxyphenol**

TLC: Petroleum ether/EtOAc = 12/1, R<sub>f</sub> = 0.8, Yield: 82%, <sup>1</sup>H NMR (500 MHz, CDCl<sub>3</sub>) δ ppm: 2.78-2.83 (m, 1H), 3.08-3.15 (m, 1H), 3.82 (s, 3H), 3.96-4.01 (m, 1H), 4.33-4.37 (m, 1H), 5.70-5.72 (d, 1H, J = 12.9 Hz), 6.84-6.844 (d, 1H, J = 1.6 Hz), 6.88-6.92 (m, 2H), 7.11-7.18 (m, 2H), 7.24-7.26 (d, 1H, J = 6.95 Hz), 7.48 (s, 1H), 7.54-7.56 (d, 1H, J = 8.3 Hz). <sup>13</sup>C NMR (125 MHz, CDCl<sub>3</sub>) δ ppm: 22.3, 56.0, 65.2, 108.7, 110.5, 111.1, 114.2, 118.3, 119.7, 121.7, 121.9, 127.1, 131.4, 134.0, 136.0, 146.3, 147.0. **HRMS (ESI<sup>+</sup>)**: calculated for C<sub>18</sub>H<sub>20</sub>NO<sub>4</sub>, [M+H]<sup>+</sup> 314.1837, found 314.1829.

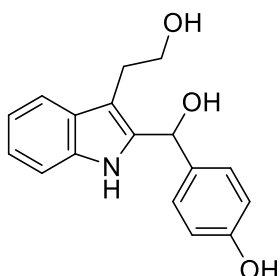

**Name: 4-(hydroxy(3-(2-hydroxyethyl)-1H-indol-2-yl)methyl)phenol**

TLC: Petroleum ether/EtOAc = 12/1, R<sub>f</sub> = 0.6, Yield: 85%, <sup>1</sup>H NMR (500 MHz, CDCl<sub>3</sub>) δ ppm: 2.81-2.84 (d, 1H, J = 15.45 Hz), 3.07-3.12 (m, 1H), 3.97-4.01 (m, 1H), 4.30-4.32 (m, 1H), 5.77 (s, 1H), 6.75-6.77 (d, 1H, J = 8.25 Hz), 6.92-6.94 (d, 2H, J = 8.4 Hz), 7.11-7.18 (m, 1H), 7.54-7.56 (d, 1H, J = 7.3 Hz), 7.68 (s, 1H), 7.76-7.78 (d, 2H, J = 8.4 Hz), 9.78 (s, 1H). **HRMS (ESI<sup>+</sup>)**: calculated for C<sub>17</sub>H<sub>18</sub>NO<sub>3</sub>, [M+H]<sup>+</sup> 284.1280, found 284.1286.

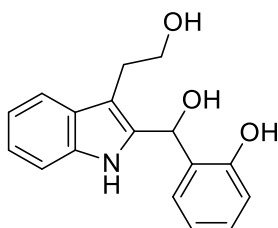

**Name: 2-(hydroxy(3-(2-hydroxyethyl)-1H-indol-2-yl)methyl)phenol**

TLC: Petroleum ether/EtOAc = 15/1,  $R_f$  = 0.8, Yield: 82%,  $^1\text{H NMR}$  (500 MHz,  $\text{CDCl}_3$ )  $\delta$  ppm: 3.25 (s, 2H), 3.94 (s, 2H), 6.93-6.96 (t, 1H,  $J$  = 14.8 Hz), 7.07-7.08 (d, 1H,  $J$  = 8.3 Hz), 7.17 (s, 1H), 7.34 (s, 2H), 7.50-7.53 (t, 1H,  $J$  = 15.2 Hz), 7.69-7.71 (d, 1H,  $J$  = 7.95 Hz), 7.77-7.78 (d, 1H,  $J$  = 8.3 Hz), 8.77 (s, 1H), 11.51 (s, 1H). **HRMS (ESI<sup>+</sup>)**: calculated for  $\text{C}_{17}\text{H}_{18}\text{NO}_3$ ,  $[\text{M}+\text{H}]^+$  284.1281, found 284.1289.

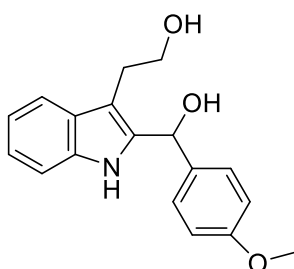

**Name: 2-(2-(hydroxy(4-methoxyphenyl)methyl)-1H-indol-3-yl)ethan-1-ol**

TLC: Petroleum ether/EtOAc = 15/1,  $R_f$  = 0.8, Yield: 88%,  $^1\text{H NMR}$  (500 MHz,  $\text{CDCl}_3$ )  $\delta$  ppm: 2.80-2.85 (m, 1H), 3.07-3.13 (m, 1H), 3.81 (s, 3H), 3.96-4.01 (m, 1H), 4.29-4.33 (m, 1H), 5.76 (s, 1H), 6.89-6.92 (d, 2H,  $J$  = 14.25 Hz), 7.12-7.18 (m, 1H), 7.23-7.25 (d, 2H,  $J$  = 7.25 Hz), 7.28-7.30 (d, 2H,  $J$  = 8.6 Hz), 7.49 (s, 1H), 7.56-7.57 (d, 1H,  $J$  = 7.25 Hz).  $^{13}\text{C NMR}$  (125 MHz,  $\text{CDCl}_3$ )  $\delta$  ppm: 22.4, 55.4, 64.8, 75.7, 108.9, 111.0, 114.2, 118.4, 119.7, 121.9, 127.1, 129.9, 131.6, 133.9, 136.0, 160.1. **HRMS (ESI<sup>+</sup>)**: calculated for  $\text{C}_{18}\text{H}_{20}\text{NO}_3$ ,  $[\text{M}+\text{H}]^+$  298.1438, found 298.1432.

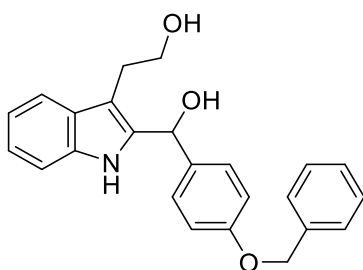

**Name: 2-(2-((4-(benzyloxy)phenyl)(hydroxy)methyl)-1H-indol-3-yl)ethan-1-ol**

TLC: Petroleum ether/EtOAc = 15/1,  $R_f$  = 0.8, Yield: 84%,  $^1\text{H NMR}$  (500 MHz,  $\text{CDCl}_3$ )  $\delta$  ppm: 1.56 (s, 2H), 2.79-2.83 (m, 1H), 3.05-3.12 (m, 1H), 3.95-4.00 (m, 1H), 4.28-4.32 (m, 1H), 5.07 (s, 2H), 5.75 (s, 1H), 6.96-6.97 (d, 2H,  $J$  = 8.7 Hz), 7.12-7.17 (m, 2H), 7.22-7.24 (d, 1H,  $J$  = 7.3 Hz), 7.27-7.29 (d, 2H,  $J$  = 8.65 Hz), 7.32-7.33 (d, 1H,  $J$  = 7.15 Hz), 7.36-7.39 (t, 2H,  $J$  = 14.8 Hz), 7.41-7.43 (d, 2H,  $J$  = 7.1 Hz), 7.45 (s, 1H), 7.54-7.56 (d, 1H,  $J$  = 7.3 Hz). **HRMS (ESI<sup>+</sup>)**: calculated for  $\text{C}_{24}\text{H}_{24}\text{NO}_3$ ,  $[\text{M}+\text{H}]^+$  374.1751, found 374.1761.

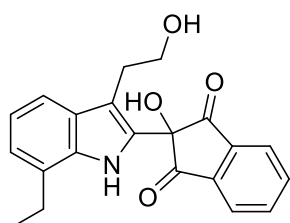

**Name: 2-(7-ethyl-3-(2-hydroxyethyl)-1H-indol-2-yl)-2-hydroxy-1H-indene-1,3(2H)-dione**

TLC: Petroleum ether/EtOAc = 6/1,  $R_f$  = 0.6, Yield: 80%,  $^1\text{H NMR}$  (500 MHz, MeOD)  $\delta$  ppm: 1.30-1.33 (t, 3H,  $J$  = 15.1 Hz), 2.65-2.68 (t, 2H,  $J$  = 15.45 Hz), 2.87-2.92 (q, 2H,  $J$  = 22.7 Hz), 3.31-3.33 (t, 2H,  $J$  = 9.3 Hz), 6.92-6.96 (q, 2H,  $J$  = 19.65 Hz), 7.28-7.30 (q, 1H,  $J$  = 9.05 Hz), 8.03-8.05 (q, 2H,  $J$  = 8.8 Hz), 8.11-8.13 (q, 2H,  $J$  = 8.8 Hz).  $^{13}\text{C NMR}$  (125 MHz, MeOD)  $\delta$  ppm: 13.1, 13.3, 23.5, 27.5, 61.6, 76.1, 110.0, 115.8, 119.3, 121.0, 124.0, 126.8, 128.3, 128.4, 134.6, 136.9, 140.6, 197.7. **HRMS (ESI<sup>+</sup>)**: calculated for  $\text{C}_{21}\text{H}_{20}\text{NO}_4$ ,  $[\text{M}+\text{H}]^+$  350.1387, found 350.1379.

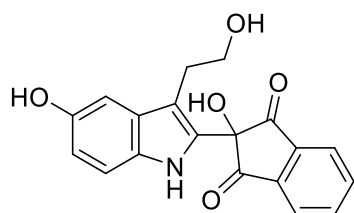

**Name: 2-hydroxy-2-(5-hydroxy-3-(2-hydroxyethyl)-1H-indol-2-yl)-1H-indene-1,3(2H)-dione**

TLC: Petroleum ether/EtOAc = 5/1,  $R_f$  = 0.5, Yield: 81%,  $^1\text{H NMR}$  (500 MHz, MeOD)  $\delta$  ppm: 3.26-3.29 (q, 1H,  $J$  = 14.65 Hz), 3.34 (m, 1H), 3.78-3.82 (m, 1H), 3.86-3.92 (m, 1H), 3.74-3.9 (m, 1H), 6.56-6.57 (d, 1H,  $J$  = 8.65 Hz), 7.17 (s, 1H), 7.25-7.27 (d, 1H,  $J$  = 8.7 Hz), 7.53-7.56 (t, 1H,  $J$  = 15.8 Hz), 7.71-7.73 (d, 1H,  $J$  = 7.7 Hz), 7.80-7.83 (m, 1H), 7.97-7.98 (d, 1H,  $J$  = 7.85 Hz).  $^{13}\text{C NMR}$  (125 MHz, MeOD)  $\delta$  ppm: 28.5, 64.2, 104.4, 108.1, 111.9, 112.3, 114.3, 122.8,

124.,5 125.0, 130.2, 133.4, 134.8, 135.9, 149.4, 151.5, 200.3. **HRMS (ESI<sup>+</sup>)**: calculated for C<sub>19</sub>H<sub>16</sub>NO<sub>5</sub>, [M+H]<sup>+</sup> 338.1023, found 338.1031.

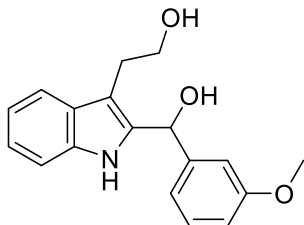

**Name: 2-(2-(hydroxy(3-methoxyphenyl)methyl)-1H-indol-3-yl)ethan-1-ol**

TLC: Petroleum ether/EtOAc = 15/1, R<sub>f</sub> = 0.5, Yield: 92%, **<sup>1</sup>H NMR** (500 MHz, CDCl<sub>3</sub>) δ ppm: 2.80-2.83(q, 1H, J=15 Hz), 3.10-3.11(dt, 1H, J=50 Hz), 3.77(s, 3H), 3.96-4.01(m, 1H), 4.32-4.36(m, 1H), 4.36-4.37(m, 1H), 5.77(s, 1H), 6.89-6.92(m, 2H), 6.96-6.98(d, 1H, J=10 Hz), 7.11-7.17(m, 2H), 7.23-7.25(t, 1H, J=10 Hz), 7.28-7.31(t, 1H, J=10 Hz), 7.40-7.47(m, 1H), 7.54-7.55(t, 1H, J=5 Hz). **<sup>13</sup>C NMR** (125 MHz, CDCl<sub>3</sub>) δ ppm: 22.3, 55.3, 65.1, 76.2, 108.6, 111.0, 113.5, 114.7, 118.4, 119.7, 120.6, 121.9, 130.0, 133.6, 135.3, 136.1, 141.0. **HRMS (ESI<sup>+</sup>)**: calculated for C<sub>18</sub>H<sub>20</sub>NO<sub>3</sub>, [M+H]<sup>+</sup> 298.1438, found 298.1426.

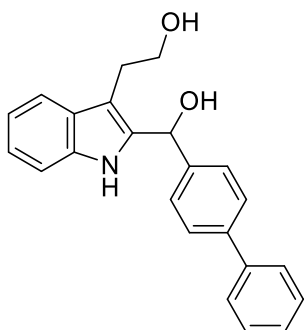

**Name: 2-(2-([1,1'-biphenyl]-4-yl(hydroxy)methyl)-1H-indol-3-yl)ethan-1-ol**

TLC: Petroleum ether/EtOAc = 15/1, R<sub>f</sub> = 0.5., Yield: 87%, **<sup>1</sup>H NMR** (500 MHz, CDCl<sub>3</sub>) δ ppm: 2.86-2.87(m, 1H), 3.12-3.13(dt, 1H, J=2 Hz), 4.01-4.05(m, 1H), 4.34-4.37(m, 1H), 5.86(s, 1H), 7.13-7.19(m, 2H), 7.26(s, 1H), 7.36-7.37(d, 1H, J=7.5 Hz), 7.44-7.46(t, 4H, J=8.5 Hz), 7.57-7.61(m, 5H). **<sup>13</sup>C NMR** (125 MHz, CDCl<sub>3</sub>) δ ppm: 22.3, 64.9, 108.9, 111.0, 118.4, 119.7, 122.0, 127.0, 127.2, 127.5, 127.6, 128.8, 128.9, 133.6, 136.1, 138.4, 141.9. **HRMS (ESI<sup>+</sup>)**: calculated for C<sub>23</sub>H<sub>22</sub>NO<sub>2</sub>, [M+H]<sup>+</sup> 344.1645, found 344.1639.

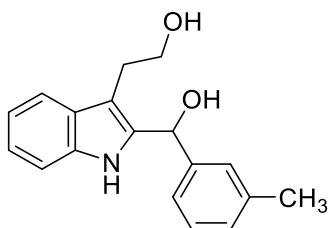

**Name: 2-(2-(hydroxy(m-tolyl)methyl)-1H-indol-3-yl)ethan-1-ol**

TLC: Petroleum ether/EtOAc = 15/1,  $R_f$  = 0.5, Yield: 91%,  $^1\text{H NMR}$  (500 MHz,  $\text{CDCl}_3$ )  $\delta$  ppm: 2.28-2.29(t, 3H,  $J$  = 8.5 Hz), 2.75-2.78(d, 1H,  $J$  = 15.5 Hz), 3.02-3.08(m, 1H), 3.89-3.94(m, 1H), 4.25-4.28(m, 1H), 5.66-5.67(d, 1H,  $J$  = 1.5 Hz), 7.09-7.13(m, 6H), 7.16-7.23(m, 1H), 7.45(s, 1H), 7.51(s, 1H).  $^{13}\text{C NMR}$  (125 MHz,  $\text{CDCl}_3$ )  $\delta$  ppm: 21.5, 22.4, 64.9, 76.9, 77.2, 77.4, 108.7, 111.1, 118.4, 119.7, 121.9, 125.7, 127.1, 128.7, 129.1, 129.8, 133.8, 136.1, 138.7, 139.5. **HRMS (ESI<sup>+</sup>):** calculated for  $\text{C}_{18}\text{H}_{20}\text{NO}_2$ ,  $[\text{M}+\text{H}]^+$  282.1489, found 282.1481.

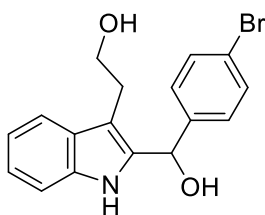

**Name: 2-(2-((4-bromophenyl)(hydroxy)methyl)-1H-indol-3-yl)ethan-1-ol**

TLC: Petroleum ether/EtOAc = 15/1,  $R_f$  = 0.5, Yield: 85%,  $^1\text{H NMR}$  (500 MHz,  $\text{CDCl}_3$ )  $\delta$  ppm: 2.80-2.83(m, 1H), 2.79-2.84(m, 1H), 3.04-3.10(m, 1H), 3.95-3.99(m, 1H), 3.99-4.10(d, 1H,  $J$  = 56.5 Hz), 4.26-4.29(m, 1H), 5.74(s, 1H), 7.12-7.17(m, 2H), 7.22-7.24(q, 3H,  $J$  = 8.5 Hz), 7.44-7.53(m, 2H), 7.54-7.55(d, 1H,  $J$  = 7.5 Hz).  $^{13}\text{C NMR}$  (125 MHz,  $\text{CDCl}_3$ )  $\delta$  ppm: 22.3, 64.8, 75.4, 109.0, 111.1, 118.4, 119.8, 122.2, 123.0, 126.9, 130.1, 131.9, 132.9, 136.1, 138.6. **HRMS (ESI<sup>+</sup>):** calculated for  $\text{C}_{17}\text{H}_{17}\text{BrNO}_2$ ,  $[\text{M}+\text{H}]^+$  346.0437, found 346.0428.

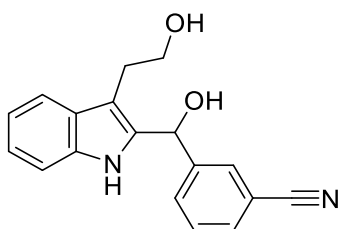

**Name: 3-(hydroxy(3-(2-hydroxyethyl)-1H-indol-2-yl)methyl)benzonitrile**

TLC: Petroleum ether/EtOAc = 10/1,  $R_f$  = 0.5, Yield: 86%,  $^1\text{H NMR}$  (500 MHz,  $\text{CDCl}_3$ )  $\delta$  ppm: 2.84-2.88(m, 1H), 3.07-3.13(m, 1H), 3.97-4.01(m, 1H), 4.27-4.31(m, 1H), 5.84-5.85(t, 1H,  $J$  = 3 Hz), 7.14-7.21(m, 1H), 7.26-7.29(m, 2H), 7.49-7.75(m, 1H), 7.56-7.58(d, 1H,  $J$  = 8 Hz), 7.63-

7.69(m, 3H).  $^{13}\text{C}$  NMR (125 MHz,  $\text{CDCl}_3$ )  $\delta$  ppm: 29.7, 64.8, 75.1, 109.5, 111.1, 113.0, 118.4, 118.6, 120.0, 122.5, 126.8, 129.7, 131.9, 132.0, 132.5, 132.7, 136.2, 141.3. **HRMS (ESI<sup>+</sup>):** calculated for  $\text{C}_{18}\text{H}_{17}\text{N}_2\text{O}_2$ ,  $[\text{M}+\text{H}]^+$  293.1285, found 293.1290.

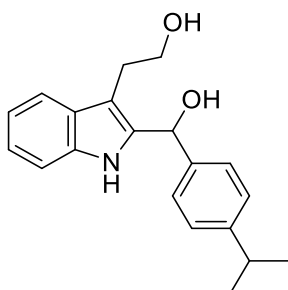

**Name: 2-(2-(hydroxy(4-isopropylphenyl)methyl)-1H-indol-3-yl)ethan-1-ol**

TLC: Petroleum ether/EtOAc = 15/1,  $R_f$  = 0.5, Yield: 90%,  $^1\text{H}$  NMR (500 MHz,  $\text{CDCl}_3$ )  $\delta$  ppm: 1.24-1.2924(m, 6H), 1.54(s, 1H), 2.79-2.85(m, 1H), 2.89-2.94(m, 1H), 3.06-3.13(m, 1H), 3.96-4.00(m, 1H), 4.30-4.34(m, 1H), 5.77-5.78(d, 1H,  $J$ =3.5 Hz), 7.12-7.17(m, 2H), 7.22-7.29(m, 3H), 7.22-7.25(m, 2H), 7.54(s, 1H), 7.55-7.56(d, 1H,  $J$ =7 Hz).  $^{13}\text{C}$  NMR (125 MHz,  $\text{CDCl}_3$ )  $\delta$  ppm: 22.4, 23.9, 23.9, 33.9, 64.9, 75.9, 108.9, 110.9, 118.3, 119.6, 121.9, 126.9, 127.1, 128.5, 133.8, 136.0, 136.8, 149.8. **HRMS (ESI<sup>+</sup>):** calculated for  $\text{C}_{20}\text{H}_{24}\text{NO}_2$ ,  $[\text{M}+\text{H}]^+$  310.1802, found 310.1796.

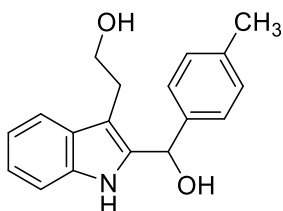

**Name: 2-(2-(hydroxy(p-tolyl)methyl)-1H-indol-3-yl)ethan-1-ol**

TLC: Petroleum ether/EtOAc = 15/1,  $R_f$  = 0.5, Yield: 93%,  $^1\text{H}$  NMR (500 MHz,  $\text{CDCl}_3$ )  $\delta$  ppm: 2.33(s, 3H), 2.76-2.80(m, 1H), 3.04-3.05(m, 1H), 3.90-3.95(m, 1H), 4.24-4.27(m, 1H), 5.70(s, 1H), 7.09-7.12(m, 2H), 7.14-7.15(m, 3H), 7.20-7.22(m, 2H), 7.44(s, 1H), 7.52-7.53(m, 1H).  $^{13}\text{C}$  NMR (125 MHz,  $\text{CDCl}_3$ )  $\delta$  ppm: 21.3, 22.4, 64.7, 76.9, 77.2, 77.4, 108.8, 111.1, 118.4, 119.7, 121.9, 127.1, 128.5, 129.5, 133.9, 136.1, 136.6, 138.8. **HRMS (ESI<sup>+</sup>):** calculated for  $\text{C}_{18}\text{H}_{20}\text{NO}_2$ ,  $[\text{M}+\text{H}]^+$  282.1489, found 282.1480.

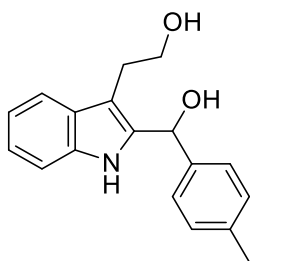

**Name: 2-(2-((4-ethylphenyl)(hydroxy)methyl)-1H-indol-3-yl)ethan-1-ol**

TLC: Petroleum ether/EtOAc = 15/1,  $R_f$  = 0.5, Yield: 92%,  $^1\text{H NMR}$  (500 MHz,  $\text{CDCl}_3$ )  $\delta$  ppm: 1.21-1.24(t, 3H,  $J$ =15 Hz), 2.62-2.66(q, 2H,  $J$ =23 Hz), 2.78-2.81(m, 1H), 3.04-3.10(m, 1H), 3.92-3.97(m, 1H), 4.26-4.30(m, 1H), 5.73(s, 1H), 7.10-7.26(m, 7H), 7.53(s, 1H), 7.53-7.54(d, 1H,  $J$ =6.5 Hz).  $^{13}\text{C NMR}$  (125 MHz,  $\text{CDCl}_3$ )  $\delta$  ppm: 15.6, 22.4, 28.7, 64.8, 75.9, 108.8, 111.0, 118.3, 119.6, 121.9, 127.1, 128.3, 128.6, 133.9, 136.0, 136.7, 145.2. **HRMS (ESI<sup>+</sup>)**: calculated for  $\text{C}_{19}\text{H}_{22}\text{NO}_2$ ,  $[\text{M}+\text{H}]^+$  296.1645, found 296.1655.

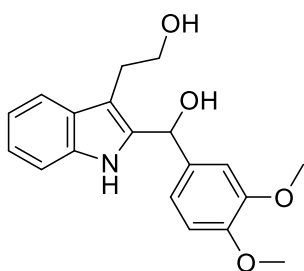

**Name: 2-(2-((3,4-dimethoxyphenyl)(hydroxy)methyl)-1H-indol-3-yl)ethan-1-ol**

TLC: Petroleum ether/EtOAc = 15/1,  $R_f$  = 0.5, Yield: 85%,  $^1\text{H NMR}$  (500 MHz,  $\text{CDCl}_3$ )  $\delta$  ppm: 2.79-2.84(m, 1H), 3.08-3.15(m, 1H), 3.82(s, 3H), 3.89(s, 3H), 3.97-4.01(m, 1H), 4.31-4.37(m, 1H), 5.74-5.75(t, 1H,  $J$ =3.5 Hz), 6.85-6.88(q, 2H,  $J$ =16.5 Hz), 6.92-6.94(m, 1H), 7.13-7.17(m, 2H), 7.25-7.49(m, 2H), 7.55(s, 1H), 7.55-7.57(d, 1H,  $J$ =7.5 Hz).  $^{13}\text{C NMR}$  (125 MHz,  $\text{CDCl}_3$ )  $\delta$  ppm: 22.3, 55.9, 55.9, 65.2, 76.2, 108.8, 110.9, 111.1, 111.2, 118.3, 119.7, 120.9, 121.9, 127.1, 131.9, 133.9, 136.0, 149.4, 149.6. **HRMS (ESI<sup>+</sup>)**: calculated for  $\text{C}_{19}\text{H}_{22}\text{NO}_4$ ,  $[\text{M}+\text{H}]^+$  328.1543, found 328.1539.

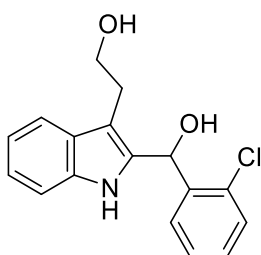

**Name: 2-(2-((2-chlorophenyl)(hydroxy)methyl)-1H-indol-3-yl)ethan-1-ol**

TLC: Petroleum ether/EtOAc = 11/1,  $R_f$  = 0.5, Yield: 88%,  $^1\text{H NMR}$  (500 MHz,  $\text{CDCl}_3$ )  $\delta$  ppm: 2.81-2.86(m, 1H), 3.06-3.09(m, 1H), 3.99-4.04(m, 1H), 4.32-4.36(m, 1H), 6.34(s, 1H), 7.10-7.17(m, 2H), 7.20-7.29(m, 3H), 7.33-7.35(dd, 1H), 7.53-7.55(m, 1H), 7.64(s, 1H).  $^{13}\text{C NMR}$  (125 MHz,  $\text{CDCl}_3$ )  $\delta$  ppm: 22.3, 64.9, 72.0, 108.9, 111.0, 118.3, 119.3, 122.1, 126.8, 127.4, 129.7, 129.8, 129.9, 132.9, 133.1, 135.9, 137.5. **HRMS (ESI<sup>+</sup>)**: calculated for  $\text{C}_{17}\text{H}_{17}\text{ClNO}_2$ ,  $[\text{M}+\text{H}]^+$  302.0942, found 302.0931.

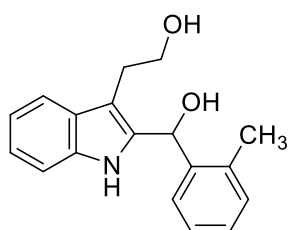

**Name: 2-(2-(hydroxy(o-tolyl)methyl)-1H-indol-3-yl)ethan-1-ol**

TLC: Petroleum ether/EtOAc = 15/1,  $R_f$  = 0.5, Yield: 86%,  $^1\text{H NMR}$  (500 MHz,  $\text{CDCl}_3$ )  $\delta$  ppm: 2.40(s, 3H), 2.82-2.85(m, 1H), 3.03-3.05(m, 1H), 3.94-3.99(m, 1H), 4.24-4.27(m, 1H), 5.99-5.997(t, 1H,  $J=3.5$  Hz), 7.12-7.15(m, 4H), 7.21-7.25(m, 3H), 7.47(s, 1H), 7.54-7.55(m, 1H).  $^{13}\text{C NMR}$  (125 MHz,  $\text{CDCl}_3$ )  $\delta$  ppm: 19.0, 22.4, 64.6, 73.9, 109.1, 111.0, 118.3, 119.7, 121.9, 126.1, 127.1, 128.9, 129.4, 131.2, 133.5, 136.0, 137.1, 137.7. **HRMS (ESI<sup>+</sup>)**: calculated for  $\text{C}_{18}\text{H}_{20}\text{NO}_2$ ,  $[\text{M}+\text{H}]^+$  282.1489, found 282.1475.

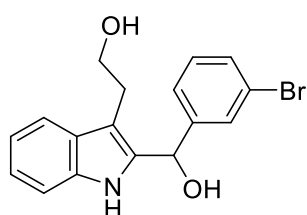

**Name: 2-(2-((3-bromophenyl)(hydroxy)methyl)-1H-indol-3-yl)ethan-1-ol**

TLC: Petroleum ether/EtOAc = 11/1,  $R_f$  = 0.5, Yield: 83%,  $^1\text{H NMR}$  (500 MHz,  $\text{CDCl}_3$ )  $\delta$  ppm: 2.78-2.83(m, 1H), 3.04-3.10(m, 1H), 3.92-3.97(m, 1H), 3.94-3.99(m, 1H), 4.25-4.29(m, 1H), 5.71(s, 1H), 7.11-7.17(m, 2H), 7.21-7.24(t, 2H,  $J=15$  Hz), 7.28-7.29(d, 1H,  $J=8$  Hz), 7.47-7.50(m, 3H), 7.54-7.55(d, 1H,  $J=7.5$  Hz).  $^{13}\text{C NMR}$  (125 MHz,  $\text{CDCl}_3$ )  $\delta$  ppm: 22.3, 64.9, 75.4, 109.0, 111.1, 118.5, 119.8, 122.2, 122.9, 126.9, 127.1, 130.4, 131.4, 132.8, 136.2, 141.9. **HRMS (ESI<sup>+</sup>)**: calculated for  $\text{C}_{17}\text{H}_{17}\text{BrNO}_2$ ,  $[\text{M}+\text{H}]^+$  346.0437, found 346.0440

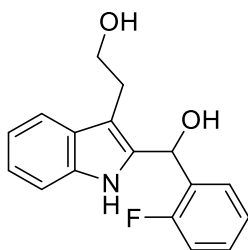

**Name: 2-(2-((2-fluorophenyl)(hydroxy)methyl)-1H-indol-3-yl)ethan-1-ol**

TLC: Petroleum ether/EtOAc = 10/1,  $R_f$  = 0.5, Yield: 81%,  $^1\text{H NMR}$  (500 MHz,  $\text{CDCl}_3$ )  $\delta$  ppm: 2.81-2.85(m, 1H), 3.06-3.12(m, 1H), 3.96-4.01(m, 1H), 4.29-4.33(m, 1H), 5.79(s, 1H), 7.05-7.08(m, 2H), 7.12-7.19(m, 2H), 7.25-7.26(m, 2H), 7.34-7.37(m, 2H), 7.42(s, 1H), 7.55-7.56(d, 1H,  $J=7.5$  Hz).  $^{13}\text{C NMR}$  (125 MHz,  $\text{CDCl}_3$ )  $\delta$  ppm: 22.3, 64.9, 75.4, 109.1, 111.0, 115.7, 115.8, 118.4, 119.8, 122.1, 126.9, 130.3, 130.3, 133.3, 135.4, 135.4, 136.1. **HRMS (ESI<sup>+</sup>):** calculated for  $\text{C}_{17}\text{H}_{17}\text{FNO}_2$ ,  $[\text{M}+\text{H}]^+$  286.1238, found 286.1245.

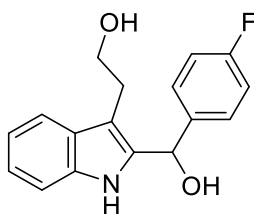

**Name: 2-(2-((4-fluorophenyl)(hydroxy)methyl)-1H-indol-3-yl)ethan-1-ol**

TLC: Petroleum ether/EtOAc = 10/1,  $R_f$  = 0.5, Yield: 86%,  $^1\text{H NMR}$  (500 MHz,  $\text{CDCl}_3$ )  $\delta$  ppm: 2.79-2.84(m, 1H), 3.05-3.11(m, 1H), 3.94-3.99(m, 1H), 4.27-4.31(m, 1H), 5.77(s, 1H), 7.03-7.07(m, 2H), 7.11-7.18(m, 2H), 7.23-7.24(m, 1H), 7.31-7.35(m, 2H), 7.43(s, 1H), 7.54-7.56(d, 1H,  $J=7.5$  Hz).  $^{13}\text{C NMR}$  (125 MHz,  $\text{CDCl}_3$ )  $\delta$  ppm: 22.3, 64.9, 75.4, 109.0, 111.0, 115.7, 115.8, 118.4, 119.8, 122.1, 126.9, 130.3, 130.4, 133.3, 135.4, 135.4, 136.1. **HRMS (ESI<sup>+</sup>):** calculated for  $\text{C}_{17}\text{H}_{17}\text{FNO}_2$ ,  $[\text{M}+\text{H}]^+$  286.1238, found 286.1240.

The signal at  $\delta_{\text{C}}$  164.06-162.09 ppm (d,  $^1J_{\text{C-F}} = 246.25$  Hz) corresponds to the CF carbon, the signal at  $\delta_{\text{C}}$  115.83, 115.66 (d,  $^2J_{\text{C-F}} = 21.25$  Hz) corresponds to the adjacent CH carbon.

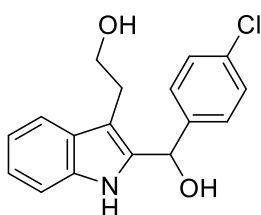

**Name: 2-(2-((4-chlorophenyl)(hydroxy)methyl)-1H-indol-3-yl)ethan-1-ol**

TLC: Petroleum ether/EtOAc = 15/1,  $R_f$  = 0.5, Yield: 82%,  $^1\text{H NMR}$  (500 MHz,  $\text{CDCl}_3$ )  $\delta$  ppm: 2.33(s, 3H), 2.76-2.81(m, 1H), 3.02-3.08(m, 1H), 3.90-3.95(m, 1H), 4.24-4.28(m, 1H), 5.70(s, 1H), 7.09-7.16(m, 5H), 7.20-7.22(d, 2H,  $J$ =8 Hz), 7.52(s, 1H), 7.53-7.534(d, 1H,  $J$ =3 Hz).  $^{13}\text{C NMR}$  (125 MHz,  $\text{CDCl}_3$ )  $\delta$  ppm: 21.2, 22.3, 64.6, 75.9, 108.7, 110.9, 118.3, 119.6, 121.8, 127.0, 128.4, 129.4, 133.8, 135.9, 136.5, 138.7. **HRMS (ESI<sup>+</sup>)**: calculated for  $\text{C}_{17}\text{H}_{17}\text{ClNO}_2$ ,  $[\text{M}+\text{H}]^+$  302.0942, found 302.0937.

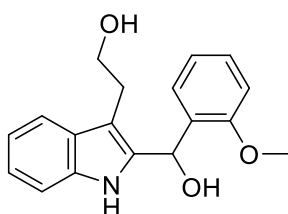

**Name: 2-(2-(2-hydroxy(2-methoxyphenyl)methyl)-1H-indol-3-yl)ethan-1-ol**

TLC: Petroleum ether/EtOAc = 15/1,  $R_f$  = 0.5, Yield: 84%,  $^1\text{H NMR}$  (500 MHz,  $\text{CDCl}_3$ )  $\delta$  ppm: 2.76-2.81(m, 1H), 3.01-3.06(m, 1H), 3.94(s, 3H), 3.95-4.00(m, 1H), 4.31-4.34(m, 1H), 6.28(s, 1H), 6.90-6.92(t, 1H,  $J$ =14.5 Hz), 6.96-6.98(d, 1H,  $J$ =8 Hz), 7.06-7.11(m, 2H), 7.12-7.20(dd, 1H), 7.28-7.31(m, 2H), 7.50-7.52(t, 1H,  $J$ =8.5 Hz), 7.88(s, 1H).  $^{13}\text{C NMR}$  (125 MHz,  $\text{CDCl}_3$ )  $\delta$  ppm: 22.4, 55.7, 64.8, 69.3, 108.1, 110.9, 118.1, 119.3, 121.1, 121.6, 126.9, 128.5, 128.5, 129.3, 134.2, 135.7. **HRMS (ESI<sup>+</sup>)**: calculated for  $\text{C}_{18}\text{H}_{20}\text{NO}_3$ ,  $[\text{M}+\text{H}]^+$  298.1438, found 298.1440

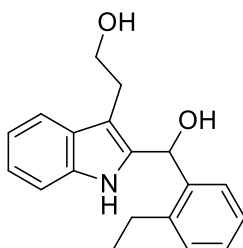

**Name: 2-(2-((2-ethylphenyl)(hydroxy)methyl)-1H-indol-3-yl)ethan-1-ol**

TLC: Petroleum ether/EtOAc = 15/1,  $R_f$  = 0.5, Yield: 86%,  $^1\text{H NMR}$  (500 MHz,  $\text{CDCl}_3$ )  $\delta$  ppm: 1.20-1.23(m, 3H), 2.75-2.81(m, 3H), 2.96-2.99(m, 3H), 3.85-3.89(m, 1H), 4.15-4.17(m, 1H), 5.97(s, 1H), 7.01-7.06(m, 5H), 7.23-7.24(t, 2H,  $J$ =5 Hz), 7.47-7.50(m, 2H).  $^{13}\text{C NMR}$  (125 MHz,  $\text{CDCl}_3$ )  $\delta$  ppm: 16.2, 22.5, 25.6, 64.5, 73.1, 76.1, 109.2, 111.2, 118.4, 119.7, 121.9, 126.2, 127.2, 129.2, 129.5, 129.7, 133.9, 136.2, 136.7, 143.9. **HRMS (ESI<sup>+</sup>)**: calculated for  $\text{C}_{19}\text{H}_{22}\text{NO}_2$ ,  $[\text{M}+\text{H}]^+$  296.1645, found 296.1439.

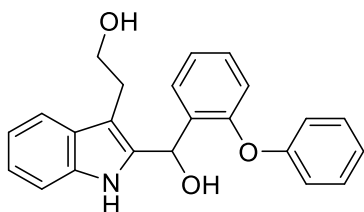

**Name: 2-(2-(hydroxy(2-phenoxyphenyl)methyl)-1H-indol-3-yl)ethan-1-ol**

TLC: Petroleum ether/EtOAc = 15/1,  $R_f$  = 0.5, Yield: 85%,  $^1\text{H NMR}$  (500 MHz,  $\text{CDCl}_3$ )  $\delta$  ppm: 2.72-2.77(m, 1H), 3.89-3.94(m, 1H), 4.31-4.35(m, 1H), 6.22(s, 1H), 6.99-7.13(m, 8H), 7.20-7.27(m, 2H), 7.31-7.34(m, 2H), 7.46-7.51(m, 2H), 7.98(s, 1H).  $^{13}\text{C NMR}$  (125 MHz,  $\text{CDCl}_3$ )  $\delta$  ppm: 22.4, 65.2, 69.8, 108.3, 111.1, 118.0, 118.3, 119.6, 119.7, 121.9, 123.4, 124.6, 126.9, 129.1, 129.6, 130.0, 131.9, 133.9, 135.9. **HRMS (ESI<sup>+</sup>)**: calculated for  $\text{C}_{23}\text{H}_{22}\text{NO}_3$ ,  $[\text{M}+\text{H}]^+$  360.1594, found 360.1601.

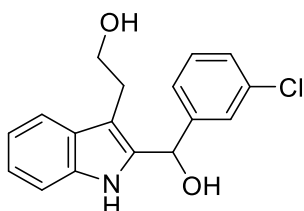

**Name: 2-(2-((3-chlorophenyl)(hydroxy)methyl)-1H-indol-3-yl)ethan-1-ol**

TLC: Petroleum ether/EtOAc = 10/1,  $R_f$  = 0.5, Yield: 86%,  $^1\text{H NMR}$  (500 MHz,  $\text{CDCl}_3$ )  $\delta$  ppm: 2.79-2.84(m, 1H), 3.05-3.11(m, 1H), 3.93-3.98(m, 1H), 4.27-4.31(s, 1H), 7.11-7.18(m, 2H), 7.22-7.26(m, 2H), 7.28-7.30(d, 1H,  $J=7.5$  Hz), 7.31-7.36(m, 2H), 7.46(s, 1H), 7.54-7.57(m, 1H).  $^{13}\text{C NMR}$  (125 MHz,  $\text{CDCl}_3$ )  $\delta$  ppm: 22.2, 64.9, 75.5, 109.0, 111.1, 118.5, 119.8, 122.2, 126.5, 126.9, 128.5, 129.1, 130.1, 132.8, 134.8, 136.1, 141.6. **HRMS (ESI<sup>+</sup>)**: calculated for  $\text{C}_{17}\text{H}_{17}\text{ClNO}_2$ ,  $[\text{M}+\text{H}]^+$  302.0942, found 302.0947.

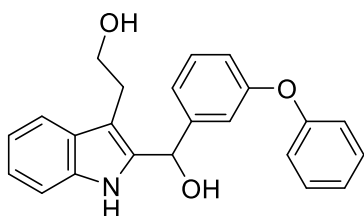

**Name: 2-(2-(hydroxy(3-phenoxyphenyl)methyl)-1H-indol-3-yl)ethan-1-ol**

TLC: Petroleum ether/EtOAc = 15/1,  $R_f$  = 0.5, Yield: 85%,  $^1\text{H NMR}$  (500 MHz,  $\text{CDCl}_3$ )  $\delta$  ppm: 2.79-2.84(m, 1H), 3.06-3.12(m, 1H), 3.96-4.01(m, 1H), 4.32-4.36(m, 1H), 5.77-5.774(d, 1H,  $J=1.5$  Hz), 6.97-7.02(m, 3H), 7.09-7.18(m, 5H), 7.26-7.27(q, 3H,  $J=9$  Hz), 7.32-7.35(m, 3H),

7.47(s, 1H), 7.54-7.55(d, 1H,  $J=7.5$  Hz).  $^{13}\text{C}$  NMR (125 MHz,  $\text{CDCl}_3$ )  $\delta$  ppm: 22.3, 65.0, 75.8, 108.8, 110.0, 118.4, 118.9, 119.0, 119.7, 122.1, 123.5, 127.0, 129.8, 130.1, 133.3, 136.1, 141.6.  
**HRMS (ESI<sup>+</sup>):** calculated for  $\text{C}_{23}\text{H}_{22}\text{NO}_2$ ,  $[\text{M}+\text{H}]^+$  360.1594, found 360.1589.

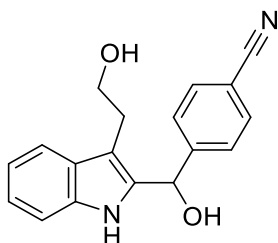

**Name:** 4-(hydroxy(3-(2-hydroxyethyl)-1H-indol-2-yl)methyl)benzonitrile

TLC: Petroleum ether/EtOAc = 13/1,  $R_f$  = 0.5, Yield: 89%,  $^1\text{H}$  NMR (500 MHz,  $\text{CDCl}_3$ )  $\delta$  ppm: 2.82-2.87(m, 1H), 3.06-3.12(m, 1H), 3.96-4.01(m, 1H), 4.27-4.31(m, 1H), 5.85(s, 1H), 7.12-7.20(m, 2H), 7.25-7.27(d, 1H,  $J=7.5$  Hz), 7.50-7.51(d, 3H,  $J=8.5$  Hz), 7.56-7.57(d, 1H,  $J=2.5$  Hz), 7.65-7.67(d, 2H,  $J=8$  Hz).  $^{13}\text{C}$  NMR (125 MHz,  $\text{CDCl}_3$ )  $\delta$  ppm: 22.2, 29.7, 64.9, 75.3, 109.3, 111.1, 112.7, 118.5, 118.5, 119.9, 122.5, 126.8, 129.0, 132.1, 132.7, 136.2, 144.8.  
**HRMS (ESI<sup>+</sup>):** calculated for  $\text{C}_{18}\text{H}_{17}\text{N}_2\text{O}_3$ ,  $[\text{M}+\text{H}]^+$  293.1285, found 293.1280.

### <sup>1</sup>H-NMR (500 MHz, CDCl<sub>3</sub>)

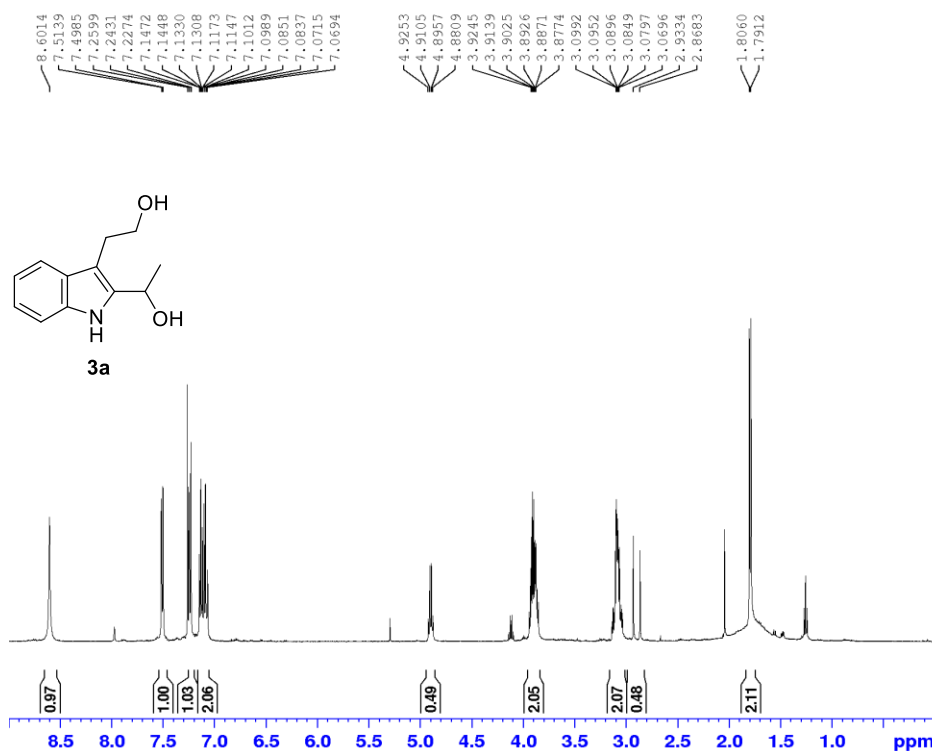

Current Data Parameters  
NAME 20210709 nmr h  
EXPNO 10  
PROCNO 1

F2 - Acquisition Parameters  
Date\_ 20210709  
Time 11.46 h  
INSTRUM spect  
PROBHD Z113652\_0230 (  
PULPROG zg30  
TD 65536  
SOLVENT CDCl3  
NS 3  
DS 2  
SWH 10000.000 Hz  
FIDRES 0.305176 Hz  
AQ 3.2767999 sec  
RG 116.68  
DW 50.000 usec  
DE 6.50 usec  
TE 295.8 K  
D1 1.00000000 sec  
TDO 1  
SFO1 500.1330883 MHz  
NUC1 1H  
P1 9.60 usec  
PLW1 22.00000000 W

F2 - Processing parameters  
SI 65536  
SF 500.1300122 MHz  
WDW EM  
SSB 0  
LB 0.30 Hz  
GB 0  
PC 1.00

TYF03196-1

### <sup>13</sup>C-NMR (125 MHz, CDCl<sub>3</sub>)

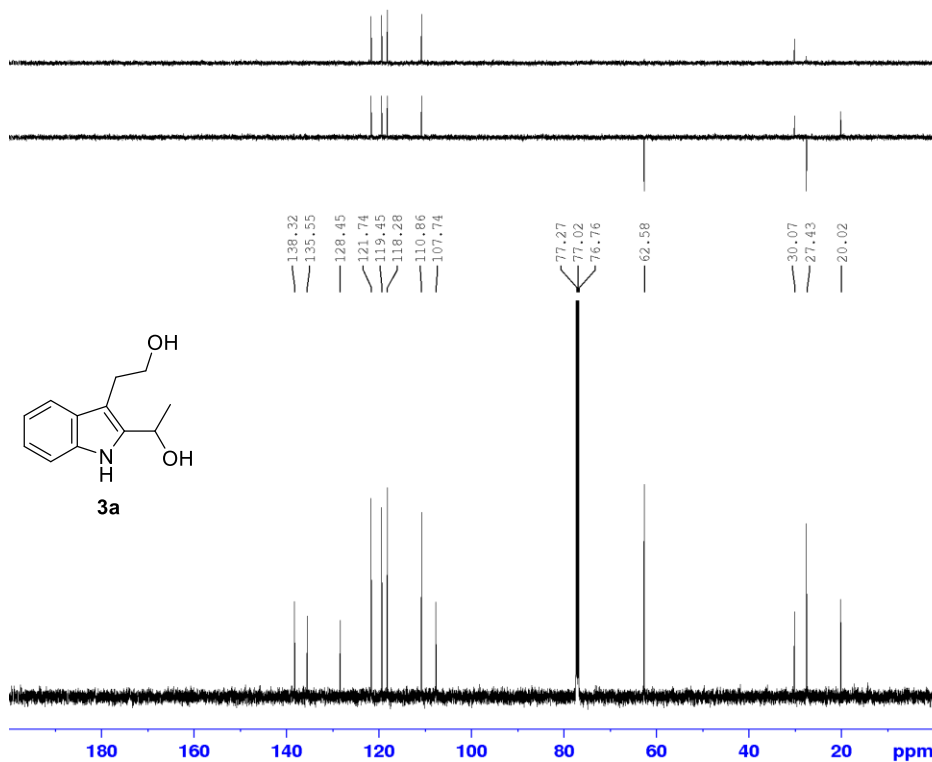

Current Data Parameters  
NAME 20210709 nmr c  
EXPNO 12  
PROCNO 1

F2 - Acquisition Parameters  
Date\_ 20210709  
Time 19.23 h  
INSTRUM spect  
PROBHD Z113652\_0230 (  
PULPROG zgpg30  
TD 65536  
SOLVENT CDCl3  
NS 400  
DS 4  
SWH 29761.904 Hz  
FIDRES 0.908261 Hz  
AQ 1.1010048 sec  
RG 190.79  
DW 16.800 usec  
DE 6.50 usec  
TE 297.3 K  
D1 2.00000000 sec  
D11 0.03000000 sec  
TDO 1  
SFO1 125.7703643 MHz  
NUC1 13C  
P1 12.00 usec  
PLW1 90.00000000 W  
SFO2 500.1320005 MHz  
NUC2 1H  
CPDPRG2 waltz16  
PCPD2 80.00 usec  
PLW2 22.00000000 W  
PLW12 0.34720001 W  
PLW13 0.17464000 W

F2 - Processing parameters  
SI 32768  
SF 125.7577885 MHz  
WDW EM  
SSB 0  
LB 1.00 Hz  
GB 0  
PC 1.40

TYF03196-1

### H-NMR (500 MHz, CDCl<sub>3</sub>)

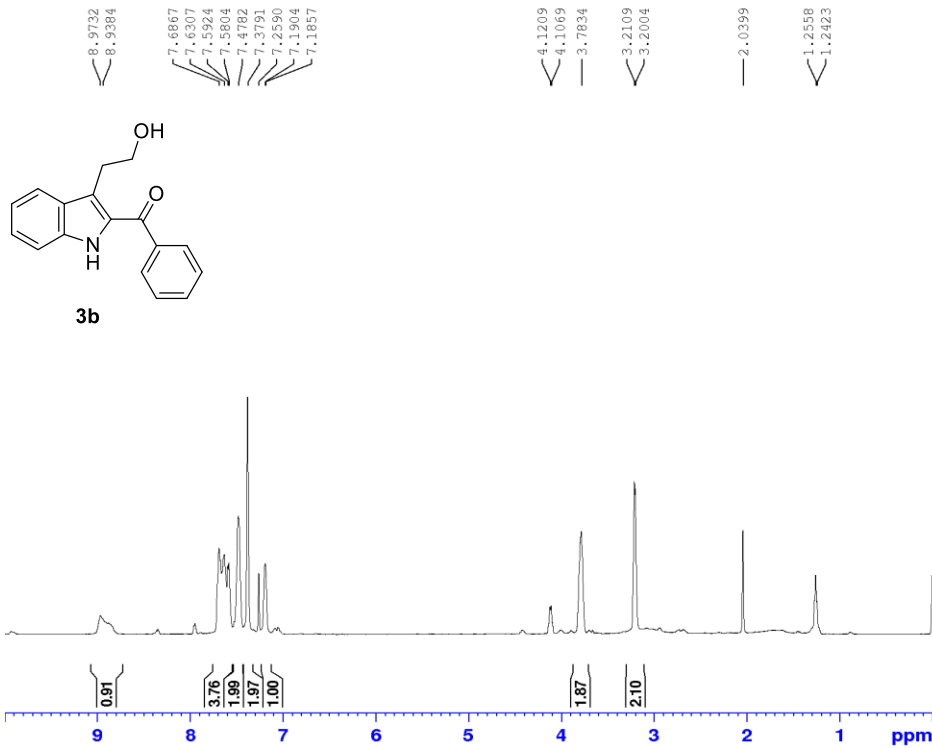

```

Current Data Parameters
NAME      20211203-1 nmr h
EXPNO    70
PROCNO   1

F2 - Acquisition Parameters
Date_    20211203
Time     14.57 h
INSTRUM spect
PROBHD   Z113652_0230 (
PULPROG zg30
TD       65536
SOLVENT  CDCl3
NS       3
DS       2
SWH      10000.000 Hz
FIDRES   0.305176 Hz
AQ       3.2767999 sec
RG       95.16
DW       50.000 usec
DE       13.89 usec
TE       294.5 K
D1       1.00000000 sec
TD0      1
SF01     500.1330883 MHz
NUC1     1H
PO       3.33 usec
P1       10.00 usec
PLW1     25.23200035 W

F2 - Processing parameters
SI       65536
SF       500.1300127 MHz
WDW      EM
SSB      0
LB       0.30 Hz
GB       0
PC       1.00
    
```

### <sup>13</sup>C-NMR (150 MHz, CDCl<sub>3</sub>)

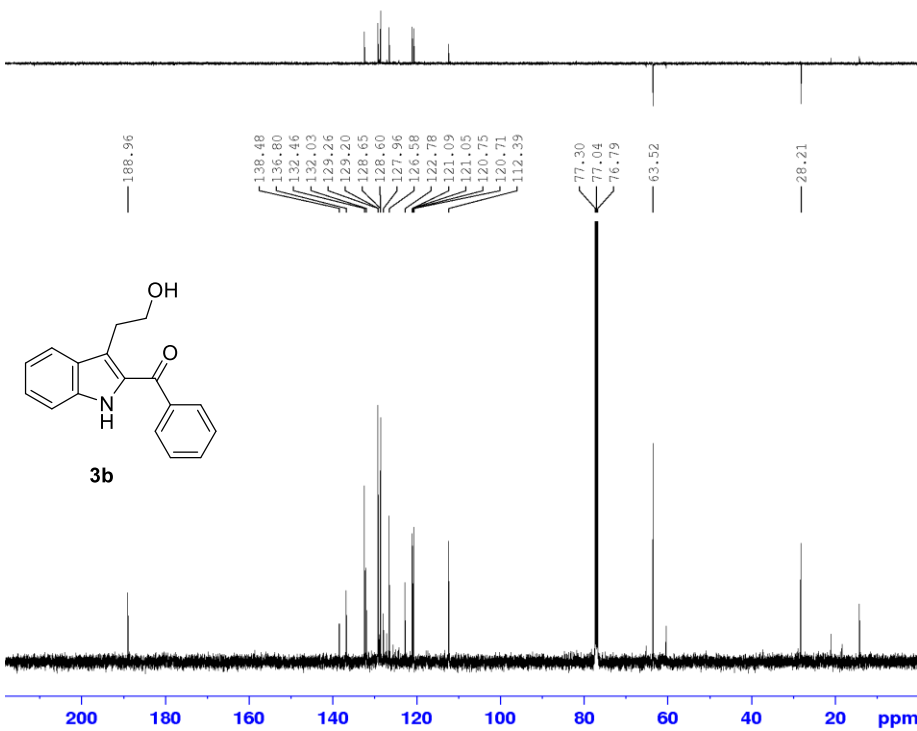

```

Current Data Parameters
NAME      20211203 nm c
EXPNO    70
PROCNO   1

F2 - Acquisition Parameters
Date_    20211203
Time     16.52 h
INSTRUM spect
PROBHD   Z113652_0230 (
PULPROG zgpg30
TD       65536
SOLVENT  CDCl3
NS       324
DS       4
SWH      29761.904 Hz
FIDRES   0.908261 Hz
AQ       1.1010048 sec
RG       190.79
DW       16.800 usec
DE       6.50 usec
TE       296.0 K
D1       2.00000000 sec
D11      0.03000000 sec
TD0      1
SF01     125.7703643 MHz
NUC1     13C
PO       3.33 usec
P1       10.00 usec
PLW1     102.87999725 W
SF02     500.1320005 MHz
NUC2     1H
CPDPRG[2] waltz265
PCPD2    80.00 usec
PLW2     25.23200035 W
PLW12    0.39425001 W
PLW13    0.19831000 W

F2 - Processing parameters
SI       32768
SF       125.7577885 MHz
WDW      EM
SSB      0
LB       1.00 Hz
GB       0
PC       1.40
    
```

# <sup>1</sup>H-NMR (500 MHz, CDCl<sub>3</sub>)

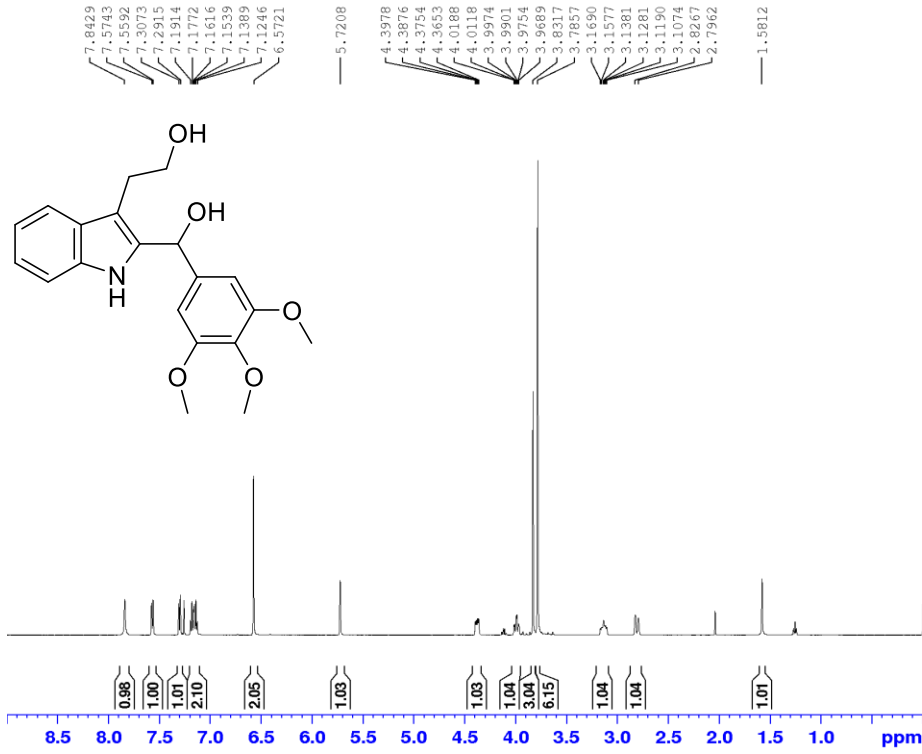

Current Data Parameters  
NAME 20220420 hnm h  
EXPNO 70  
PROCNO 1

F2 - Acquisition Parameters  
Date\_ 20220420  
Time 16.38 h  
INSTRUM spect  
PROBHD Z113652\_0230 (  
PULPROG zg30  
TD 65536  
SOLVENT CDCl3  
NS 3  
DS 2  
SWH 10000.000 Hz  
FIDRES 0.305176 Hz  
AQ 3.2767999 sec  
RG 116.68  
DW 50.000 usec  
DE 13.89 usec  
TE 296.2 K  
D1 1.00000000 sec  
TDO 1  
SFO1 500.1330883 MHz  
NUC1 1H  
P0 3.33 usec  
P1 10.00 usec  
PLW1 25.23200035 W

F2 - Processing parameters  
SI 65536  
SF 500.1300142 MHz  
WDW EM  
SSB 0  
LB 0.30 Hz  
GB 0  
PC 1.00

YX01129-1

# <sup>13</sup>C-NMR (150 MHz, CDCl<sub>3</sub>)

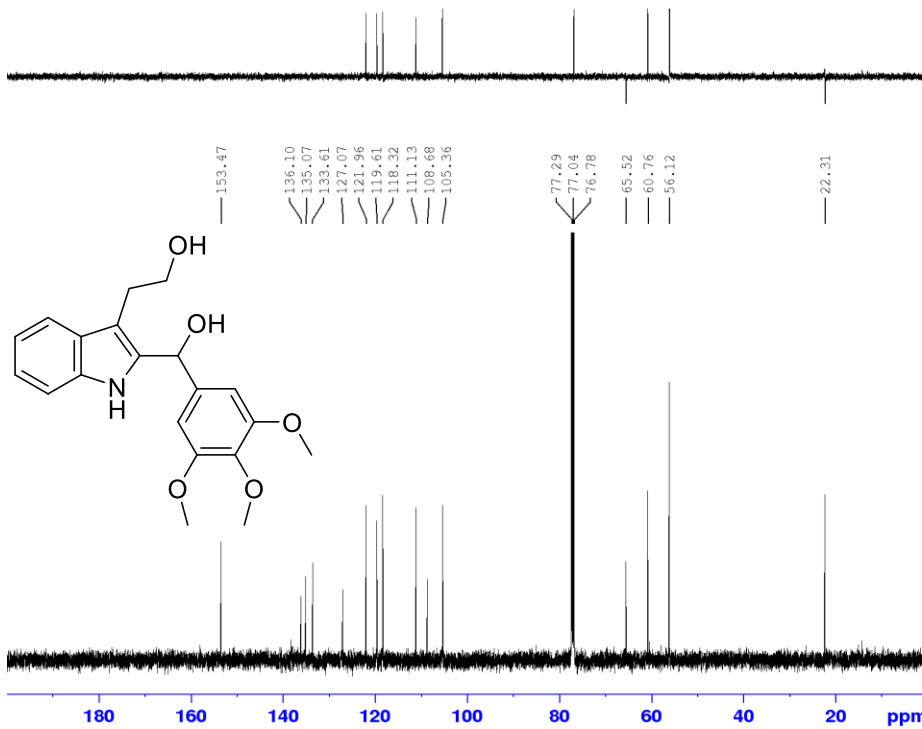

Current Data Parameters  
NAME 20220421 nmr c  
EXPNO 21  
PROCNO 1

F2 - Acquisition Parameters  
Date\_ 20220421  
Time 16.48 h  
INSTRUM spect  
PROBHD Z113652\_0230 (  
PULPROG zpgp30  
TD 65536  
SOLVENT CDCl3  
NS 132  
DS 4  
SWH 29761.904 Hz  
FIDRES 0.908261 Hz  
AQ 1.1010048 sec  
RG 190.79  
DW 16.800 usec  
DE 6.50 usec  
TE 296.5 K  
D1 2.00000000 sec  
D11 0.03000000 sec  
TDO 1  
SFO1 125.7703643 MHz  
NUC1 13C  
P0 3.33 usec  
P1 10.00 usec  
PLW1 102.87999725 W  
SFO2 500.1320005 MHz  
NUC2 1H  
CPDPRG[2] waltz265  
PCPD2 80.00 usec  
PLW2 25.23200035 W  
PLW12 0.39425001 W  
PLW13 0.19831000 W

F2 - Processing parameters  
SI 32768  
SF 125.7577885 MHz  
WDW EM  
SSB 0  
LB 1.00 Hz  
GB 0  
PC 1.40

YX01129-1

# <sup>1</sup>H-NMR (500 MHz, MeOD)

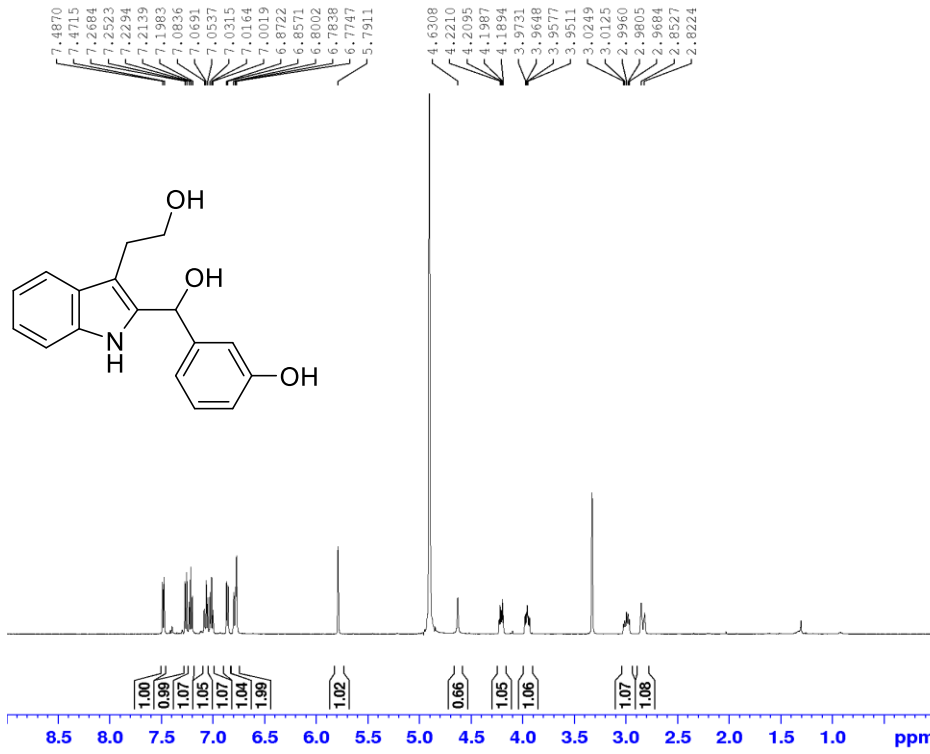

Current Data Parameters  
NAME 20220420 hnm h  
EXPNO 100  
PROCNO 1

F2 - Acquisition Parameters  
Date\_ 20220420  
Time 16.49 h  
INSTRUM spect  
PROBHD Z113652\_0230 (  
PULPROG zg30  
TD 65536  
SOLVENT MeOD  
NS 3  
DS 2  
SWH 10000.000 Hz  
FIDRES 0.305176 Hz  
AQ 3.2767999 sec  
RG 108.03  
DW 50.000 usec  
DE 13.89 usec  
TE 296.0 K  
D1 1.00000000 sec  
TDO 1  
SFO1 500.1330883 MHz  
NUC1 1H  
P0 3.33 usec  
P1 10.00 usec  
PLW1 25.23200035 W

F2 - Processing parameters  
SI 65536  
SF 500.1300000 MHz  
WDW EM  
SSB 0  
LB 0.30 Hz  
GB 0  
PC 1.00

YX01131-1

# <sup>13</sup>C-NMR (125 MHz, MeOD)

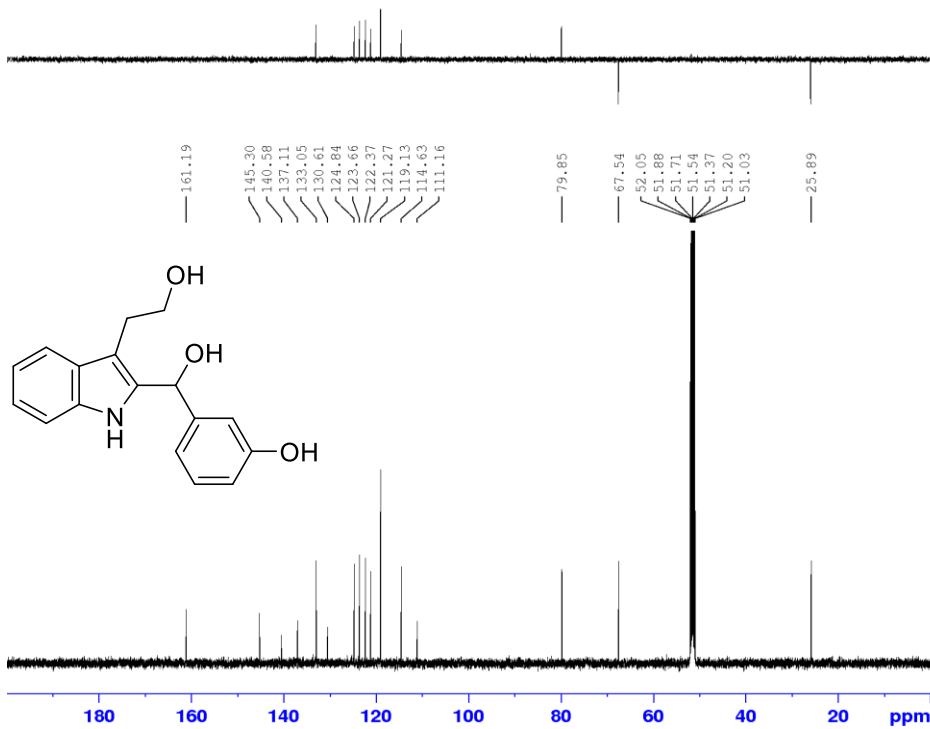

Current Data Parameters  
NAME 20220421 nmr c  
EXPNO 71  
PROCNO 1

F2 - Acquisition Parameters  
Date\_ 20220421  
Time 19.48 h  
INSTRUM spect  
PROBHD Z113652\_0230 (  
PULPROG zgpg30  
TD 65536  
SOLVENT CDCl3  
NS 420  
DS 4  
SWH 29761.904 Hz  
FIDRES 0.908261 Hz  
AQ 1.1010048 sec  
RG 190.79  
DW 16.800 usec  
DE 6.50 usec  
TE 296.9 K  
D1 2.00000000 sec  
D11 0.03000000 sec  
TDO 1  
SFO1 125.7703643 MHz  
NUC1 13C  
P0 3.33 usec  
P1 10.00 usec  
PLW1 102.87999725 W  
SFO2 500.1320005 MHz  
NUC2 1H  
CPDPRG[2] waltz65  
PCPD2 80.00 usec  
PLW2 25.23200035 W  
PLW12 0.39425001 W  
PLW13 0.19831000 W

F2 - Processing parameters  
SI 32768  
SF 125.7577885 MHz  
WDW EM  
SSB 0  
LB 1.00 Hz  
GB 0  
PC 1.40

YX01131-1

# <sup>1</sup>H-NMR (500 MHz, CDCl<sub>3</sub>)

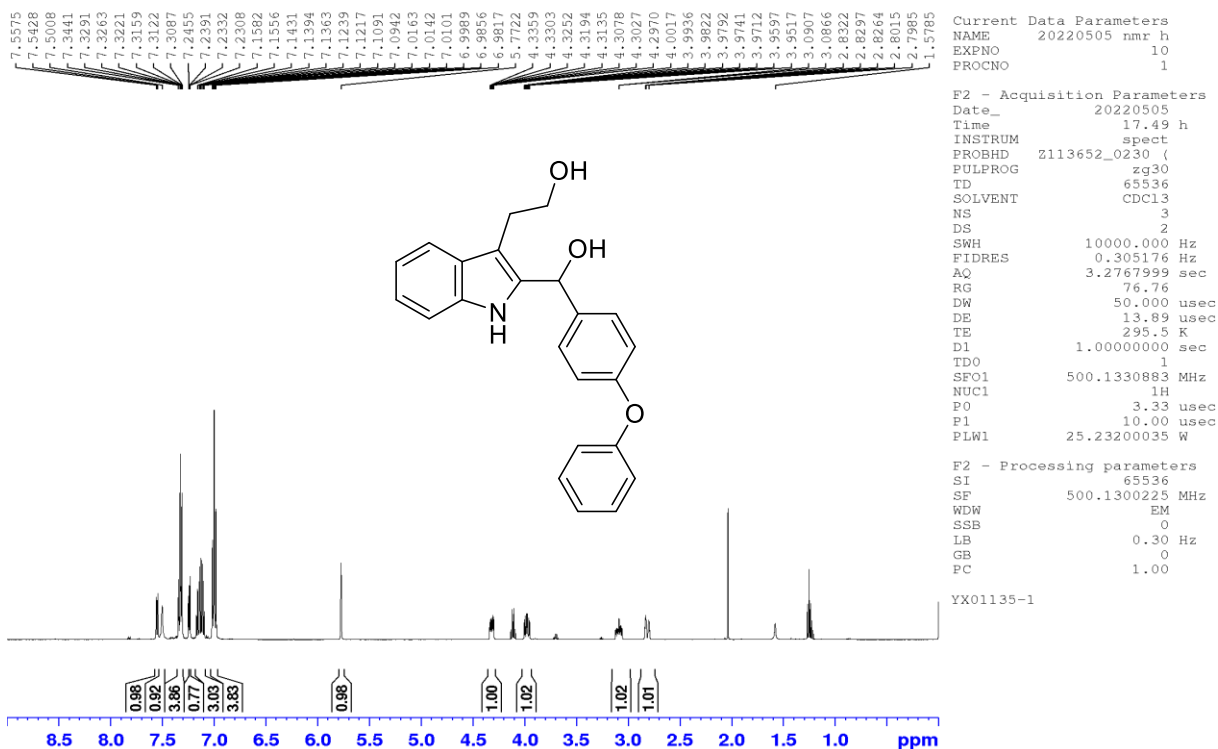

# <sup>13</sup>C-NMR (125 MHz, CDCl<sub>3</sub>)

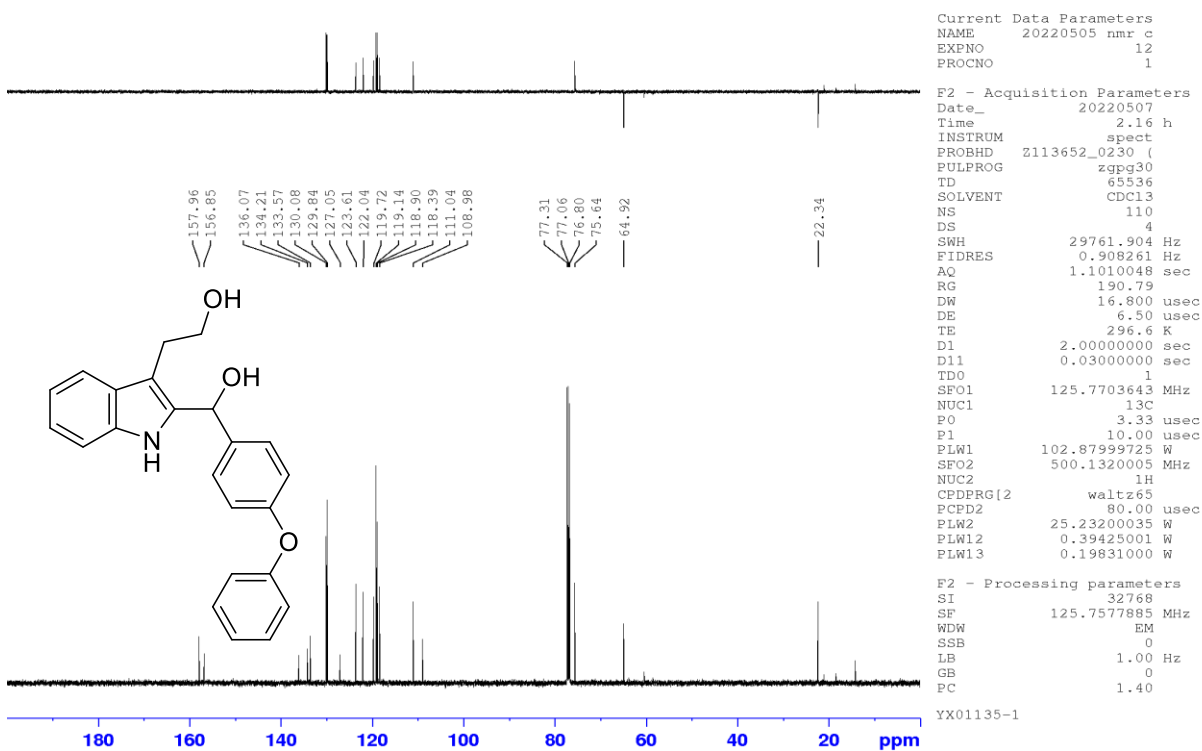

# <sup>1</sup>H-NMR (500 MHz, CDCl<sub>3</sub>)

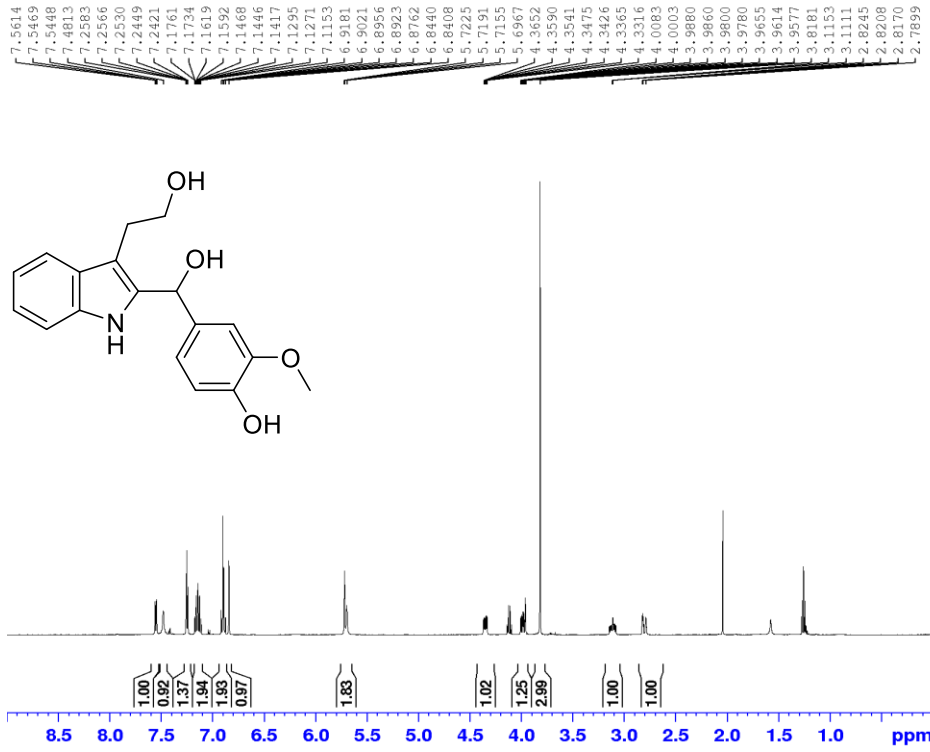

Current Data Parameters  
NAME 20220505 nmr h  
EXPNO 20  
PROCNO 1

F2 - Acquisition Parameters  
Date\_ 20220505  
Time 17.53 h  
INSTRUM spect  
PROBHD Z113652\_0230 (  
PULPROG zg30  
TD 65536  
SOLVENT CDCl3  
NS 3  
DS 2  
SWH 10000.000 Hz  
FIDRES 0.305176 Hz  
AQ 3.2767999 sec  
RG 116.68  
DW 50.000 usec  
DE 13.89 usec  
TE 295.5 K  
D1 1.00000000 sec  
TDO 1  
SFO1 500.1330883 MHz  
NUC1 1H  
P0 3.33 usec  
P1 10.00 usec  
PLW1 25.23200035 W

F2 - Processing parameters  
SI 65536  
SF 500.1300156 MHz  
WDW EM  
SSB 0  
LB 0.30 Hz  
GB 0  
PC 1.00

YX01138-1

# <sup>13</sup>C-NMR (125 MHz, CDCl<sub>3</sub>)

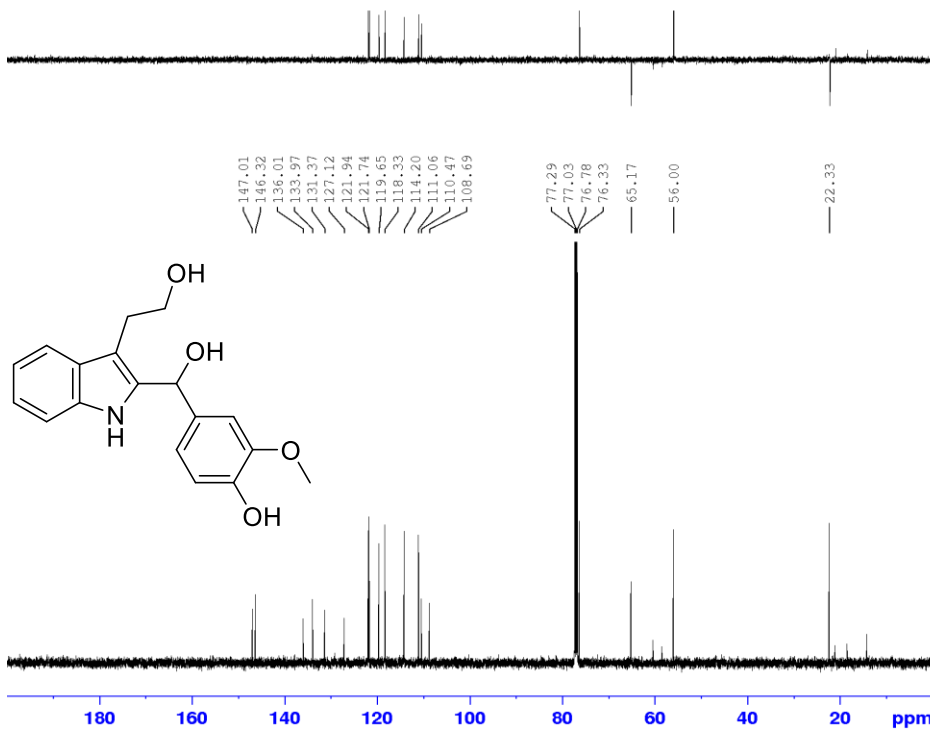

Current Data Parameters  
NAME 20220505 nmr c  
EXPNO 22  
PROCNO 1

F2 - Acquisition Parameters  
Date\_ 20220507  
Time 2.30 h  
INSTRUM spect  
PROBHD Z113652\_0230 (  
PULPROG zgpg30  
TD 65536  
SOLVENT CDCl3  
NS 180  
DS 4  
SWH 29761.904 Hz  
FIDRES 0.908261 Hz  
AQ 1.1010048 sec  
RG 190.79  
DW 16.800 usec  
DE 6.50 usec  
TE 296.7 K  
D1 2.00000000 sec  
D11 0.03000000 sec  
TDO 1  
SFO1 125.7703643 MHz  
NUC1 13C  
P0 3.33 usec  
P1 10.00 usec  
PLW1 102.87999725 W  
SFO2 500.1320005 MHz  
NUC2 1H  
CPDPRG[2] waltz65  
PCPD2 80.00 usec  
PLW2 25.23200035 W  
PLW12 0.39425001 W  
PLW13 0.19831000 W

F2 - Processing parameters  
SI 32768  
SF 125.7577885 MHz  
WDW EM  
SSB 0  
LB 1.00 Hz  
GB 0  
PC 1.40

YX01138-1

### <sup>1</sup>H-NMR (500 MHz, CDCl<sub>3</sub>)

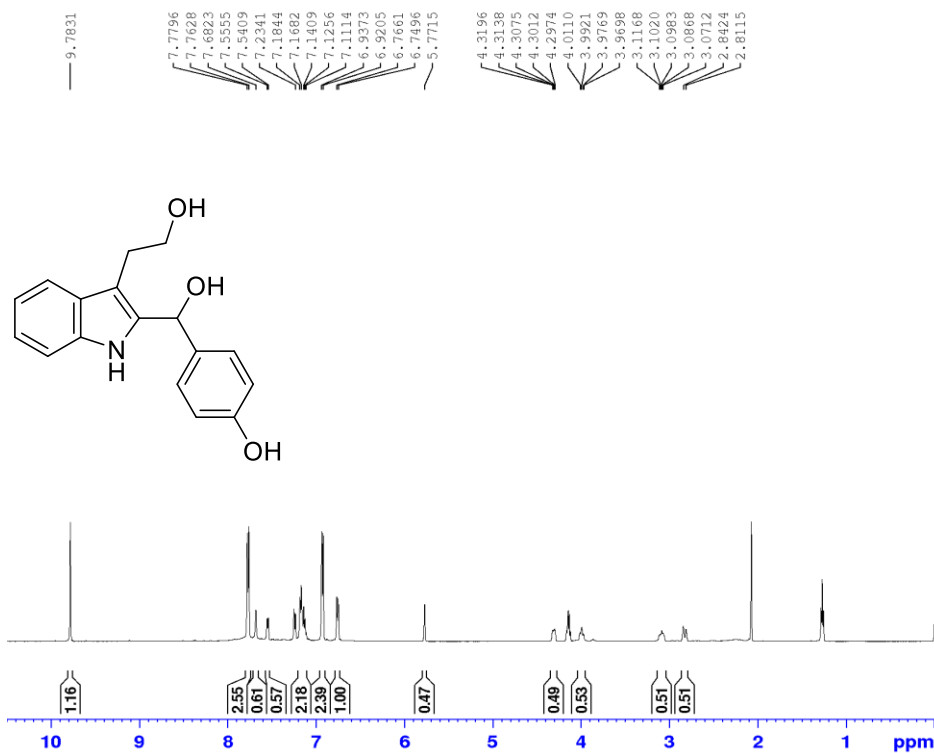

Current Data Parameters  
NAME 20211223 nmr h  
EXPNO 80  
PROCNO 1

F2 - Acquisition Parameters  
Date\_ 20211223  
Time 17.40 h  
INSTRUM spect  
PROBHD Z113652\_0230 (  
PULPROG zg30  
TD 65536  
SOLVENT CDCl3  
NS 3  
DS 2  
SWH 10000.000 Hz  
FIDRES 0.305176 Hz  
AQ 3.2767999 sec  
RG 69.86  
DW 50.000 usec  
DE 13.89 usec  
TE 294.7 K  
D1 1.00000000 sec  
TDO 1  
SFO1 500.1330883 MHz  
NUC1 1H  
P0 3.33 usec  
P1 10.00 usec  
PLW1 25.23200035 W

F2 - Processing parameters  
SI 65536  
SF 500.1300165 MHz  
WDW EM  
SSB 0  
LB 0.30 Hz  
GB 0  
PC 1.00

YX01116-1

### <sup>1</sup>H-NMR (500 MHz, CDCl<sub>3</sub>)

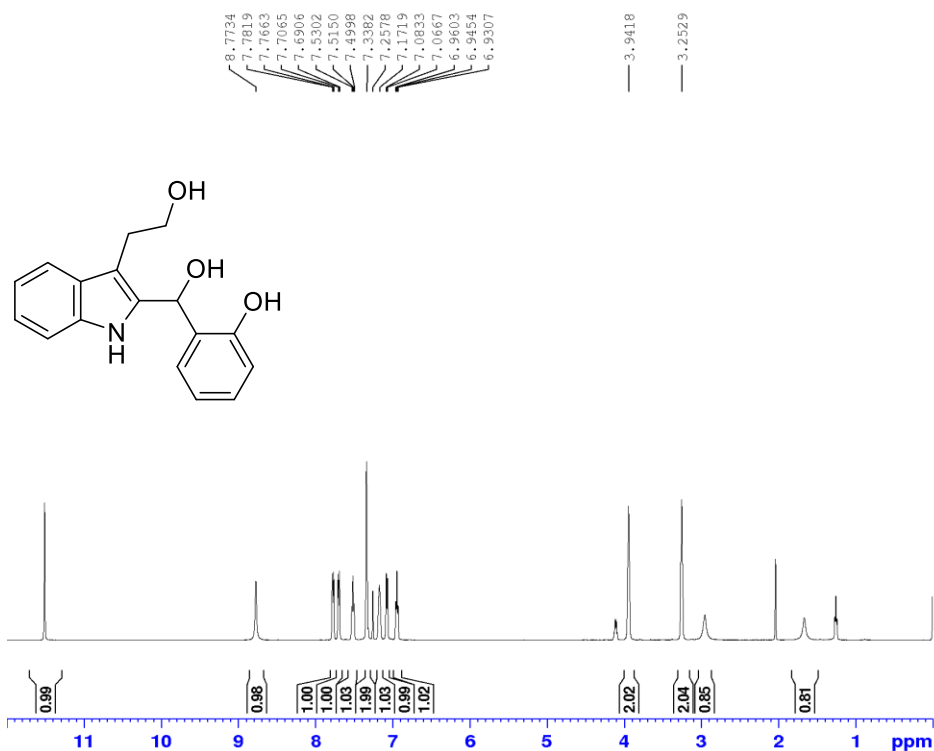

Current Data Parameters  
NAME 20211209 nmr h  
EXPNO 20  
PROCNO 1

F2 - Acquisition Parameters  
Date\_ 20211209  
Time 10.39 h  
INSTRUM spect  
PROBHD Z113652\_0230 (  
PULPROG zg30  
TD 65536  
SOLVENT CDCl3  
NS 3  
DS 2  
SWH 10000.000 Hz  
FIDRES 0.305176 Hz  
AQ 3.2767999 sec  
RG 108.03  
DW 50.000 usec  
DE 13.89 usec  
TE 295.2 K  
D1 1.00000000 sec  
TDO 1  
SFO1 500.1330883 MHz  
NUC1 1H  
P0 3.33 usec  
P1 10.00 usec  
PLW1 25.23200035 W

F2 - Processing parameters  
SI 65536  
SF 500.1300141 MHz  
WDW EM  
SSB 0  
LB 0.30 Hz  
GB 0  
PC 1.00

YX01110-2

# <sup>1</sup>H-NMR (500 MHz, CDCl<sub>3</sub>)

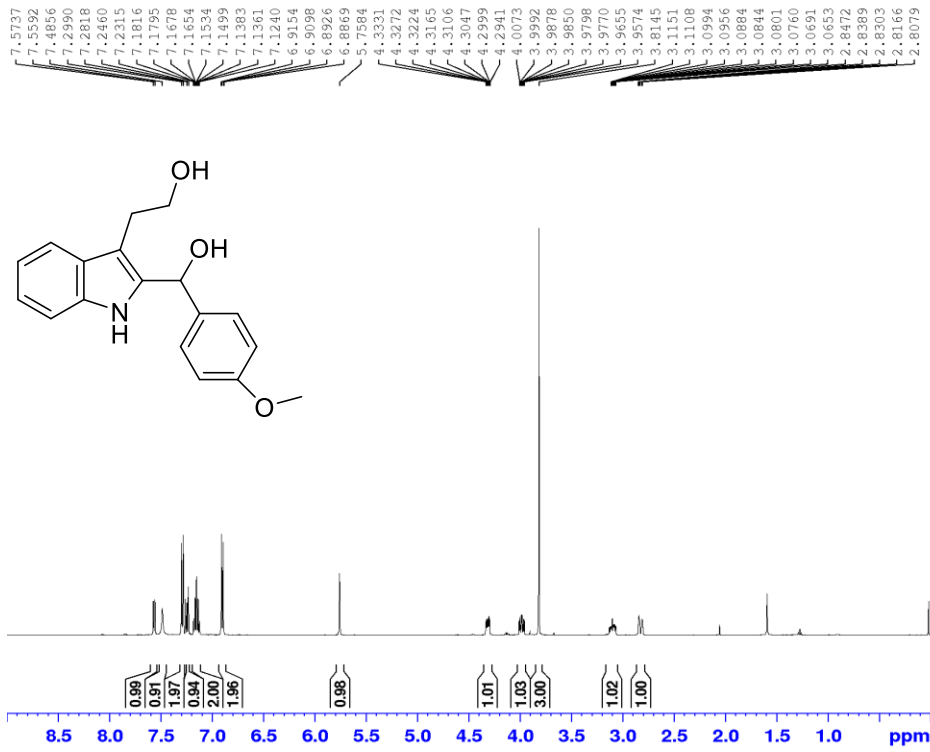

Current Data Parameters  
NAME 20220407 nmr h  
EXPNO 20  
PROCNO 1

F2 - Acquisition Parameters  
Date\_ 20220407  
Time 16.13 h  
INSTRUM spect  
PROBHD Z113652\_0230 (  
PULPROG zg30  
TD 65536  
SOLVENT CDCl3  
NS 2  
DS 2  
SWH 10000.000 Hz  
FIDRES 0.305176 Hz  
AQ 3.2767999 sec  
RG 95.16  
DW 50.000 usec  
DE 13.89 usec  
TE 293.3 K  
D1 1.00000000 sec  
TDO 1  
SFO1 500.1330883 MHz  
NUC1 1H  
FO 3.33 usec  
PL 10.00 usec  
PLW1 25.23200035 W

F2 - Processing parameters  
SI 65536  
SF 500.1300124 MHz  
WDW EM  
SSB 0  
LB 0.30 Hz  
GB 0  
PC 1.00

YX01128-1

# <sup>13</sup>C-NMR (125 MHz, CDCl<sub>3</sub>)

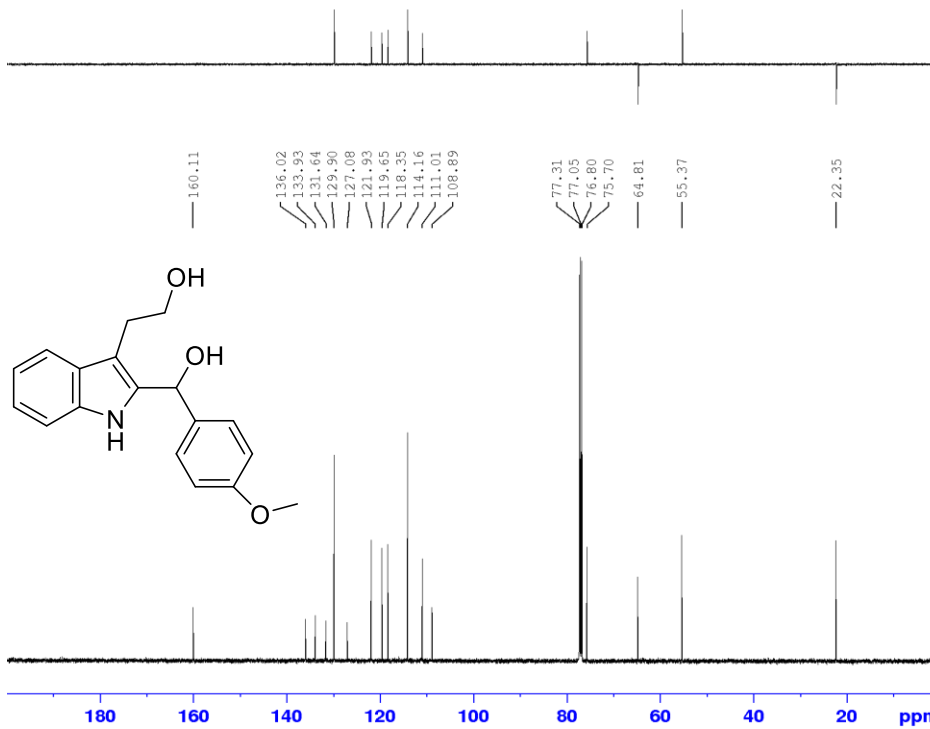

Current Data Parameters  
NAME 20220407 nmr c  
EXPNO 22  
PROCNO 1

F2 - Acquisition Parameters  
Date\_ 20220408  
Time 0.17 h  
INSTRUM spect  
PROBHD Z113652\_0230 (  
PULPROG zgpg30  
TD 65536  
SOLVENT CDCl3  
NS 280  
DS 4  
SWH 29761.904 Hz  
FIDRES 0.908261 Hz  
AQ 1.1010048 sec  
RG 190.79  
DW 16.800 usec  
DE 6.50 usec  
TE 294.5 K  
D1 2.00000000 sec  
D11 0.03000000 sec  
TDO 1  
SFO1 125.7703643 MHz  
NUC1 13C  
FO 3.33 usec  
PL 10.00 usec  
PLW1 102.87999725 W  
SFO2 500.1320005 MHz  
NUC2 1H  
CPDPRG[2] waltz65  
PCPD2 80.00 usec  
PLW2 25.23200035 W  
PLW12 0.39425001 W  
PLW13 0.19831000 W

F2 - Processing parameters  
SI 32768  
SF 125.7577895 MHz  
WDW EM  
SSB 0  
LB 1.00 Hz  
GB 0  
PC 1.40

YX01128-1

# <sup>1</sup>H-NMR (500 MHz, MeOD)

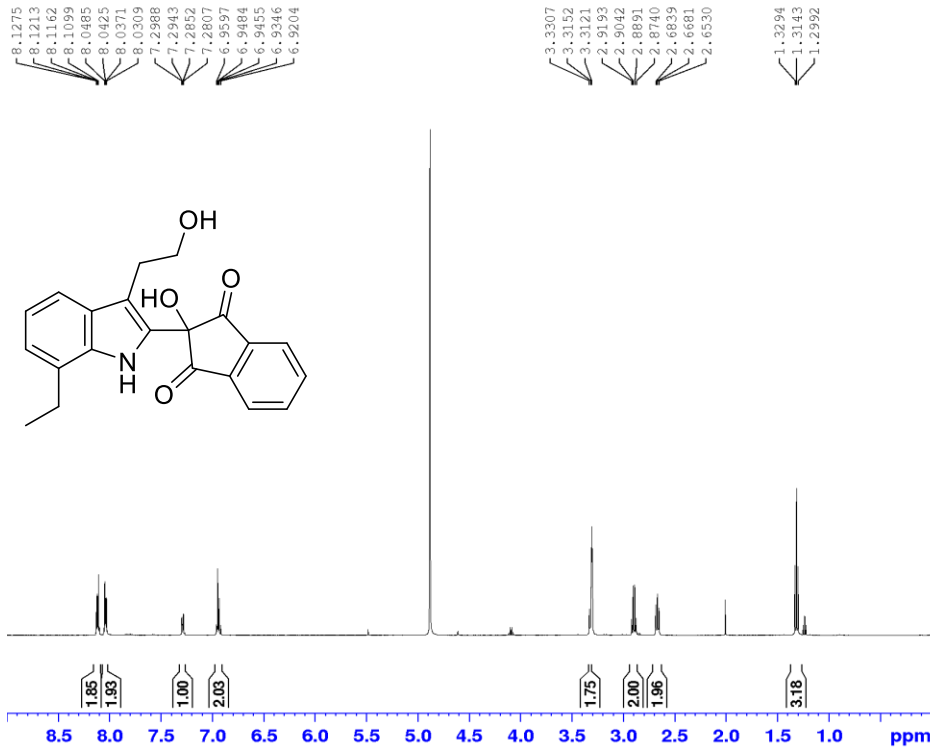

Current Data Parameters  
NAME YX01145-1  
EXPNO 1  
PROCNO 1

F2 - Acquisition Parameters  
Date\_ 20230407  
Time 10.54 h  
INSTRUM Avance  
PROBHD Z151574\_0127 (  
PULPROG zg30  
TD 65536  
SOLVENT MeOD  
NS 16  
DS 2  
SRH 10000.000 Hz  
FIDRES 0.305176 Hz  
AQ 3.2767999 sec  
RG 101  
DW 50.000 usec  
DE 11.14 usec  
TE 294.7 K  
D1 1.00000000 sec  
TD0 1  
SFO1 500.1330883 MHz  
NUC1 1H  
P0 2.67 usec  
P1 8.00 usec  
PLW1 25.47599983 W

F2 - Processing parameters  
SI 65536  
SF 500.1300115 MHz  
WDW EM  
SSB 0  
LB 0.30 Hz  
GB 0  
PC 1.00

YX01145-1

# <sup>13</sup>C-NMR (125 MHz, MeOD)

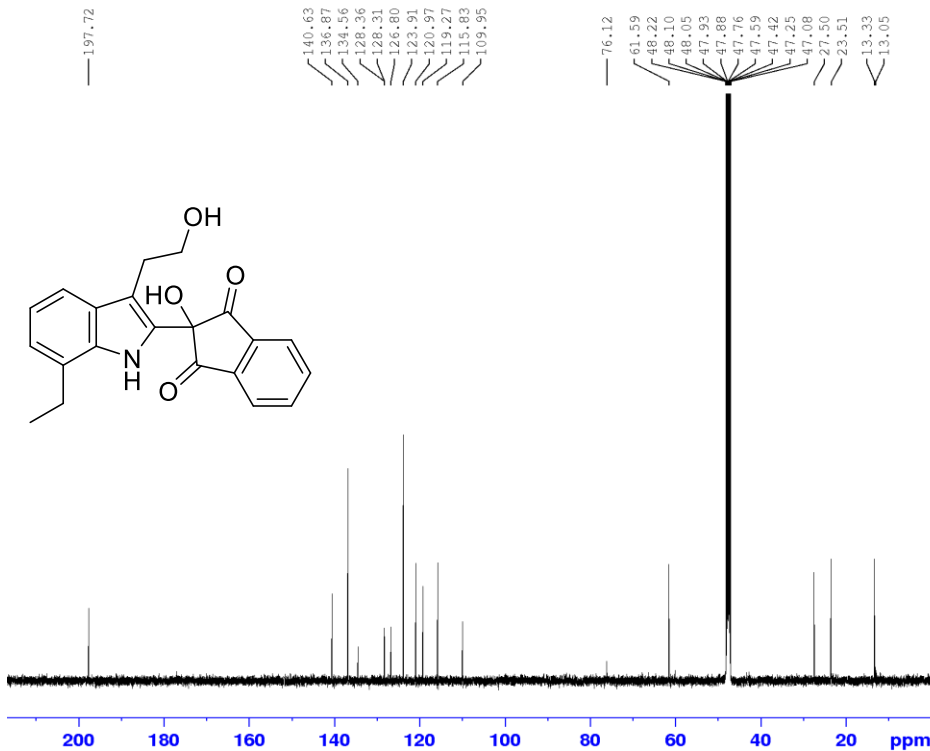

Current Data Parameters  
NAME YX01145-1  
EXPNO 2  
PROCNO 1

F2 - Acquisition Parameters  
Date\_ 20230410  
Time 16.58 h  
INSTRUM Avance  
PROBHD Z151574\_0127 (  
PULPROG zgpg30  
TD 65536  
SOLVENT MeOD  
NS 1024  
DS 4  
SRH 30120.482 Hz  
FIDRES 0.919204 Hz  
AQ 1.0878977 sec  
RG 101  
DW 16.600 usec  
DE 6.50 usec  
TE 298.0 K  
D1 2.00000000 sec  
D11 0.03000000 sec  
TD0 1  
SFO1 125.7703643 MHz  
NUC1 13C  
P0 3.00 usec  
P1 9.00 usec  
PLW1 113.54000092 W  
SFO2 500.1320005 MHz  
NUC2 1H  
CPDPRG[2] waltz65  
PCPD2 80.00 usec  
PLW2 25.47599983 W  
PLW12 0.25476000 W  
PLW13 0.12814000 W

F2 - Processing parameters  
SI 32768  
SF 125.7577885 MHz  
WDW EM  
SSB 0  
LB 1.00 Hz  
GB 0  
PC 1.40

YX01145-1

# <sup>1</sup>H-NMR (500 MHz, MeOD)

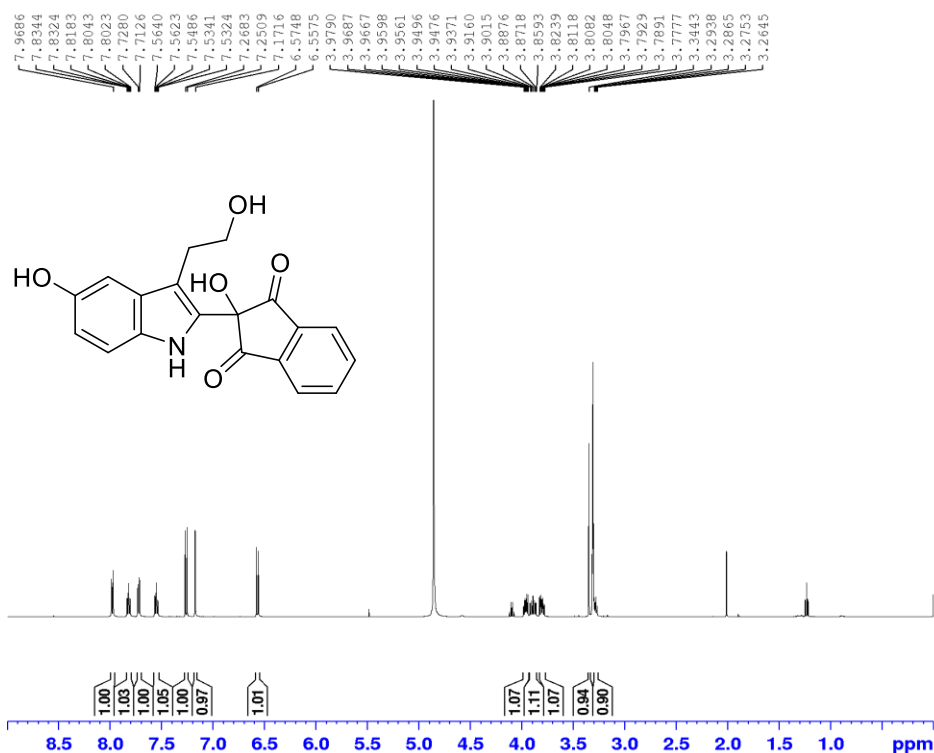

Current Data Parameters  
NAME YX01149-1  
EXPNO 1  
PROCNO 1

F2 - Acquisition Parameters  
Date\_ 20230421  
Time 17.03 h  
INSTRUM Avance  
PROBHD Z151574\_0127 (  
PULPROG zg30  
TD 65536  
SOLVENT MeOD  
NS 16  
DS 2  
SWH 10000.000 Hz  
FIDRES 0.305176 Hz  
AQ 3.2767999 sec  
RG 101  
DW 50.000 usec  
DE 11.14 usec  
TE 298.0 K  
D1 1.00000000 sec  
TD0 1  
SFO1 500.1330883 MHz  
NUC1 1H  
P0 2.67 usec  
P1 8.00 usec  
PLW1 25.47599983 W

F2 - Processing parameters  
SI 65536  
SF 500.1300117 MHz  
WDW EM  
SSB 0  
LB 0.30 Hz  
GB 0  
PC 1.00

# <sup>13</sup>C-NMR (125 MHz, MeOD)

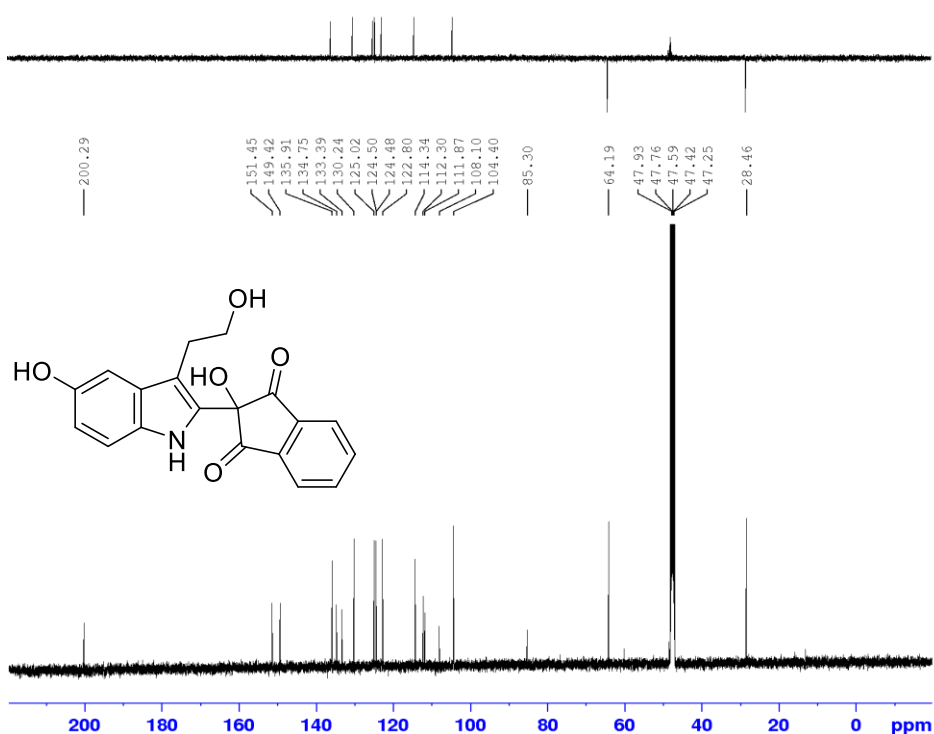

Current Data Parameters  
NAME YX01149-1  
EXPNO 2  
PROCNO 1

F2 - Acquisition Parameters  
Date\_ 20230422  
Time 19.45 h  
INSTRUM Avance  
PROBHD Z151574\_0127 (  
PULPROG zgpg30  
TD 65536  
SOLVENT MeOD  
NS 1024  
DS 4  
SWH 30120.482 Hz  
FIDRES 0.919204 Hz  
AQ 1.0878977 sec  
RG 101  
DW 16.600 usec  
DE 6.50 usec  
TE 298.0 K  
D1 2.00000000 sec  
D11 0.03000000 sec  
TD0 1  
SFO1 125.7703643 MHz  
NUC1 13C  
P0 3.00 usec  
P1 9.00 usec  
PLW1 113.5400092 W  
SFO2 500.1320005 MHz  
NUC2 1H  
CPDPRG[2] waltz65  
PCPD2 80.00 usec  
PLW2 25.47599983 W  
PLW12 0.25476000 W  
PLW13 0.12814000 W

F2 - Processing parameters  
SI 32768  
SF 125.7577885 MHz  
WDW EM  
SSB 0  
LB 1.00 Hz  
CB 0  
PC 1.40

# <sup>1</sup>H-NMR (500 MHz, CDCl<sub>3</sub>)

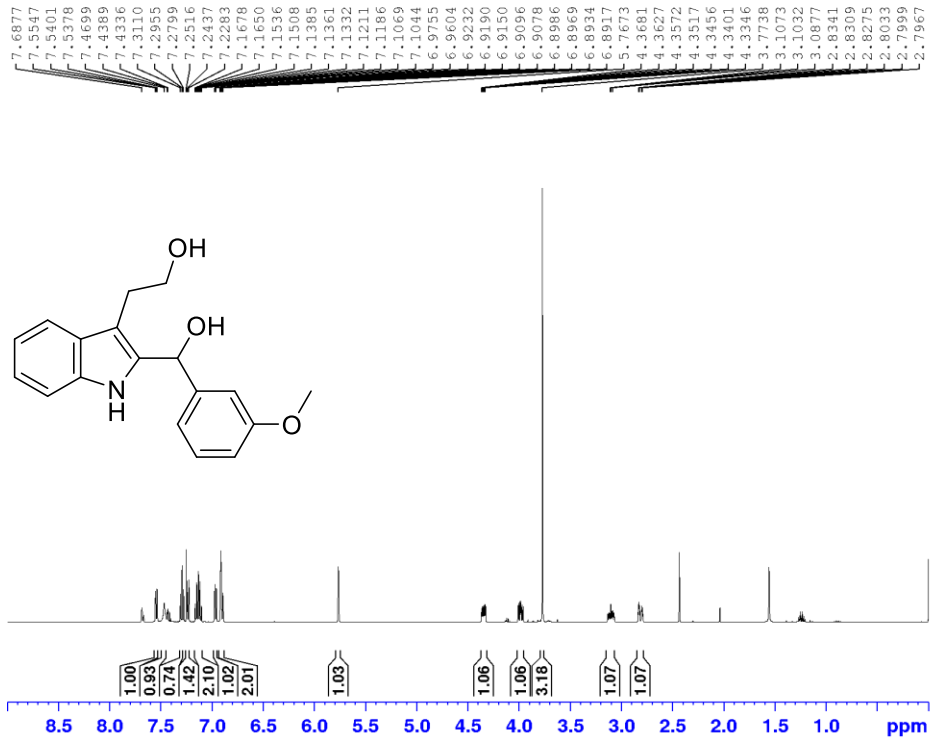

Current Data Parameters  
NAME LYL01022  
EXPNO 1  
PROCNO 1

F2 - Acquisition Parameters  
Date\_ 20230621  
Time 17.54 h  
INSTRUM Avance  
PROBHD Z151574\_0127 (zg30)  
PULPROG zg30  
TD 65536  
SOLVENT CDCl3  
NS 16  
DS 2  
SWH 10000.000 Hz  
FIDRES 0.305176 Hz  
AQ 3.2767999 sec  
RG 101  
DW 50.000 usec  
DE 11.14 usec  
TE 298.0 K  
D1 1.00000000 sec  
TDO 1  
SFO1 500.1330883 MHz  
NUC1 1H  
P0 2.67 usec  
P1 8.00 usec  
PLW1 25.47599983 W

F2 - Processing parameters  
SI 65536  
SF 500.1330156 MHz  
WDW EM  
SSB 0  
LB 0.30 Hz  
GB 9  
PC 1.00

LYL01022

# <sup>13</sup>C-NMR (125 MHz, CDCl<sub>3</sub>)

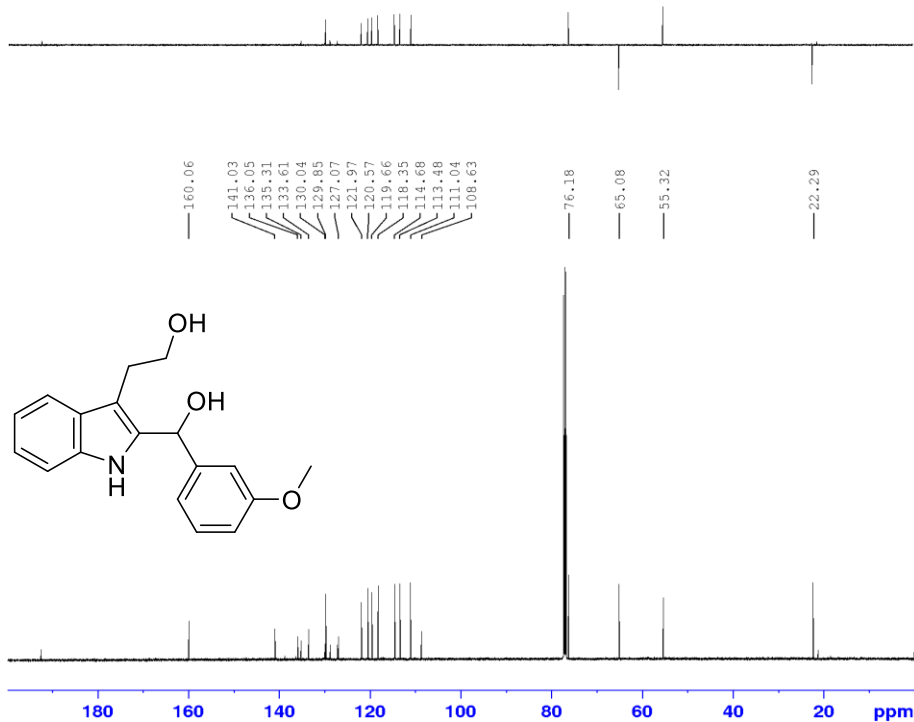

Current Data Parameters  
NAME LYL01022  
EXPNO 2  
PROCNO 1

F2 - Acquisition Parameters  
Date\_ 20230622  
Time 15.53 h  
INSTRUM Avance  
PROBHD Z151574\_0127 (zgpg30)  
PULPROG zgpg30  
TD 65536  
SOLVENT CDCl3  
NS 1024  
DS 4  
SWH 30120.482 Hz  
FIDRES 0.919204 Hz  
AQ 1.0878977 sec  
RG 101  
DW 16.600 usec  
DE 6.50 usec  
TE 298.0 K  
D1 2.00000000 sec  
D11 0.03000000 sec  
TDO 1  
SFO1 125.7703643 MHz  
NUC1 13C  
P0 3.00 usec  
P1 9.00 usec  
PLW1 113.54000092 W  
SFO2 500.1320005 MHz  
NUC2 1H  
CPDPRG2 waltz65  
PCPD2 80.00 usec  
PLW2 25.47599983 W  
PLW12 0.25476000 W  
PLW13 0.12814000 W

F2 - Processing parameters  
SI 32768  
SF 125.7577885 MHz  
WDW EM  
SSB 0  
LB 1.00 Hz  
GB 0  
PC 1.40

LYL01022

# <sup>1</sup>H-NMR (500 MHz, CDCl<sub>3</sub>)

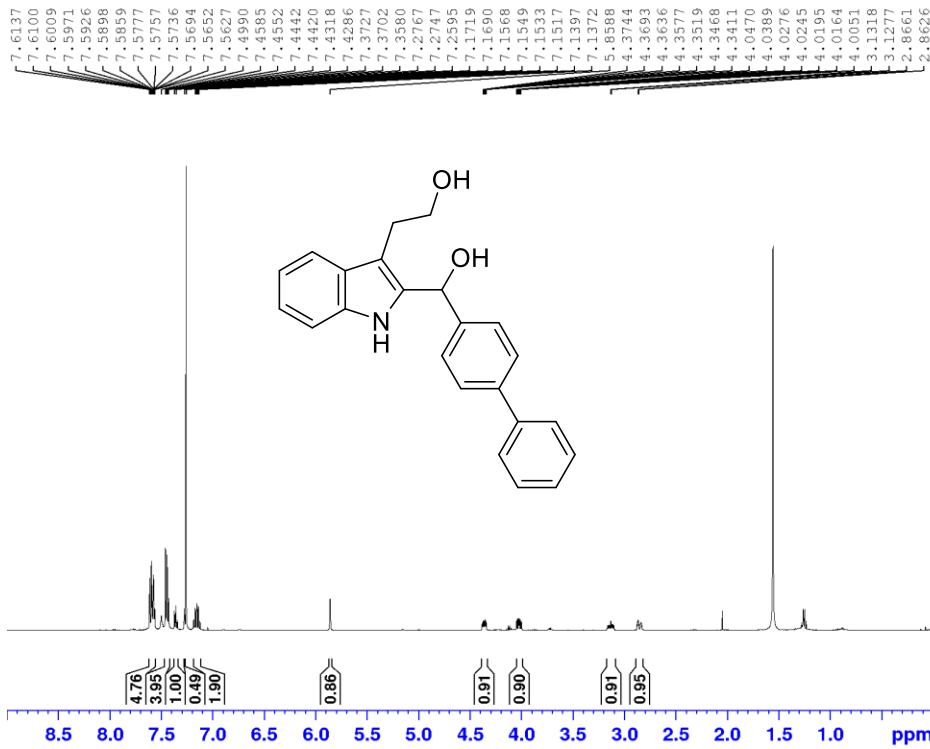

Current Data Parameters  
NAME LYL01023  
EXPNO 1  
PROCNO 1

F2 - Acquisition Parameters  
Date\_ 20230704  
Time 10.39 h  
INSTRUM Avance  
PROBHD Z151574\_0127 ( )  
PULPROG zg30  
TD 65536  
SOLVENT CDCl3  
NS 16  
DS 2  
SWH 10000.000 Hz  
FIDRES 0.305176 Hz  
AQ 3.2767999 sec  
RG 101  
DW 50.000 usec  
DE 11.14 usec  
TE 298.0 K  
D1 1.00000000 sec  
TD0 1  
SFO1 500.1330883 MHz  
NUC1 1H  
P0 2.67 usec  
P1 8.00 usec  
PLW1 25.47599983 W

F2 - Processing parameters  
SI 65536  
SF 500.1330117 MHz  
WDW EM  
SSB 0  
LB 0.30 Hz  
GB 0  
PC 1.00

LYL01023

# <sup>13</sup>C-NMR (125 MHz, CDCl<sub>3</sub>)

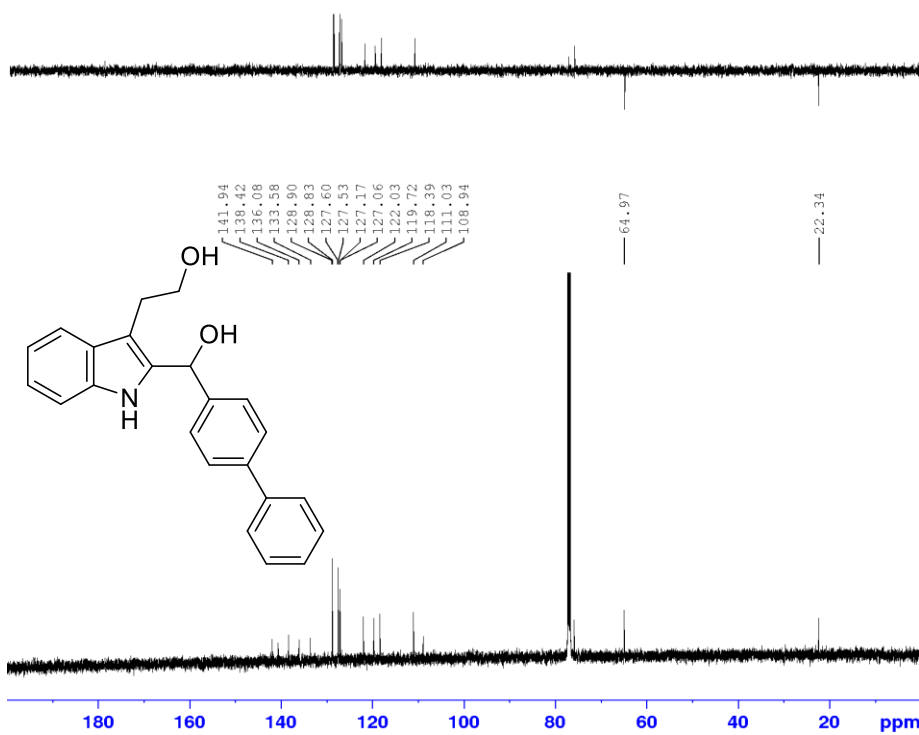

Current Data Parameters  
NAME LYL01023  
EXPNO 2  
PROCNO 1

F2 - Acquisition Parameters  
Date\_ 20230704  
Time 16.40 h  
INSTRUM Avance  
PROBHD Z151574\_0127 ( )  
PULPROG zgpg30  
TD 65536  
SOLVENT CDCl3  
NS 1280  
DS 4  
SWH 30120.482 Hz  
FIDRES 0.919204 Hz  
AQ 1.0878977 sec  
RG 101  
DW 16.600 usec  
DE 6.50 usec  
TE 298.0 K  
D1 2.00000000 sec  
D11 0.03000000 sec  
TD0 1  
SFO1 125.7703643 MHz  
NUC1 13C  
P0 3.00 usec  
P1 9.00 usec  
PLW1 113.5400092 W  
SFO2 500.1320005 MHz  
NUC2 1H  
CPDPRG2 waltz65  
PCPD2 80.00 usec  
PLW2 25.47599983 W  
PLW12 0.25476000 W  
PLW13 0.12814000 W

F2 - Processing parameters  
SI 32768  
SF 125.7577885 MHz  
WDW EM  
SSB 0  
LB 1.00 Hz  
GB 0  
PC 1.40

LYL01023

# <sup>1</sup>H-NMR (500 MHz, CDCl<sub>3</sub>)

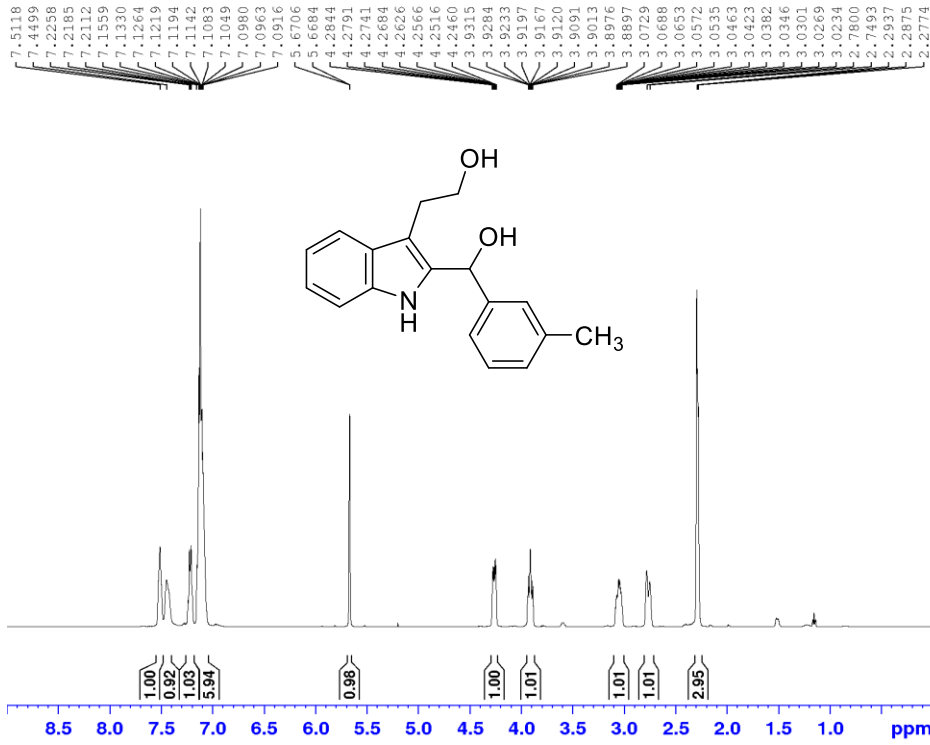

Current Data Parameters  
NAME LYL01024  
EXPNO 1  
PROCNO 1

F2 - Acquisition Parameters  
Date\_ 20230619  
Time 16.54 h  
INSTRUM Avance  
PROBHD Z151574\_0127 ( (   
PULPROG zg30  
TD 65536  
SOLVENT CDCl3  
NS 16  
DS 2  
SWH 10000.000 Hz  
FIDRES 0.305176 Hz  
AQ 3.2767999 sec  
RG 45.2174  
DW 50.000 usec  
DE 11.14 usec  
TE 298.0 K  
TD0 1  
D1 1.00000000 sec  
SFO1 500.1330883 MHz  
NUC1 1H  
P0 2.67 usec  
P1 8.00 usec  
PLW1 25.47599983 W

F2 - Processing parameters  
SI 65536  
SF 500.1300630 MHz  
WDW EM  
SSB 0  
LB 0.30 Hz  
GB 9  
PC 1.00

LYL01024

# <sup>13</sup>C-NMR (125 MHz, CDCl<sub>3</sub>)

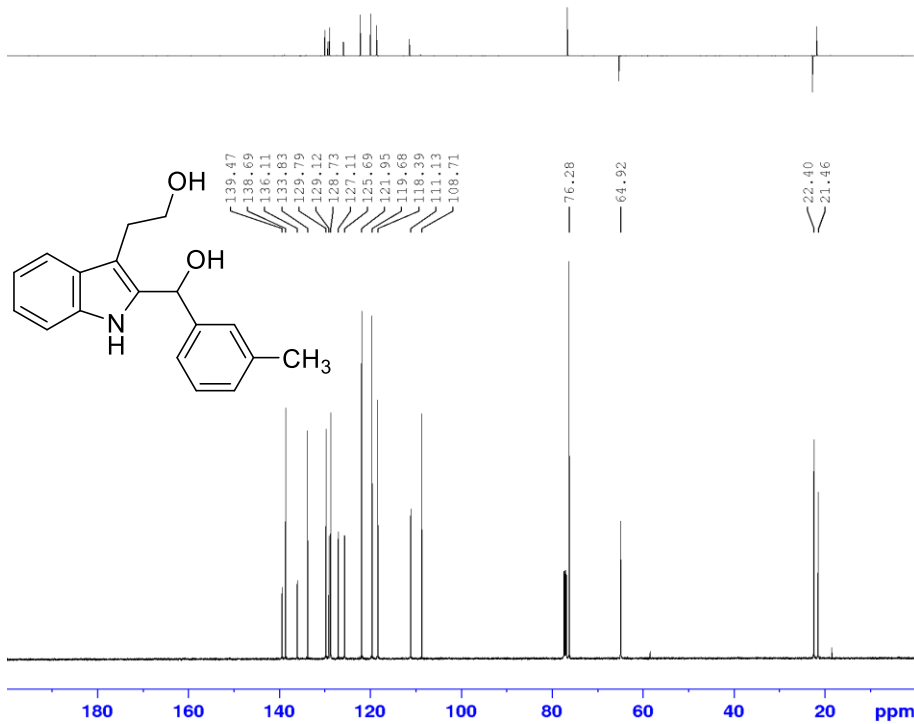

Current Data Parameters  
NAME LYL01024  
EXPNO 2  
PROCNO 1

F2 - Acquisition Parameters  
Date\_ 20230619  
Time 22.10 h  
INSTRUM Avance  
PROBHD Z151574\_0127 ( (   
PULPROG zgpg30  
TD 65536  
SOLVENT CDCl3  
NS 1024  
DS 4  
SWH 30120.482 Hz  
FIDRES 0.919204 Hz  
AQ 1.0878977 sec  
RG 101  
DW 16.600 usec  
DE 6.50 usec  
TE 298.0 K  
D1 2.00000000 sec  
D11 0.03000000 sec  
TD0 1  
SFO1 125.7703643 MHz  
NUC1 13C  
P0 3.00 usec  
P1 9.00 usec  
PLW1 113.54000092 W  
SFO2 500.1320005 MHz  
NUC2 1H  
PCPDPRG2 waltz65  
PCPD2 80.00 usec  
PLW2 25.47599983 W  
PLW12 0.25476000 W  
PLW13 0.12814000 W

F2 - Processing parameters  
SI 32768  
SF 125.7577885 MHz  
WDW EM  
SSB 0  
LB 1.00 Hz  
GB 0  
PC 1.40

LYL01024

# <sup>1</sup>H-NMR (500 MHz, CDCl<sub>3</sub>)

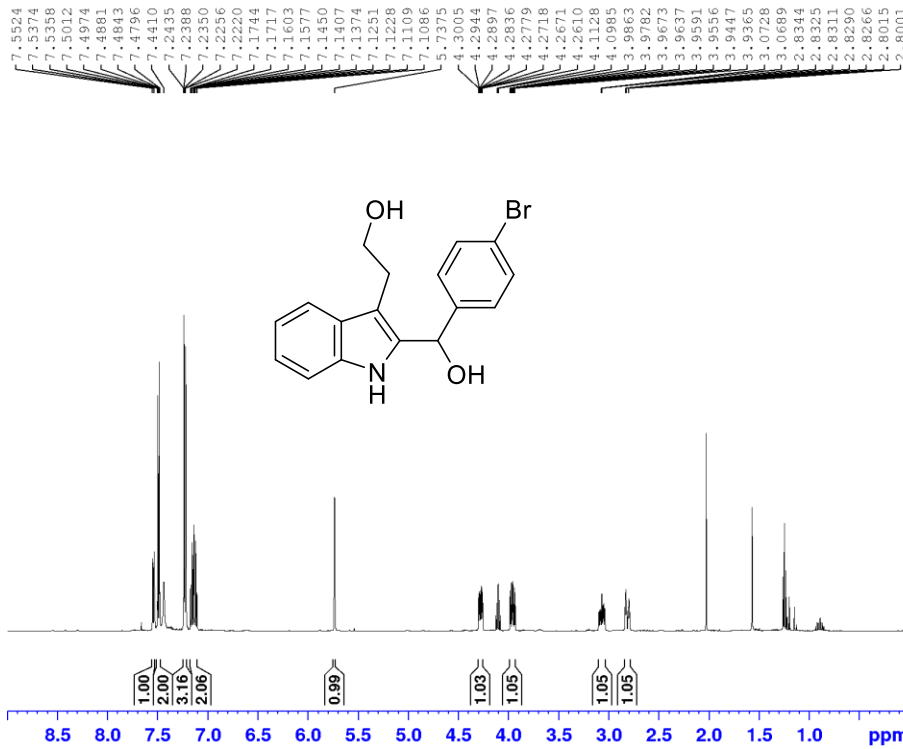

Current Data Parameters  
NAME LYL01027  
EXPNO 1  
PROCNO 1

F2 - Acquisition Parameters  
Date\_ 20230707  
Time 15.29 h  
INSTRUM Avance  
PROBHD Z151574\_0127 (zg30)  
PULPROG zg30  
TD 65536  
SOLVENT CDCl3  
NS 16  
DS 2  
SWH 10000.000 Hz  
FIDRES 0.305176 Hz  
AQ 3.2767999 sec  
RG 101  
DW 50.000 usec  
DE 11.14 usec  
TE 298.0 K  
D1 1.0000000 sec  
TD0 1  
SFO1 500.1330883 MHz  
NUC1 1H  
P0 2.67 usec  
P1 8.00 usec  
PLW1 25.47599983 W

F2 - Processing parameters  
SI 65536  
SF 500.1300214 MHz  
WDW EM  
SSB 0  
LB 0.30 Hz  
GB  
PC 1.00

LYL01027

# <sup>13</sup>C-NMR (125 MHz, CDCl<sub>3</sub>)

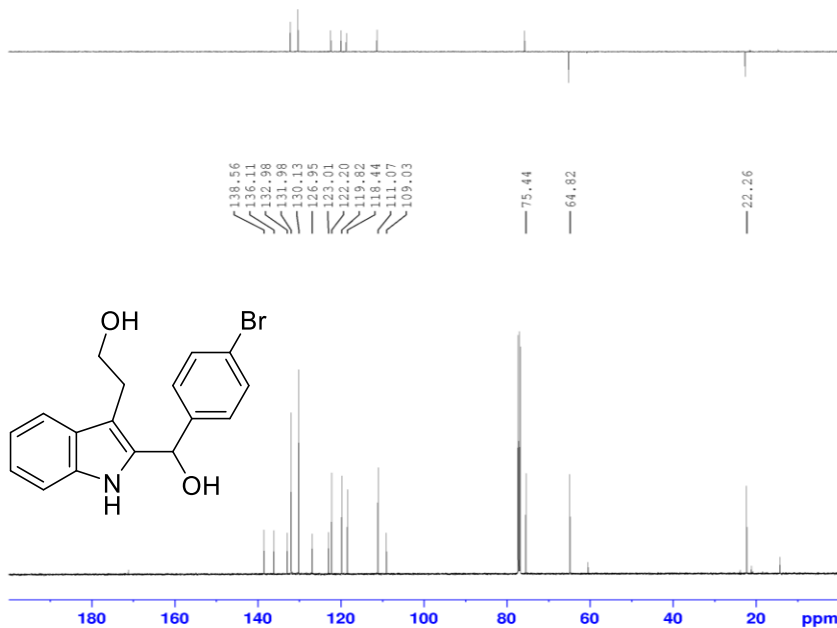

Current Data Parameters  
NAME LYL01027  
EXPNO 2  
PROCNO 1

F2 - Acquisition Parameters  
Date\_ 20230707  
Time 17.40 h  
INSTRUM Avance  
PROBHD Z151574\_0127 (zgpg30)  
PULPROG zgpg30  
TD 65536  
SOLVENT CDCl3  
NS 512  
DS 4  
SWH 30120.482 Hz  
FIDRES 0.919204 Hz  
AQ 1.0878977 sec  
RG 101  
DW 16.600 usec  
DE 6.50 usec  
TE 298.0 K  
D1 2.0000000 sec  
D11 0.0300000 sec  
TD0 1  
SFO1 125.7703643 MHz  
NUC1 13C  
P0 3.00 usec  
P1 9.00 usec  
PLW1 113.5400093 W  
SFO2 500.1320005 MHz  
CPDPRG12 waltz65  
PCPD2 80.00 usec  
PLW2 25.47599983 W  
PLW12 0.25476000 W  
PLW13 0.12814000 W

F2 - Processing parameters  
SI 32768  
SF 125.7577885 MHz  
WDW EM  
SSB 0  
LB 1.00 Hz  
GB 0  
PC 1.40

LYL01027

# <sup>1</sup>H-NMR (500 MHz, CDCl<sub>3</sub>)

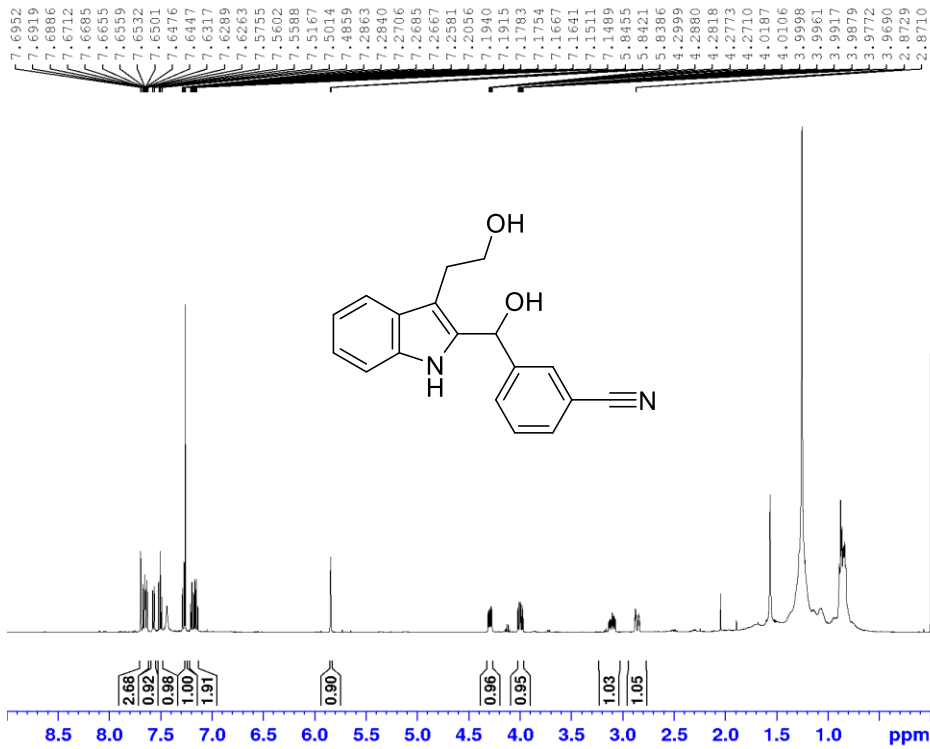

Current Data Parameters  
NAME LYL01028  
EXPNO 1  
PROCNO 1

F2 - Acquisition Parameters  
Date\_ 20230629  
Time 17.57 h  
INSTRUM Avance  
PROBHD Z151574\_0127 ( )  
PULPROG zg30  
TD 65536  
SOLVENT cdcl3  
NS 16  
DS 2  
SWH 10000.000 Hz  
FIDRES 0.305176 Hz  
AQ 3.2767999 sec  
RG 101  
DN 50.000 usec  
DE 11.14 usec  
TE 298.0 K  
D1 1.00000000 sec  
TDO 1  
SFO1 500.1330883 MHz  
NUC1 1H  
P0 2.67 usec  
P1 8.00 usec  
PLW1 25.47599983 W

F2 - Processing parameters  
SI 65536  
SF 500.1300124 MHz  
WDW EM  
SSB 0  
LB 0.30 Hz  
GB 0  
PC 1.00

LYL01028

# <sup>13</sup>C-NMR (125 MHz, CDCl<sub>3</sub>)

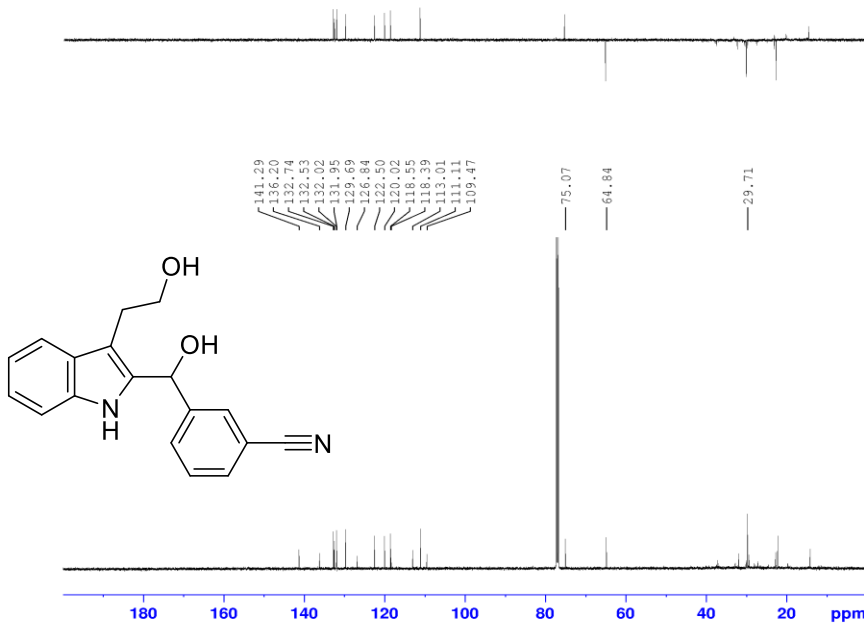

Current Data Parameters  
NAME LYL01028  
EXPNO 2  
PROCNO 1

F2 - Acquisition Parameters  
Date\_ 20230629  
Time 23.27 h  
INSTRUM Avance  
PROBHD Z151574\_0127 ( )  
PULPROG zgpg30  
TD 65536  
SOLVENT cdcl3  
NS 1280  
DS 4  
SWH 30120.482 Hz  
FIDRES 0.919204 Hz  
AQ 1.0878977 sec  
RG 101  
DN 16.600 usec  
DE 6.50 usec  
TE 298.0 K  
D1 2.00000000 sec  
D11 0.03000000 sec  
TDO 1  
SFO1 125.7703643 MHz  
NUC1 13C  
P0 3.00 usec  
P1 9.00 usec  
PLW1 113.5400092 W  
SFO2 500.1320005 MHz  
NUC2 1H  
CPDPRG[2] waltz65  
PCPD2 80.00 usec  
PLW2 25.47599983 W  
PLW12 0.25476000 W  
PLW13 0.12814000 W

F2 - Processing parameters  
SI 32768  
SF 125.7577885 MHz  
WDW EM  
SSB 0  
LB 1.00 Hz  
GB 0  
PC 1.40

LYL01028

# <sup>1</sup>H-NMR (500 MHz, CDCl<sub>3</sub>)

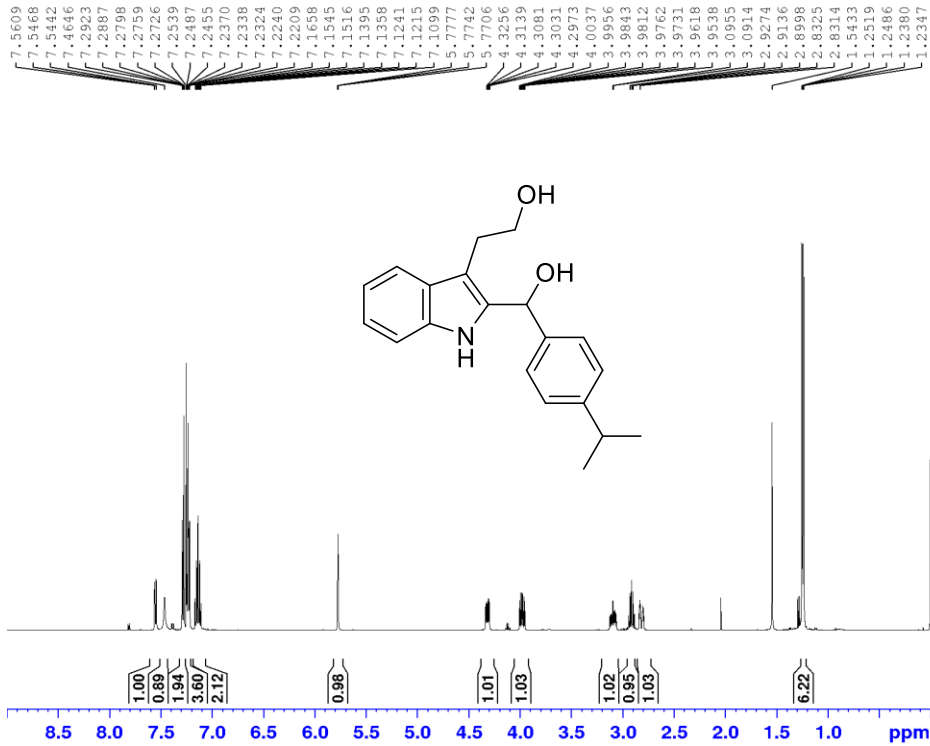

Current Data Parameters  
NAME LYL01029  
EXPNO 1  
PROCNO 1

F2 - Acquisition Parameters  
Date\_ 20230626  
Time 15.25 h  
INSTRUM Avance  
PROBHD Z151574\_0127 ( )  
PULPROG zg30  
TD 6536  
SOLVENT CDCl3  
NS 16  
DS 2  
SWH 10000.000 Hz  
FIDRES 0.305176 Hz  
AQ 3.2767999 sec  
RG 101  
DW 50.000 usec  
DE 11.14 usec  
TE 298.0 K  
D1 1.00000000 sec  
TDO 1  
SFO1 500.1330883 MHz  
NUC1 1H  
P0 2.67 usec  
P1 8.00 usec  
PLW1 25.47599983 W

F2 - Processing parameters  
SI 6536  
SF 500.1300145 MHz  
WDW EM  
SSB 0  
LB 0.30 Hz  
GB 0  
PC 1.00

LYL01029

# <sup>13</sup>C-NMR (125 MHz, CDCl<sub>3</sub>)

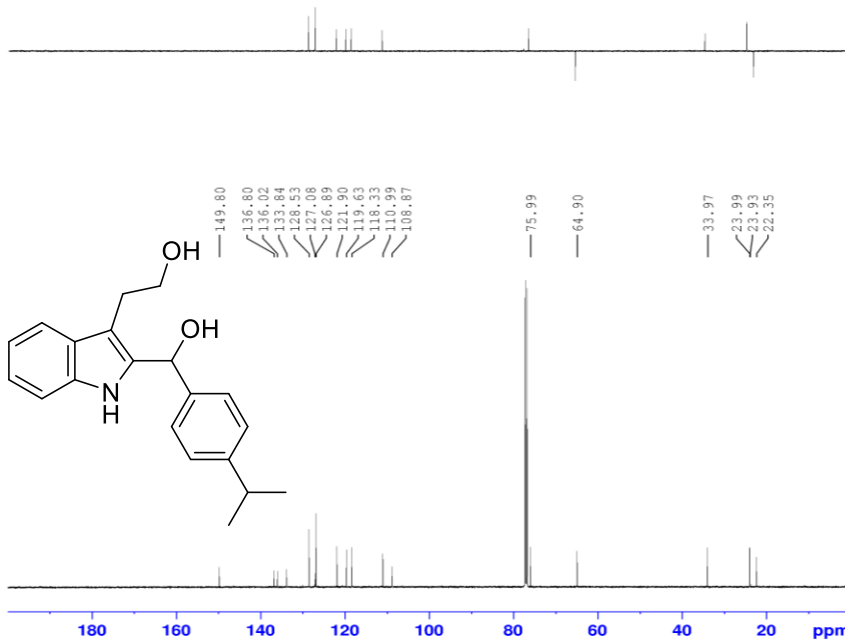

Current Data Parameters  
NAME LYL01029  
EXPNO 2  
PROCNO 1

F2 - Acquisition Parameters  
Date\_ 20230626  
Time 17.11 h  
INSTRUM Avance  
PROBHD Z151574\_0127 ( )  
PULPROG zgpg30  
TD 6536  
SOLVENT CDCl3  
NS 1024  
DS 4  
SWE 30120.482 Hz  
FIDRES 0.918204 Hz  
AQ 1.0878977 sec  
RG 101  
DW 18.600 usec  
DE 6.50 usec  
TE 298.0 K  
D1 2.00000000 sec  
D11 0.03000000 sec  
TDO 1  
SFO1 125.7703643 MHz  
NUC1 13C  
P0 3.00 usec  
P1 9.00 usec  
PLW1 113.54000092 W  
SFO2 500.1320005 MHz  
NUC2 1H  
CPDPRG2 waltz65  
PCPD2 80.00 usec  
PLW2 25.47599983 W  
PLW12 0.25476000 W  
PLW3 0.12814000 W

F2 - Processing parameters  
SI 32768  
SF 125.7577885 MHz  
WDW EM  
SSB 0  
LB 1.00 Hz  
GB 0  
PC 1.40

LYL01029

# <sup>1</sup>H-NMR (500 MHz, CDCl<sub>3</sub>)

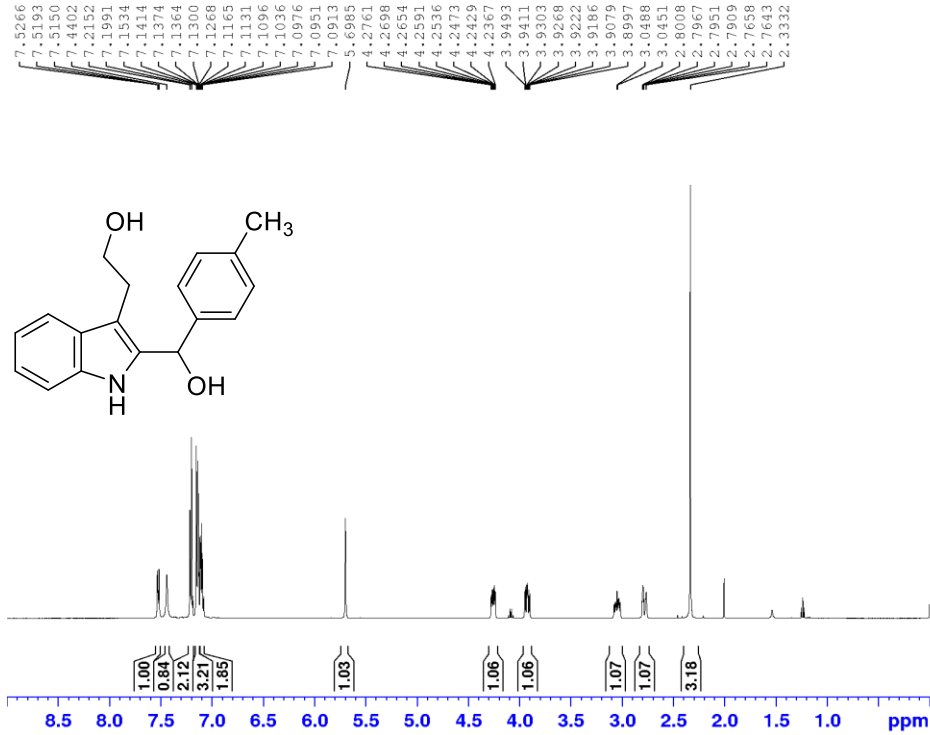

Current Data Parameters  
NAME LYL01030-1  
EXPNO 1  
PROCNO 1

F2 - Acquisition Parameters  
Date\_ 20230714  
Time 9.41 h  
INSTRUM Avance  
PROBHD Z151574\_0127 (zg30)  
PULPROG zg30  
TD 65536  
SOLVENT CDCl3  
NS 16  
DS 2  
SWH 10000.000 Hz  
FIDRES 0.305176 Hz  
AQ 3.2767999 sec  
RG 52  
DW 50.004 usec  
DE 11.14 usec  
TE 298.0 K  
D1 1.00000000 sec  
TDO 1  
SFO1 500.1330883 MHz  
NUC1 1H  
PO 2.67 usec  
P1 8.00 usec  
PLW1 25.47599983 W

F2 - Processing parameters  
SI 65536  
SF 500.1300474 MHz  
WDW EM  
SSB 0  
LB 0.30 Hz  
GB 0  
PC 1.00

LYL01030-1

# <sup>13</sup>C-NMR (125 MHz, CDCl<sub>3</sub>)

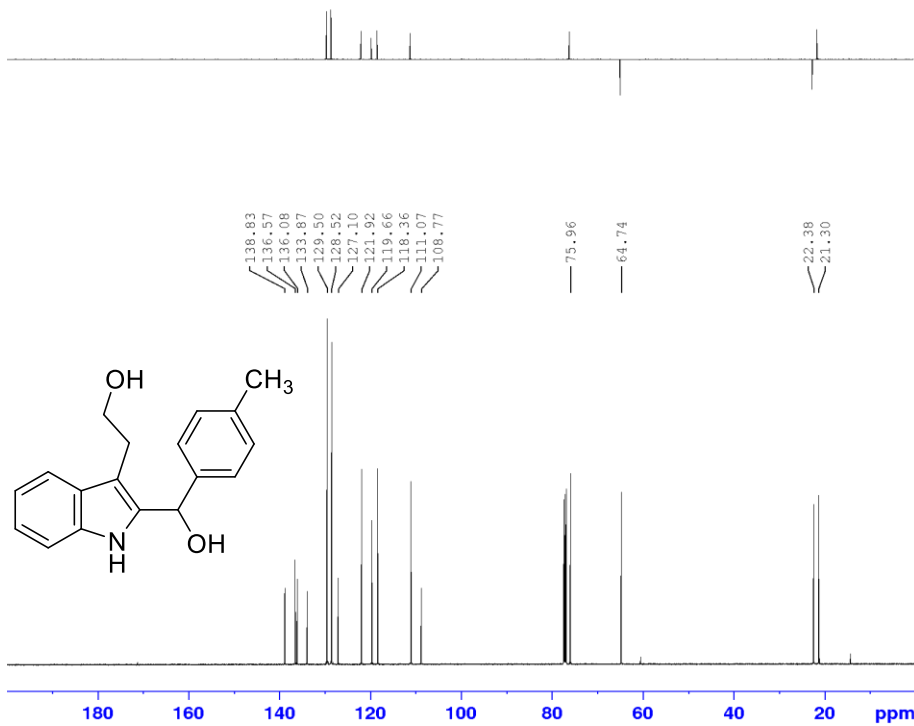

Current Data Parameters  
NAME LYL01030-1  
EXPNO 2  
PROCNO 1

F2 - Acquisition Parameters  
Date\_ 20230714  
Time 10.36 h  
INSTRUM Avance  
PROBHD Z151574\_0127 (zgpg30)  
PULPROG zgpg30  
TD 65536  
SOLVENT CDCl3  
NS 1024  
DS 4  
SWH 30120.482 Hz  
FIDRES 0.919204 Hz  
AQ 1.0878977 sec  
RG 101  
DW 16.600 usec  
DE 6.50 usec  
TE 298.0 K  
D1 2.00000000 sec  
D11 0.03000000 sec  
TDO 1  
SFO1 125.7703643 MHz  
NUC1 13C  
PO 3.00 usec  
P1 9.00 usec  
PLW1 113.5400092 W  
SFO2 500.1320005 MHz  
NUC2 1H  
CPDPRG2 waltz65  
PCPD2 80.00 usec  
PLW2 25.47599983 W  
PLW12 0.25476000 W  
PLW13 0.12814000 W

F2 - Processing parameters  
SI 32768  
SF 125.7577885 MHz  
WDW EM  
SSB 0  
LB 1.00 Hz  
GB 0  
PC 1.40

LYL01030-1

# <sup>1</sup>H-NMR (500 MHz, CDCl<sub>3</sub>)

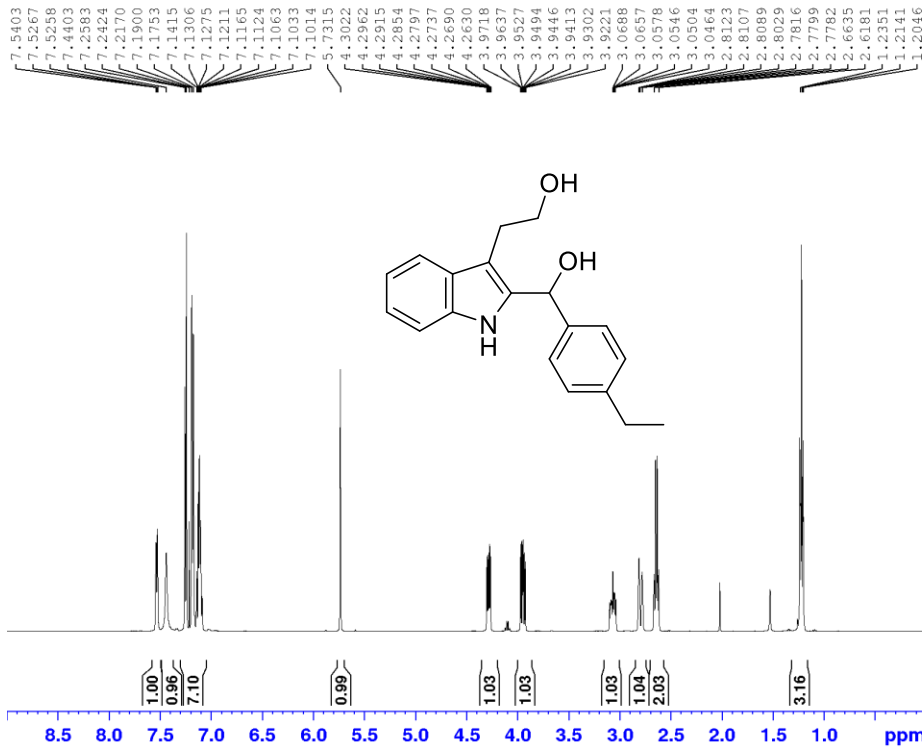

Current Data Parameters  
NAME LYL01031-1  
EXPNO 1  
PROCNO 1

F2 - Acquisition Parameters  
Date\_ 20230626  
Time 15.29 h  
INSTRUM Avance  
PROBHD Z151574\_0127 (zg30)  
PULPROG zg30  
TD 65536  
SOLVENT CDCl3  
NS 16  
DS 2  
SWH 10000.000 Hz  
FIDRES 0.305176 Hz  
AQ 3.2767999 sec  
RG 71.7241  
DW 50.000 usec  
DE 11.14 usec  
TE 298.0 K  
D1 1.00000000 sec  
TDO 1  
SFO1 500.1330883 MHz  
NUC1 1H  
P0 2.67 usec  
P1 8.00 usec  
PLW1 25.47599983 W

F2 - Processing parameters  
SI 65536  
SF 500.1300327 MHz  
WDW EM  
SSB 0  
LB 0.30 Hz  
GB 0  
PC 1.00

LYL0100031-1

# <sup>13</sup>C-NMR (125 MHz, CDCl<sub>3</sub>)

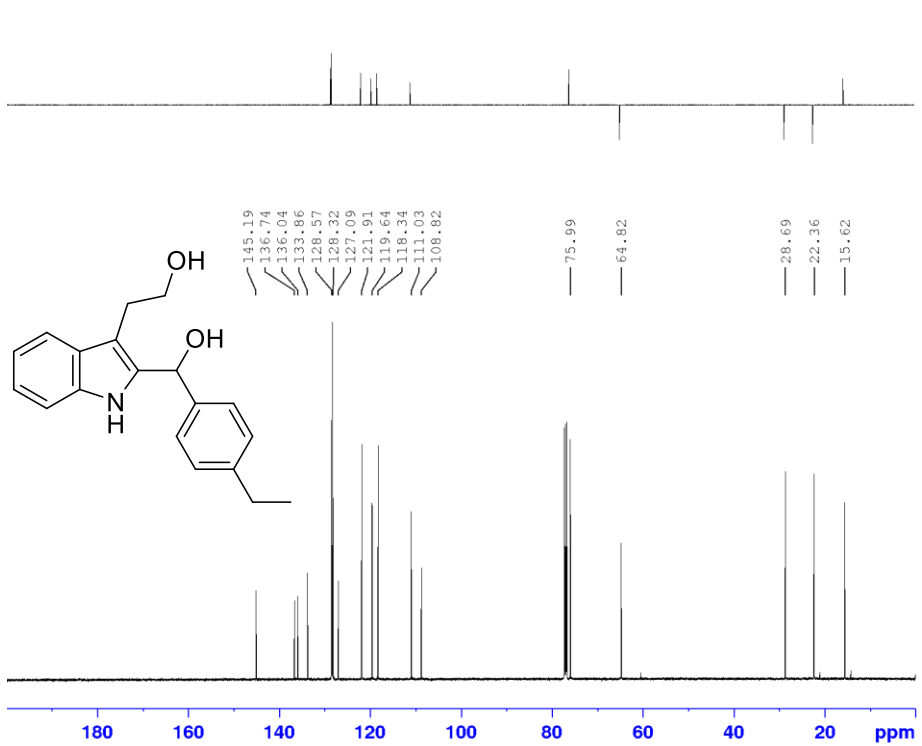

Current Data Parameters  
NAME LYL01031-1  
EXPNO 2  
PROCNO 1

F2 - Acquisition Parameters  
Date\_ 20230626  
Time 18.23 h  
INSTRUM Avance  
PROBHD Z151574\_0127 (zgpg30)  
PULPROG zgpg30  
TD 65536  
SOLVENT CDCl3  
NS 1024  
DS 4  
SWH 30120.482 Hz  
FIDRES 0.919204 Hz  
AQ 1.0878977 sec  
RG 101  
DW 16.600 usec  
DE 6.50 usec  
TE 298.0 K  
D1 2.00000000 sec  
D11 0.03000000 sec  
TDO 1  
SFO1 125.7703643 MHz  
NUC1 13C  
P0 3.00 usec  
P1 9.00 usec  
PLW1 113.54000092 W  
SFO2 500.1320005 MHz  
NUC2 1H  
CPDPRG2 waltz65  
PCPD2 80.00 usec  
PLW2 25.47599983 W  
PLW12 0.25476000 W  
PLW13 0.12814000 W

F2 - Processing parameters  
SI 32768  
SF 125.7577885 MHz  
WDW EM  
SSB 0  
LB 1.00 Hz  
GB 0  
PC 1.40

LYL01031-1

# <sup>1</sup>H-NMR (500 MHz, CDCl<sub>3</sub>)

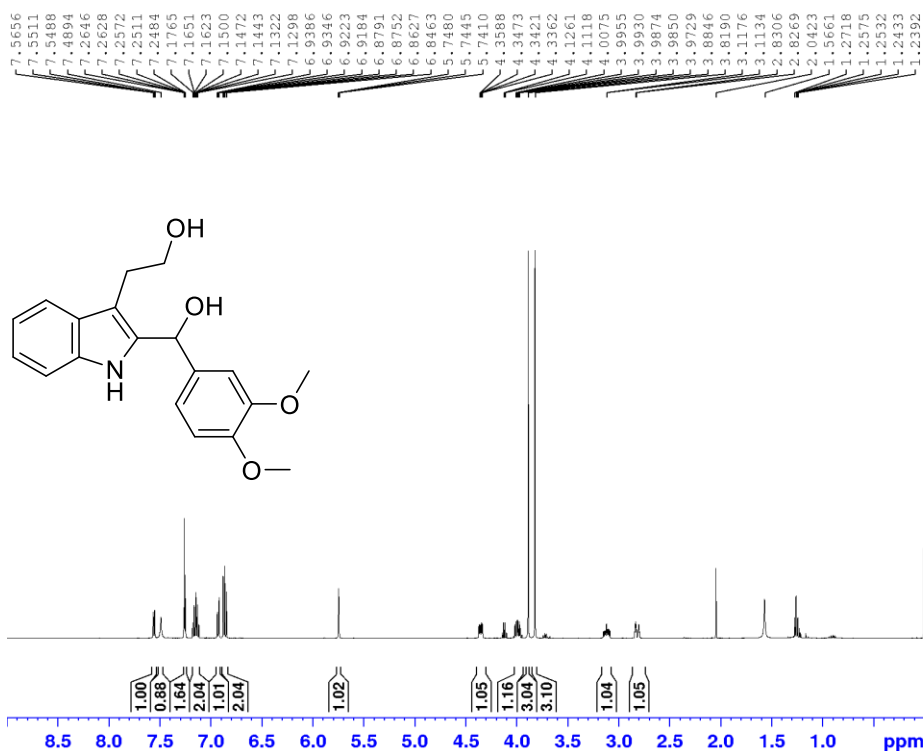

Current Data Parameters  
NAME LYL01032  
EXPNO 1  
PROCNO 1

F2 - Acquisition Parameters  
Date\_ 20230704  
Time\_ 10.44 h  
INSTRUM Avance  
PROBHD Z151574\_0127 (zg30)  
PULPROG zg30  
TD 65536  
SOLVENT CDCl3  
NS 16  
DS 2  
SWH 10000.000 Hz  
FIDRES 0.305176 Hz  
AQ 3.2767999 sec  
RG 101  
DW 50.000 usec  
DE 11.14 usec  
TE 298.0 K  
D1 1.00000000 sec  
TDO 1  
SFO1 500.1330883 MHz  
NUC1 1H  
PO 2.67 usec  
P1 8.00 usec  
PLW1 25.47599983 W

F2 - Processing parameters  
SI 65536  
SF 500.1300127 MHz  
WDW EM  
SSB 0  
LB 0.30 Hz  
GB 0  
PC 1.00

LYL01032

# <sup>13</sup>C-NMR (125 MHz, CDCl<sub>3</sub>)

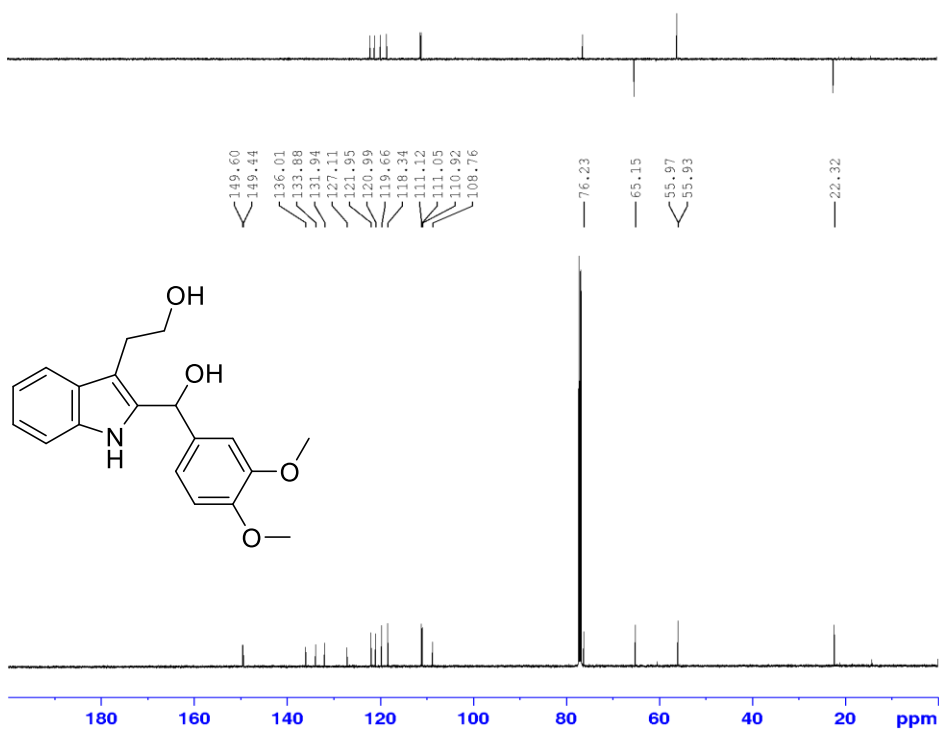

Current Data Parameters  
NAME LYL01032  
EXPNO 2  
PROCNO 1

F2 - Acquisition Parameters  
Date\_ 20230704  
Time\_ 21.34 h  
INSTRUM Avance  
PROBHD Z151574\_0127 (zgpg30)  
PULPROG zgpg30  
TD 65536  
SOLVENT CDCl3  
NS 1024  
DS 4  
SWH 30120.482 Hz  
FIDRES 0.919204 Hz  
AQ 1.0878977 sec  
RG 101  
DW 16.600 usec  
DE 6.50 usec  
TE 298.0 K  
D1 2.00000000 sec  
D11 0.03000000 sec  
TDO 1  
SFO1 125.7703643 MHz  
NUC1 13C  
PO 3.00 usec  
P1 9.00 usec  
PLW1 113.5400092 W  
SFO2 500.1320005 MHz  
NUC2 1H  
CPDPRG2 waltz65  
PCPD2 80.00 usec  
PLW2 25.47599983 W  
PLW12 0.25476000 W  
PLW13 0.12814000 W

F2 - Processing parameters  
SI 32768  
SF 125.7577825 MHz  
WDW EM  
SSB 0  
LB 1.00 Hz  
GB 0  
PC 1.40

LYL01032

<sup>1</sup>H-NMR (500 MHz, CDCl<sub>3</sub>)

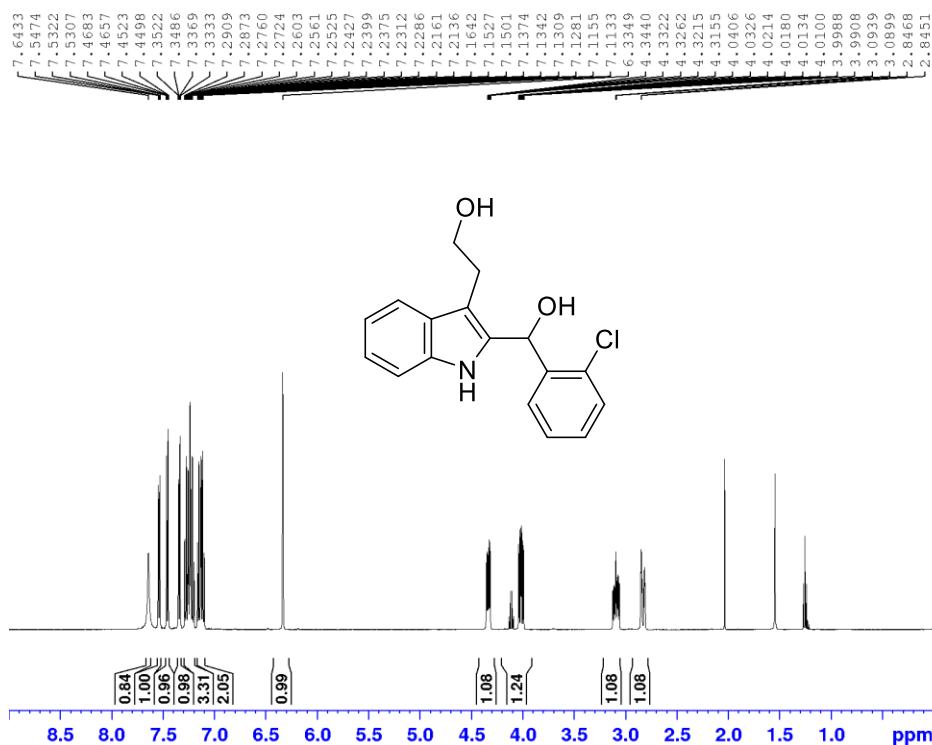

Current Data Parameters  
 NAME LYL01034  
 EXPNO 1  
 PROCNO 1

F2 - Acquisition Parameters  
 Date\_ 20230718  
 Time 10.56 h  
 INSTRUM Avance  
 PROBHD Z151574\_0127 ( )  
 PULPROG zg30  
 TD 65536  
 SOLVENT CDCl3  
 NS 16  
 DS 2  
 SWH 10000.000 Hz  
 FIDRES 0.305176 Hz  
 AQ 3.2767999 sec  
 RG 101  
 DW 50.000 usec  
 DE 11.14 usec  
 TE 298.0 K  
 D1 1.00000000 sec  
 TD0 1  
 SFO1 500.1330883 MHz  
 NUC1 1H  
 P0 2.67 usec  
 P1 8.00 usec  
 PLW1 25.47599983 W

F2 - Processing parameters  
 SI 65536  
 SF 500.1330200 MHz  
 WDW EM  
 SSB 0  
 LB 0.30 Hz  
 GB 0  
 PC 1.00

LYL01034

<sup>13</sup>C-NMR (125 MHz, CDCl<sub>3</sub>)

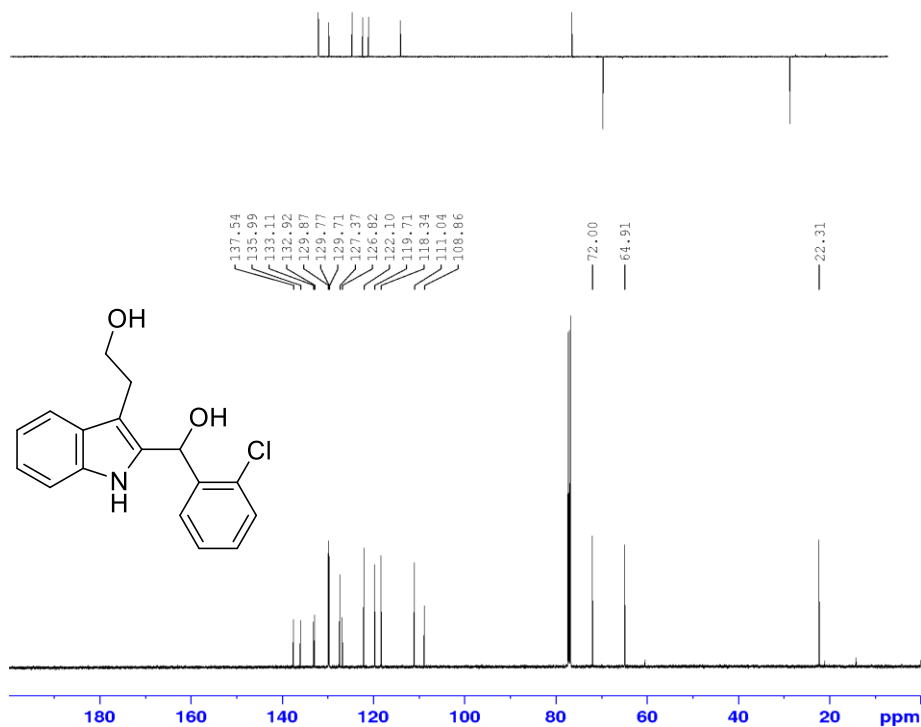

Current Data Parameters  
 NAME LYL01034  
 EXPNO 2  
 PROCNO 1

F2 - Acquisition Parameters  
 Date\_ 20230718  
 Time 17.13 h  
 INSTRUM Avance  
 PROBHD Z151574\_0127 ( )  
 PULPROG zgpg30  
 TD 65536  
 SOLVENT CDCl3  
 NS 512  
 DS 4  
 SWH 30120.482 Hz  
 FIDRES 0.919204 Hz  
 AQ 1.0878977 sec  
 RG 101  
 DW 16.600 usec  
 DE 6.50 usec  
 TE 298.0 K  
 D1 2.00000000 sec  
 D11 0.03000000 sec  
 TD0 1  
 SFO1 125.7703643 MHz  
 NUC1 13C  
 P0 3.00 usec  
 P1 8.00 usec  
 PLW1 113.54000092 W  
 SFO2 500.1320005 MHz  
 NUC2 1H  
 CPDPRG2 waltz65  
 PCPD2 80.00 usec  
 PLW2 25.47599983 W  
 PLW12 0.25476000 W  
 PLW13 0.12814000 W

F2 - Processing parameters  
 SI 32768  
 SF 125.7577885 MHz  
 WDW EM  
 SSB 0  
 LB 1.00 Hz  
 GB 0  
 PC 1.40

LYL01034

# <sup>1</sup>H-NMR (500 MHz, CDCl<sub>3</sub>)

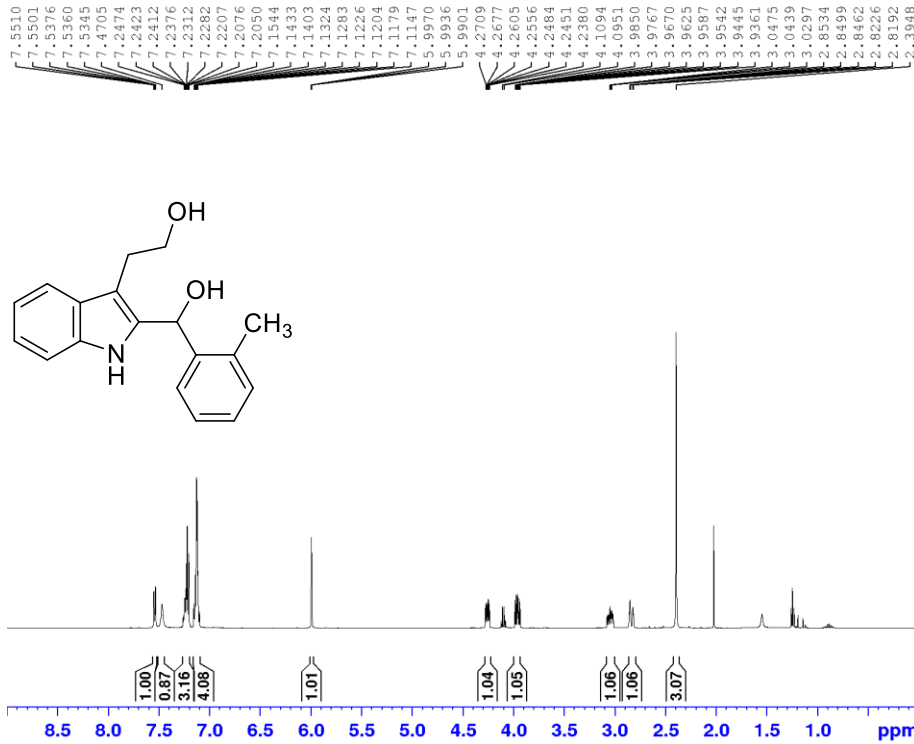

Current Data Parameters  
NAME LYL01035-1  
EXPNO 1  
PROCNO 1

F2 - Acquisition Parameters  
Date\_ 20230714  
Time 13.25 h  
INSTRUM Avance  
PROBHD Z151574\_0127 ( (   
PULPROG zg30  
TD 65536  
SOLVENT cdcl3  
NS 16  
DS 2  
SWH 10000.000 Hz  
FIDRES 0.305176 Hz  
AQ 3.2767999 sec  
RG 101  
DM 50.000 usec  
DE 11.14 usec  
TE 298.0 K  
D1 1.00000000 sec  
TD0 1  
SFO1 500.1330883 MHz  
NUC1 1H  
P0 2.67 usec  
P1 8.00 usec  
PLW1 25.47599983 W

F2 - Processing parameters  
SI 65536  
SF 500.1330272 MHz  
WDW EM  
SSB 0  
LB 0.30 Hz  
GB 0  
PC 1.00

LYL01035-1

# <sup>13</sup>C-NMR (125 MHz, CDCl<sub>3</sub>)

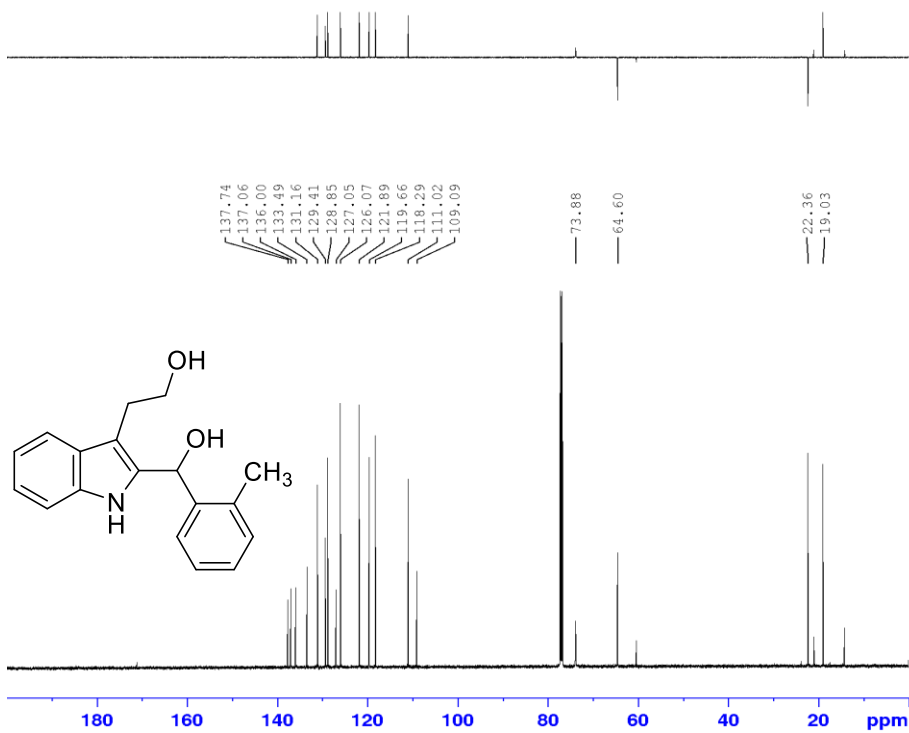

Current Data Parameters  
NAME LYL01035-1  
EXPNO 2  
PROCNO 1

F2 - Acquisition Parameters  
Date\_ 20230714  
Time 14.20 h  
INSTRUM Avance  
PROBHD Z151574\_0127 ( (   
PULPROG zgpg30  
TD 65536  
SOLVENT cdcl3  
NS 1024  
DS 4  
SWH 30120.482 Hz  
FIDRES 0.919204 Hz  
AQ 1.0878977 sec  
RG 101  
DM 16.600 usec  
DE 6.50 usec  
TE 298.0 K  
D1 2.00000000 sec  
D11 0.03000000 sec  
TD0 1  
SFO1 125.7703643 MHz  
NUC1 13C  
P0 3.00 usec  
P1 9.00 usec  
PLW1 113.54000092 W  
SFO2 500.1320005 MHz  
NUC2 1H  
CPDPRG2 waltz65  
PCPD2 80.00 usec  
PLW2 25.47599983 W  
PLW12 0.25476000 W  
PLW13 0.12814000 W

F2 - Processing parameters  
SI 32768  
SF 125.7577885 MHz  
WDW EM  
SSB 0  
LB 1.00 Hz  
GB 0  
PC 1.40

LYL01035-1

<sup>1</sup>H-NMR (500 MHz, CDCl<sub>3</sub>)

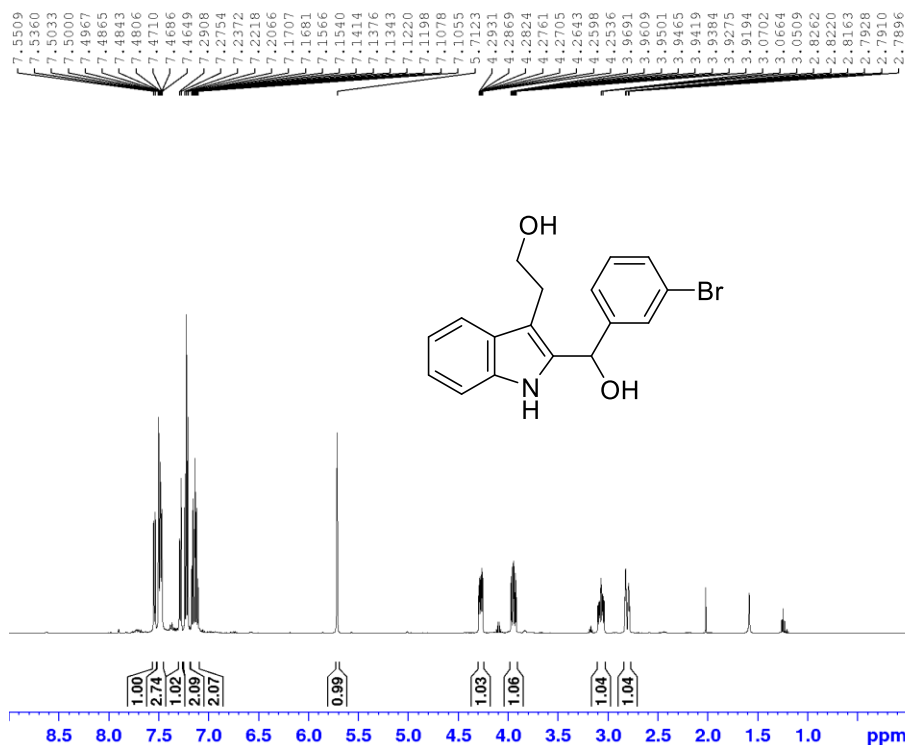

<sup>13</sup>C-NMR (125 MHz, CDCl<sub>3</sub>)

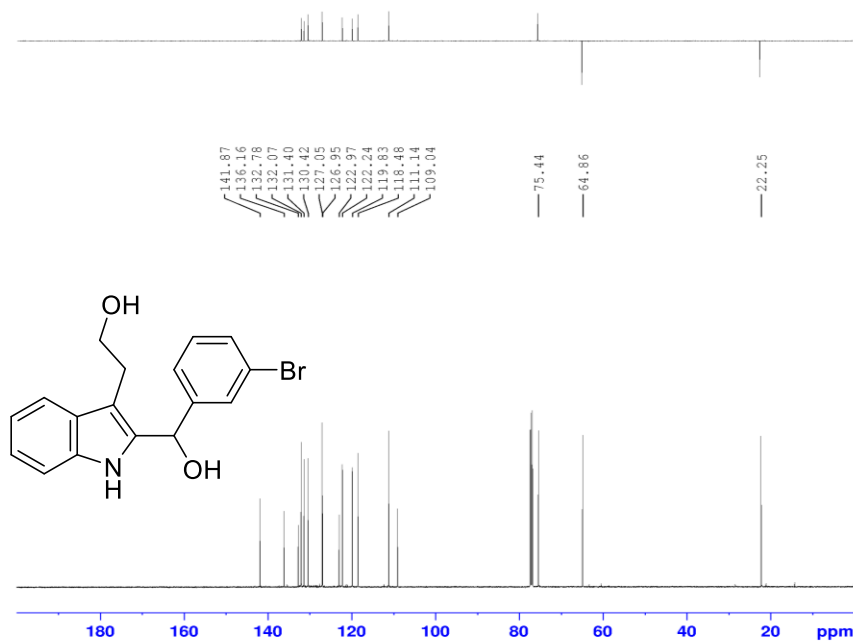

<sup>1</sup>H-NMR (500 MHz, CDCl<sub>3</sub>)

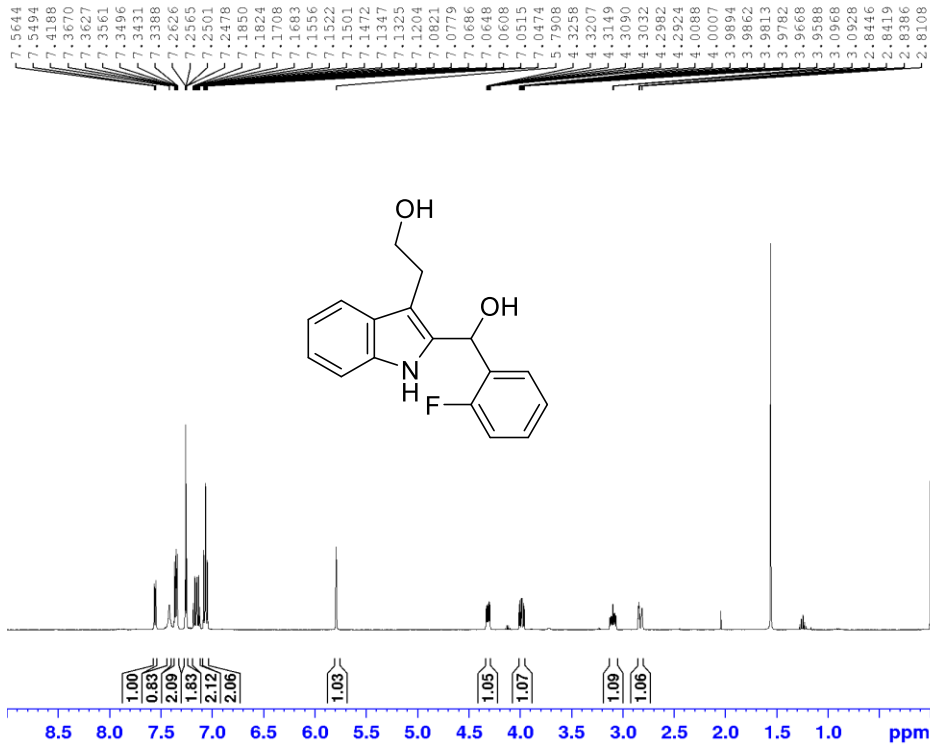

Current Data Parameters  
NAME LYL01040  
EXPNO 1  
PROCNO 1

F2 - Acquisition Parameters  
Date\_ 20230729  
Time 6.46 h  
INSTRUM Avance  
PROBHD Z151574\_0127 ( )  
PULPROG zg30  
TD 65536  
SOLVENT CDCl3  
NS 16  
DS 2  
SWH 10000.000 Hz  
FIDRES 0.305176 Hz  
AQ 3.2767999 sec  
RG 101  
DN 50.000 usec  
DE 11.14 usec  
TE 298.0 K  
D1 1.00000000 sec  
TDO 1  
SF01 500.1330883 MHz  
NUC1 1H  
P0 2.67 usec  
P1 8.00 usec  
PLW1 25.47599983 W

F2 - Processing parameters  
SI 65536  
SF 500.1300132 MHz  
WDW EM  
SSB 0  
LB 0.30 Hz  
GB 0  
PC 1.00

LYL01040

<sup>13</sup>C-NMR (125 MHz, CDCl<sub>3</sub>)

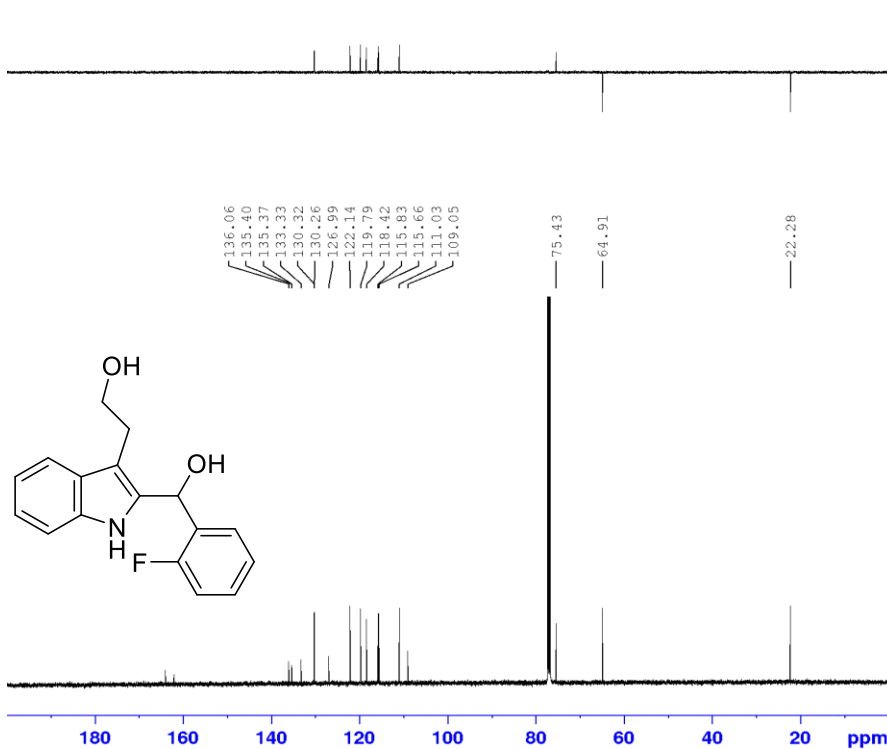

Current Data Parameters  
NAME LYL01040  
EXPNO 2  
PROCNO 1

F2 - Acquisition Parameters  
Date\_ 20230729  
Time 7.41 h  
INSTRUM Avance  
PROBHD Z151574\_0127 ( )  
PULPROG zgpg30  
TD 65536  
SOLVENT CDCl3  
NS 1024  
DS 4  
SWH 30120.482 Hz  
FIDRES 0.919204 Hz  
AQ 1.0878977 sec  
RG 101  
DW 16.600 usec  
DE 6.50 usec  
TE 298.0 K  
D1 2.00000000 sec  
D11 0.03000000 sec  
TDO 1  
SF01 125.7703643 MHz  
NUC1 13C  
P0 3.00 usec  
P1 9.00 usec  
PLW1 113.5400092 W  
SFO2 500.1320005 MHz  
NUC2 1H  
CPDPRG2 waltz65  
PCPD2 80.00 usec  
PLW2 25.47599983 W  
PLW12 0.25476000 W  
PLW13 0.12814000 W

F2 - Processing parameters  
SI 32768  
SF 125.7577885 MHz  
WDW EM  
SSB 0  
LB 1.00 Hz  
GB 0  
PC 1.40

LYL01040

# <sup>1</sup>H-NMR (500 MHz, CDCl<sub>3</sub>)

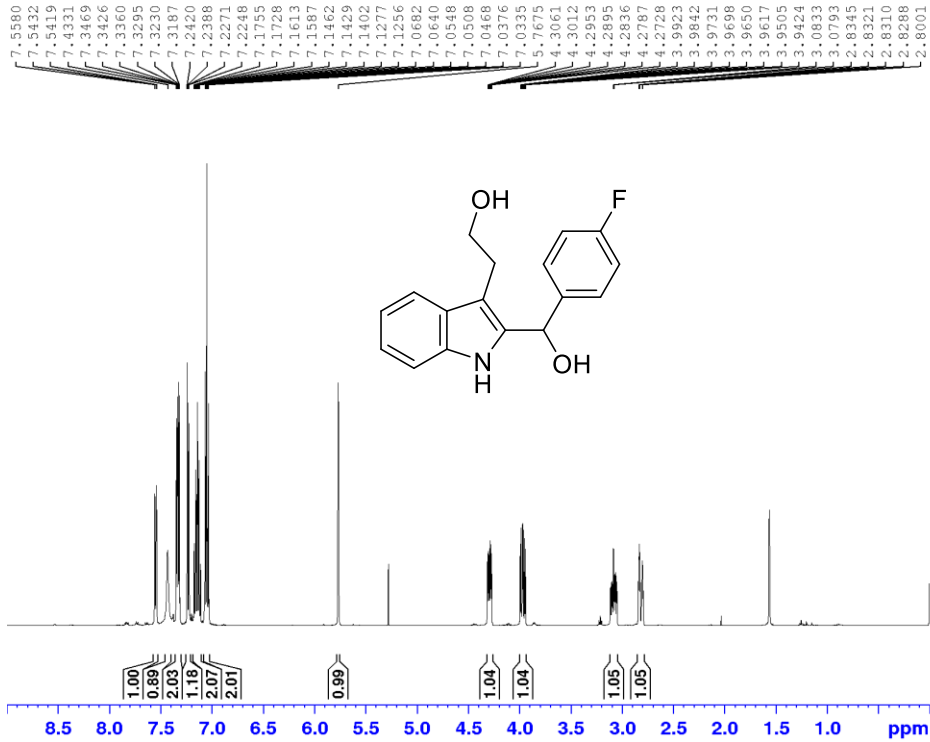

Current Data Parameters  
NAME LYL01041-0906  
EXPNO 1  
PROCNO 1

F2 - Acquisition Parameters  
Date\_ 20230906  
Time 11.53 h  
INSTRUM Avance  
PROBHD Z151574\_0127 ( )  
PULPROG zg30  
TD 65536  
SOLVENT CDCl3  
NS 16  
DS 2  
SWH 10000.000 Hz  
FIDRES 0.305176 Hz  
AQ 3.2767999 sec  
RG 101  
DW 50.000 usec  
DE 11.14 usec  
TE 296.1 K  
D1 1.00000000 sec  
TDO 1  
SF01 500.1330883 MHz  
NUC1 1H  
P0 2.67 usec  
P1 8.00 usec  
PLW1 25.47599983 W

F2 - Processing parameters  
SI 65536  
SF 500.1330220 MHz  
WDW EM  
SSB 0  
LB 0.30 Hz  
GB 0  
PC 1.00

LYL01041-0906

# <sup>13</sup>C-NMR (125 MHz, CDCl<sub>3</sub>)

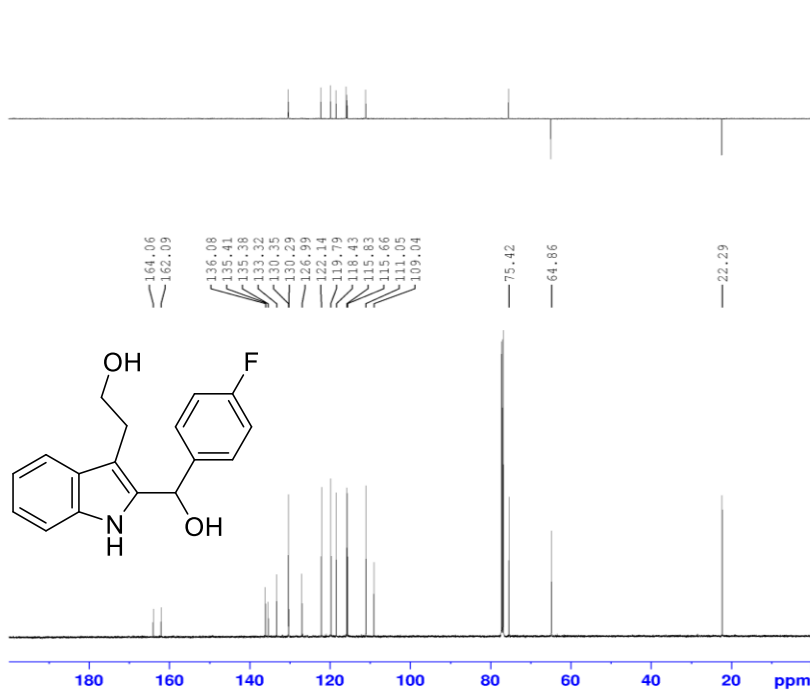

Current Data Parameters  
NAME LYL01041-0906  
EXPNO 2  
PROCNO 1

F2 - Acquisition Parameters  
Date\_ 20230906  
Time 12.48 h  
INSTRUM Avance  
PROBHD Z151574\_0127 ( )  
PULPROG zgpg30  
TD 65536  
SOLVENT CDCl3  
NS 1024  
DS 4  
SWH 30120.482 Hz  
FIDRES 0.319204 Hz  
AQ 1.0878977 sec  
RG 101  
DW 16.600 usec  
DE 6.50 usec  
TE 297.3 K  
D1 2.00000000 sec  
D11 0.03000000 sec  
TDO 1  
SF01 125.7703643 MHz  
NUC1 13C  
P0 3.00 usec  
P1 9.00 usec  
PLW1 113.54000092 W  
SFO2 500.1320000 MHz  
NUC2 1H  
CPDPRG12 waltz65  
PCPD2 80.00 usec  
PLW2 25.47599983 W  
PLW12 0.25476000 W  
PLW13 0.12814000 W

F2 - Processing parameters  
SI 32768  
SF 125.7577885 MHz  
WDW EM  
SSB 0  
LB 1.00 Hz  
GB 0  
PC 1.40

LYL01041-0906

# <sup>1</sup>H-NMR (500 MHz, CDCl<sub>3</sub>)

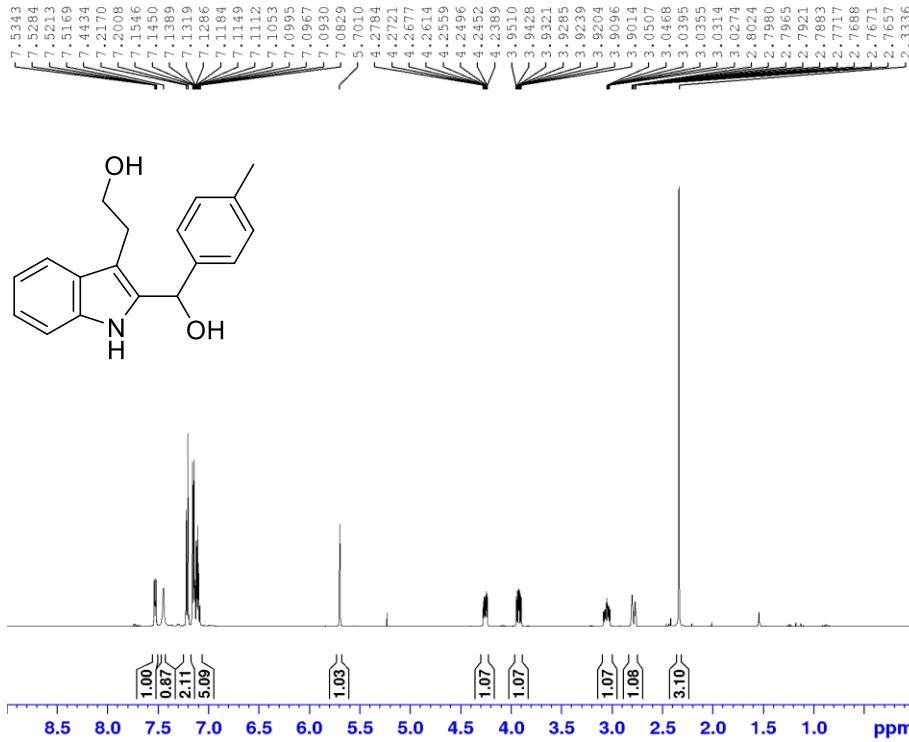

Current Data Parameters  
NAME LYL01045  
EXPNO 1  
PROCNO 1

F2 - Acquisition Parameters  
Date\_ 20230814  
Time\_ 4.55 h  
INSTRUM Avance  
PROBHD Z151574\_0127 (4  
PULPROG zg30  
TD 65536  
SOLVENT CDCl3  
NS 16  
DS 2  
SWH 10000.000 Hz  
FIDRES 0.305176 Hz  
AQ 3.2767999 sec  
RG 50.7317  
DW 50.000 usec  
DE 11.14 usec  
TE 296.9 K  
D1 1.00000000 sec  
SFO1 500.1330883 MHz  
NUC1 1H  
PO 2.67 usec  
P1 8.00 usec  
PLW1 25.47599983 W

F2 - Processing parameters  
SI 65536  
SF 500.1300461 MHz  
WDW EM  
SSB 0  
LB 0.30 Hz  
GB 0  
PC 1.00

LYL01045

# <sup>13</sup>C-NMR (125 MHz, CDCl<sub>3</sub>)

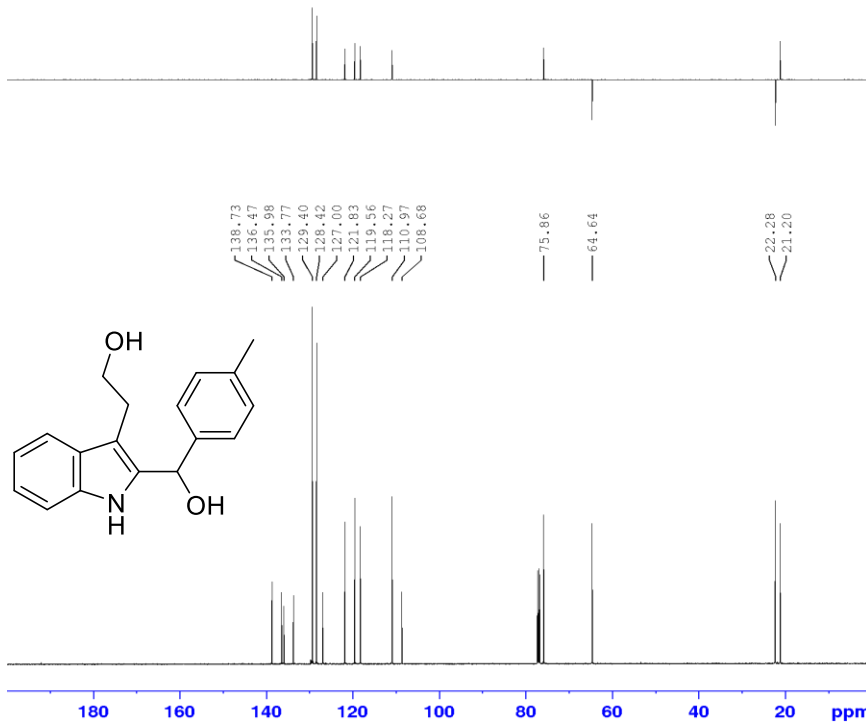

Current Data Parameters  
NAME LYL01045  
EXPNO 2  
PROCNO 1

F2 - Acquisition Parameters  
Date\_ 20230814  
Time\_ 5.50 h  
INSTRUM Avance  
PROBHD Z151574\_0127 (4  
PULPROG zgpg30  
TD 65536  
SOLVENT CDCl3  
NS 1024  
DS 4  
SWH 30120.482 Hz  
FIDRES 0.919204 Hz  
AQ 1.0878977 sec  
RG 101  
DW 16.600 usec  
DE 6.50 usec  
TE 298.0 K  
D1 2.00000000 sec  
D11 0.03000000 sec  
TD0 1  
SFO1 125.7703643 MHz  
NUC1 13C  
PO 3.00 usec  
P1 9.00 usec  
PLW1 113.54000092 W  
SFO2 500.1320005 MHz  
NUC2 1H  
CDPRG[2] waltz165  
PCPD2 80.00 usec  
PLW2 25.47599983 W  
PLW12 0.25476000 W  
PLW13 0.12814000 W

F2 - Processing parameters  
SI 32768  
SF 125.7578006 MHz  
WDW EM  
SSB 0  
LB 1.00 Hz  
GB 0  
PC 1.40

LYL01045

# <sup>1</sup>H-NMR (500 MHz, CDCl<sub>3</sub>)

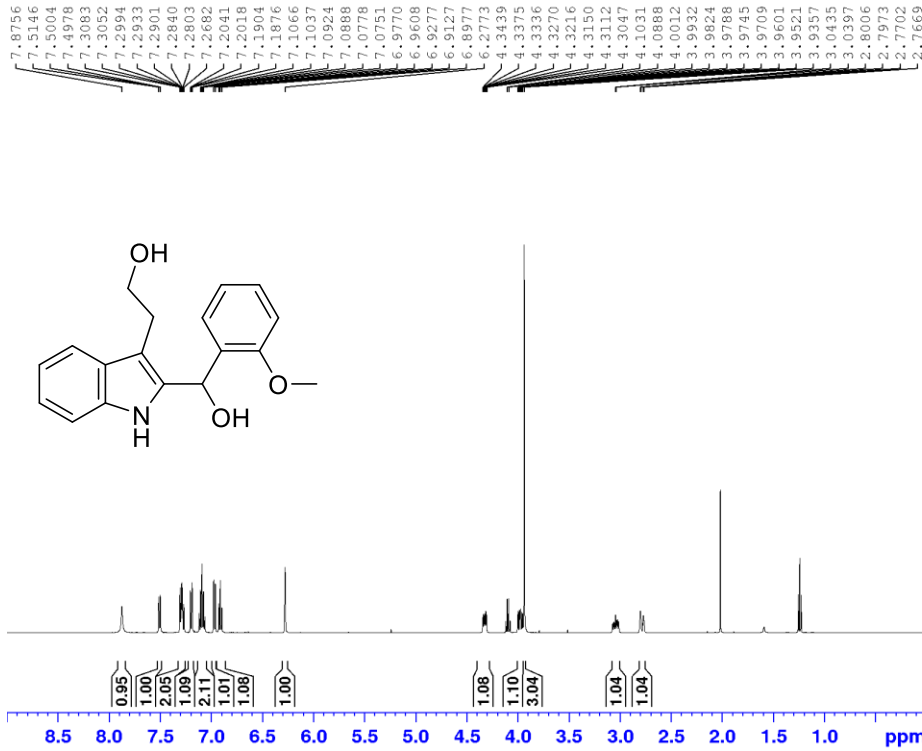

Current Data Parameters  
NAME LYL01046  
EXPNO 1  
PROCNO 1

F2 - Acquisition Parameters  
Date\_ 20230827  
Time 14.55 h  
INSTRUM Avance  
PROBHD Z151574\_0127 (zg30)  
PULPROG zg30  
TD 65536  
SOLVENT CDCl3  
NS 16  
DS 2  
SWH 10000.000 Hz  
FIDRES 0.305176 Hz  
AQ 3.2767999 sec  
RG 49.5238  
DW 50.000 usec  
DE 11.14 usec  
TE 295.6 K  
D1 1.00000000 sec  
TDO 1  
SFO1 500.1330883 MHz  
NUC1 1H  
P0 2.67 usec  
P1 8.00 usec  
PLW1 25.47599983 W

F2 - Processing parameters  
SI 65536  
SF 500.1330389 MHz  
WDW EM  
SSB 0  
LB 0.30 Hz  
GB 0  
PC 1.00

LYL01046

# <sup>13</sup>C-NMR (125 MHz, CDCl<sub>3</sub>)

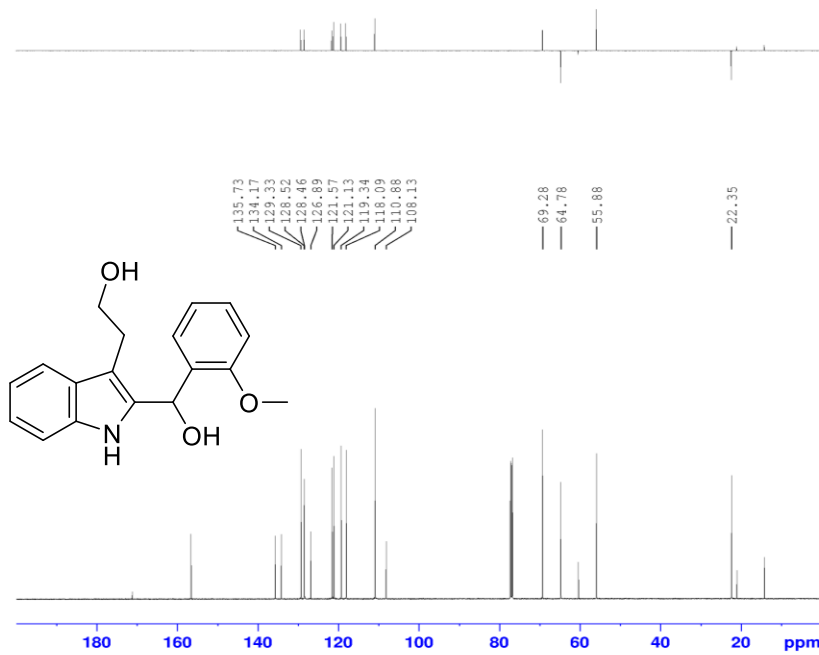

Current Data Parameters  
NAME LYL01046  
EXPNO 2  
PROCNO 1

F2 - Acquisition Parameters  
Date\_ 20230827  
Time 15.50 h  
INSTRUM Avance  
PROBHD Z151574\_0127 (zgpg30)  
PULPROG zgpg30  
TD 65536  
SOLVENT CDCl3  
NS 1024  
DS 4  
SWH 30120.482 Hz  
FIDRES 0.919204 Hz  
AQ 1.0878977 sec  
RG 101  
DW 16.600 usec  
DE 6.50 usec  
TE 296.7 K  
D1 2.00000000 sec  
D11 0.03000000 sec  
TDO 1  
SFO1 125.7703643 MHz  
NUC1 13C  
P0 3.00 usec  
P1 9.00 usec  
PLW1 113.54000092 W  
SFO2 500.1320005 MHz  
NUC2 1H  
CPDPRG2 waltz65  
PCPD2 80.00 usec  
PLW2 25.47599983 W  
PLW12 0.25476000 W  
PLW13 0.12814000 W

F2 - Processing parameters  
SI 32768  
SF 125.7577987 MHz  
WDW EM  
SSB 0  
LB 1.00 Hz  
GB 0  
PC 1.40

LYL01046

# <sup>1</sup>H-NMR (500 MHz, CDCl<sub>3</sub>)

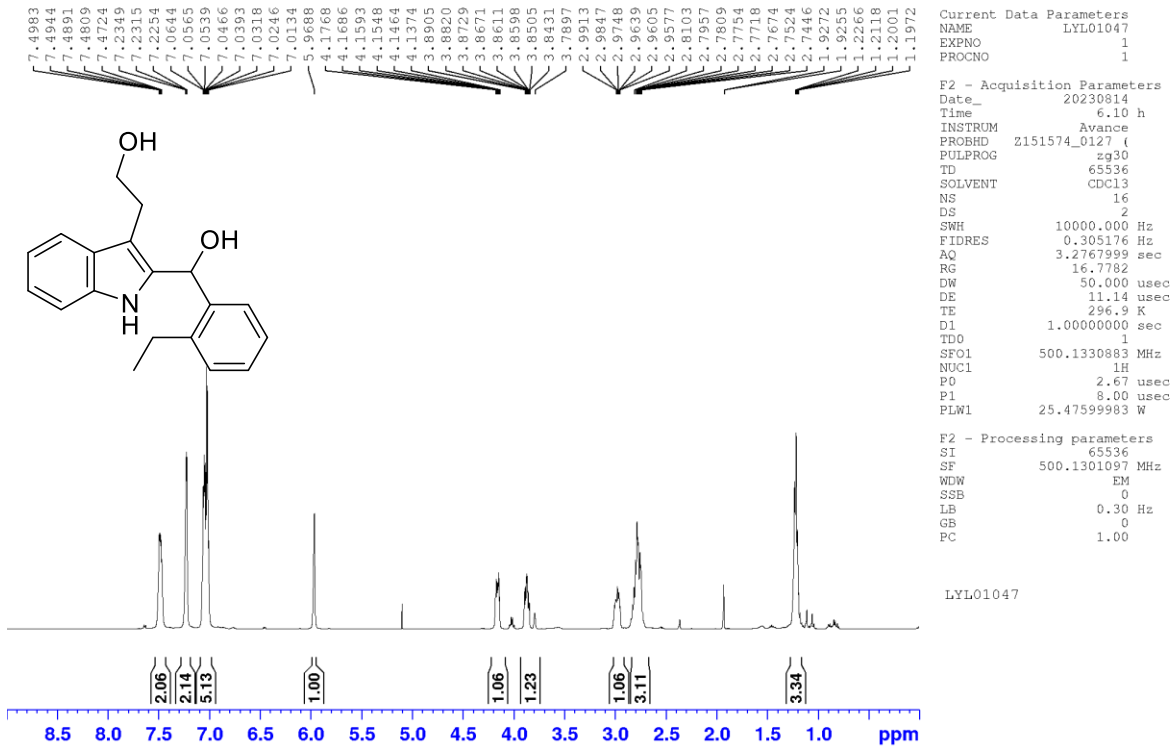

# <sup>13</sup>C-NMR (125 MHz, CDCl<sub>3</sub>)

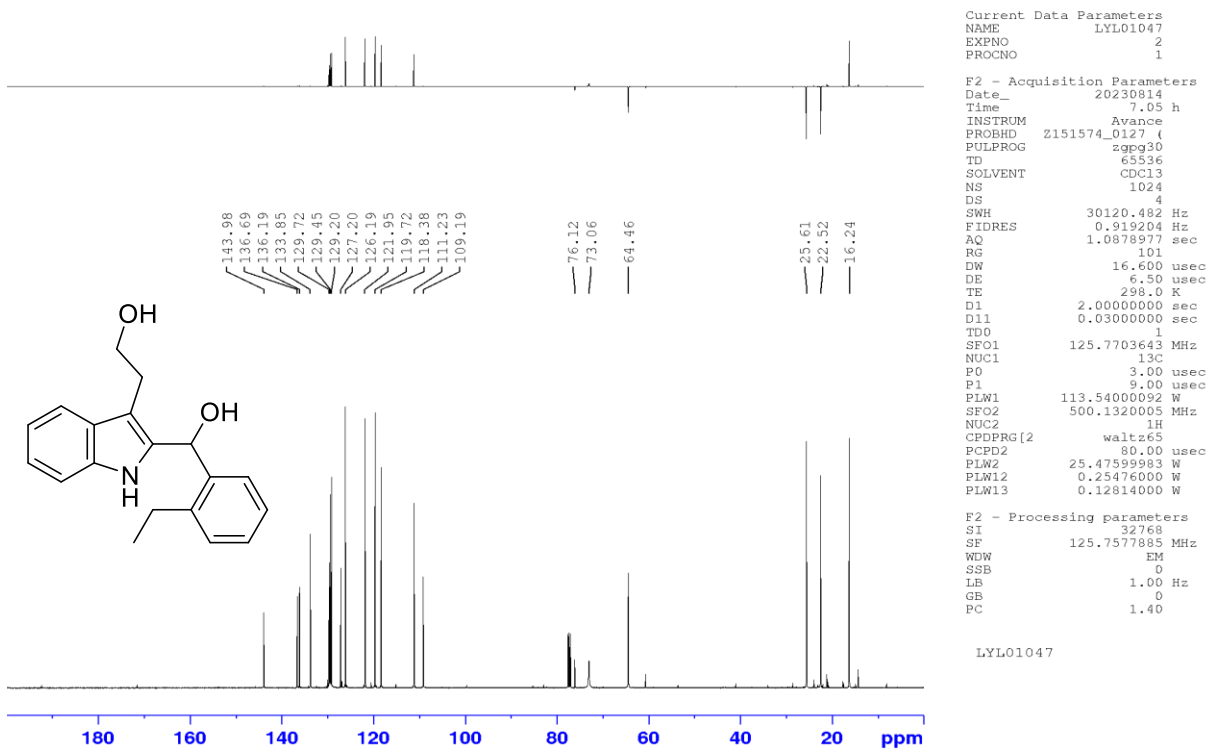

# <sup>1</sup>H-NMR (500 MHz, CDCl<sub>3</sub>)

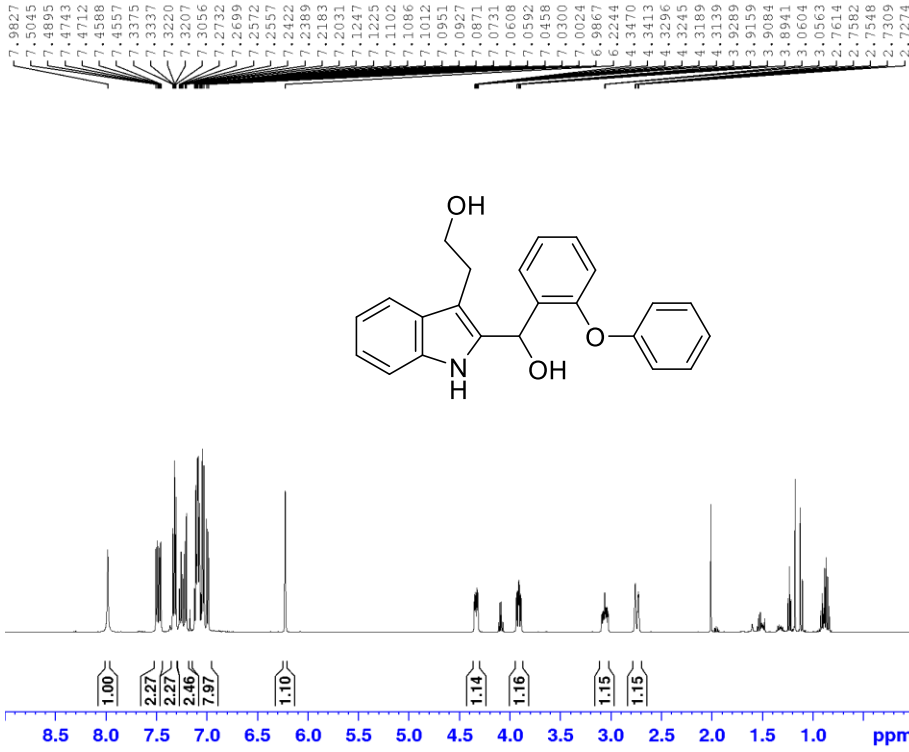

# <sup>13</sup>C-NMR (125 MHz, CDCl<sub>3</sub>)

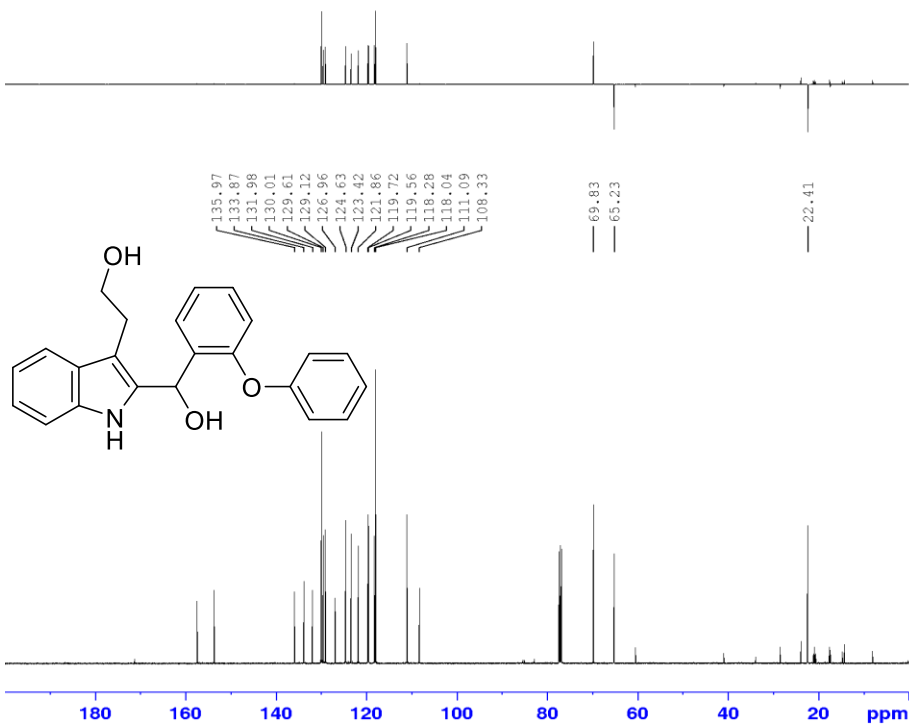

# <sup>1</sup>H-NMR (500 MHz, CDCl<sub>3</sub>)

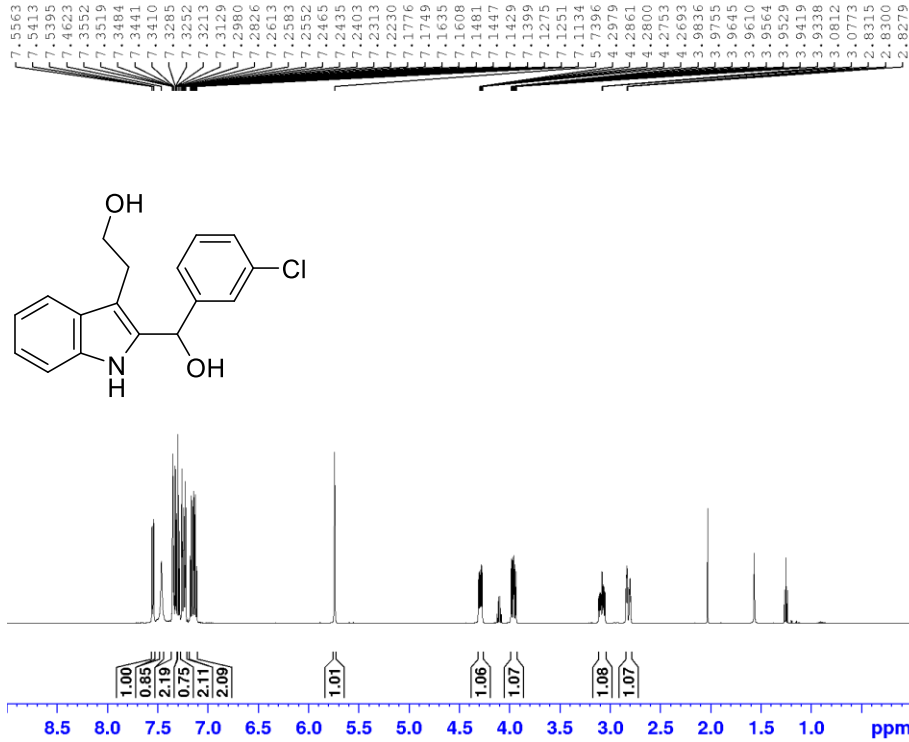

Current Data Parameters  
NAME LYL01053  
EXPNO 1  
PROCNO 1

F2 - Acquisition Parameters  
Date\_ 20230906  
Time 14.22 h  
INSTRUM Avance  
PROBHD Z151574\_0127 ( )  
PULPROG zg30  
TD 65536  
SOLVENT CDCl3  
NS 16  
DS 2  
SWH 10000.000 Hz  
FIDRES 0.305176 Hz  
AQ 3.2767999 sec  
RG 101  
DW 50.000 usec  
DE 11.14 usec  
TE 296.2 K  
D1 1.00000000 sec  
TDO  
SFO1 500.1330883 MHz  
NUC1 1H  
P0 2.67 usec  
P1 8.00 usec  
PLW1 25.47599983 W

F2 - Processing parameters  
SI 65536  
SF 500.1300257 MHz  
WDW EM  
SSB 0  
LB 0.30 Hz  
GB 0  
PC 1.00

LYL01053

# <sup>13</sup>C-NMR (125 MHz, CDCl<sub>3</sub>)

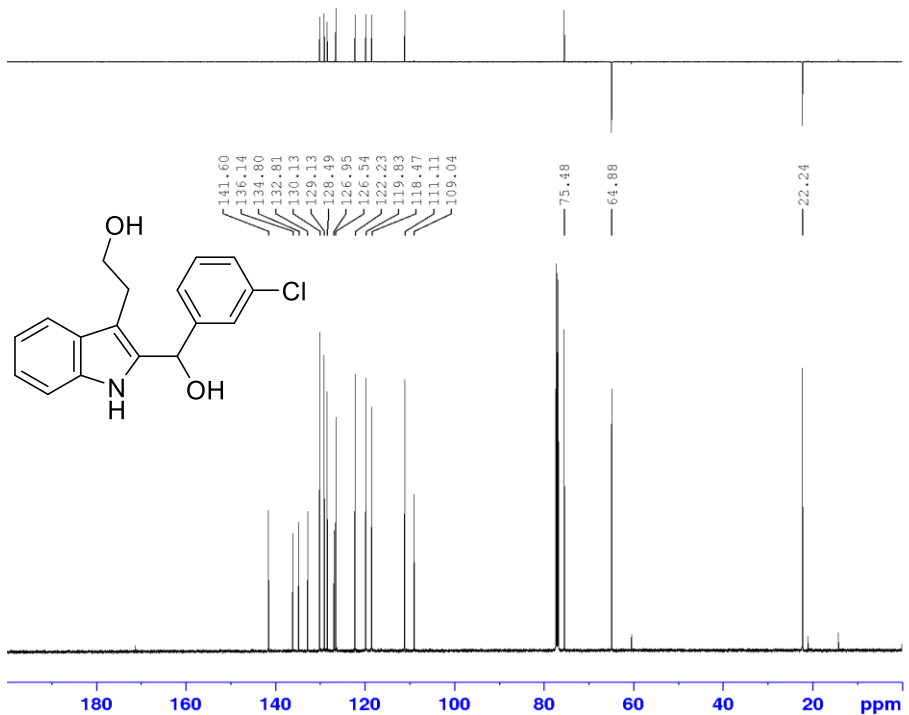

Current Data Parameters  
NAME LYL01053  
EXPNO 2  
PROCNO 1

F2 - Acquisition Parameters  
Date\_ 20230906  
Time 15.17 h  
INSTRUM Avance  
PROBHD Z151574\_0127 ( )  
PULPROG zgpg30  
TD 65536  
SOLVENT CDCl3  
NS 1024  
DS 4  
SWH 30120.482 Hz  
FIDRES 0.919204 Hz  
AQ 1.0878977 sec  
RG 101  
DW 16.600 usec  
DE 6.50 usec  
TE 297.4 K  
D1 2.00000000 sec  
D11 0.03000000 sec  
TDO 1  
SFO1 125.7703643 MHz  
NUC1 13C  
P0 3.00 usec  
P1 9.00 usec  
PLW1 113.54000092 W  
SFO2 500.1320005 MHz  
NUC2 1H  
CPDPRG[2] waltz65  
PCPD2 80.00 usec  
PLW2 25.47599983 W  
PLW12 0.25476000 W  
PLW13 0.12814000 W

F2 - Processing parameters  
SI 32768  
SF 125.7577885 MHz  
WDW EM  
SSB 0  
LB 1.00 Hz  
GB 0  
PC 1.40

LYL01053

# <sup>1</sup>H-NMR (500 MHz, CDCl<sub>3</sub>)

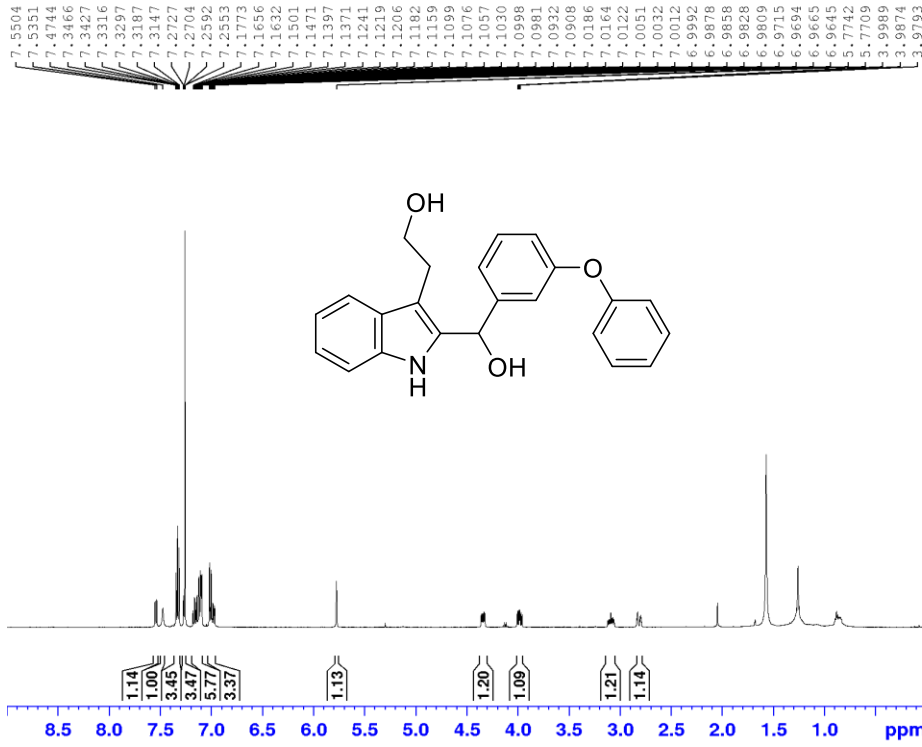

Current Data Parameters  
NAME LYL01060  
EXPNO 1  
PROCNO 1

F2 - Acquisition Parameters  
Date\_ 20230919  
Time 15.31 h  
INSTRUM Avance  
PROBHD Z151574\_0127 ( (   
PULPROG zg30  
TD 65536  
SOLVENT CDCl3  
NS 16  
DS 2  
SWH 10000.000 Hz  
FIDRES 0.305176 Hz  
AQ 3.2767999 sec  
RG 101  
DW 50.000 usec  
DE 11.14 usec  
TE 296.7 K  
D1 1.00000000 sec  
TDO 1  
SFO1 500.1330883 MHz  
NUC1 1H  
PO 2.67 usec  
P1 8.00 usec  
PLW1 25.47599983 W

F2 - Processing parameters  
SI 65536  
SF 500.1300125 MHz  
WDW EM  
SSB 0  
LB 0.30 Hz  
GB 0  
PC 1.00

LYL01060

# <sup>13</sup>C-NMR (125 MHz, CDCl<sub>3</sub>)

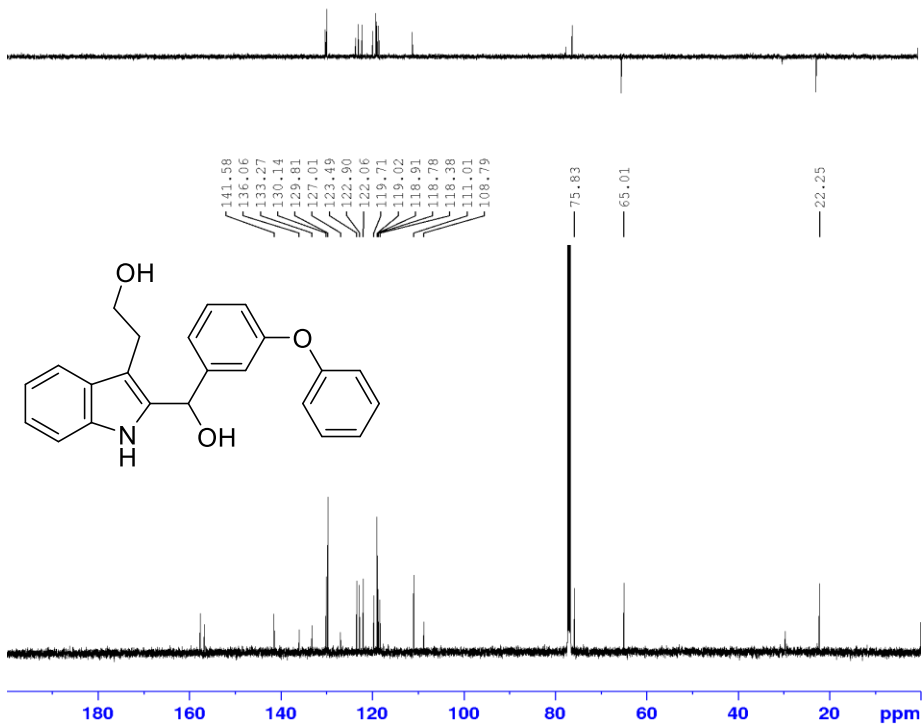

Current Data Parameters  
NAME LYL01060  
EXPNO 2  
PROCNO 1

F2 - Acquisition Parameters  
Date\_ 20230919  
Time 16.39 h  
INSTRUM Avance  
PROBHD Z151574\_0127 ( (   
PULPROG zgpg30  
TD 65536  
SOLVENT CDCl3  
NS 1280  
DS 4  
SWH 30120.482 Hz  
FIDRES 0.919204 Hz  
AQ 1.0878977 sec  
RG 101  
DW 16.600 usec  
DE 6.30 usec  
TE 297.9 K  
D1 2.00000000 sec  
D11 0.03000000 sec  
TDO 1  
SFO1 125.7703643 MHz  
NUC1 13C  
PO 3.00 usec  
P1 9.00 usec  
PLW1 113.54000952 W  
SFO2 500.1320095 MHz  
NUC2 1H  
CPDPRG2 waltz65  
PCPD2 80.00 usec  
PLW2 25.47599983 W  
PLW12 0.25476000 W  
PLW13 0.12814000 W

F2 - Processing parameters  
SI 32768  
SF 125.7577895 MHz  
WDW EM  
SSB 0  
LB 1.00 Hz  
GB 0  
PC 1.40

LYL01060

# <sup>1</sup>H-NMR (500 MHz, CDCl<sub>3</sub>)

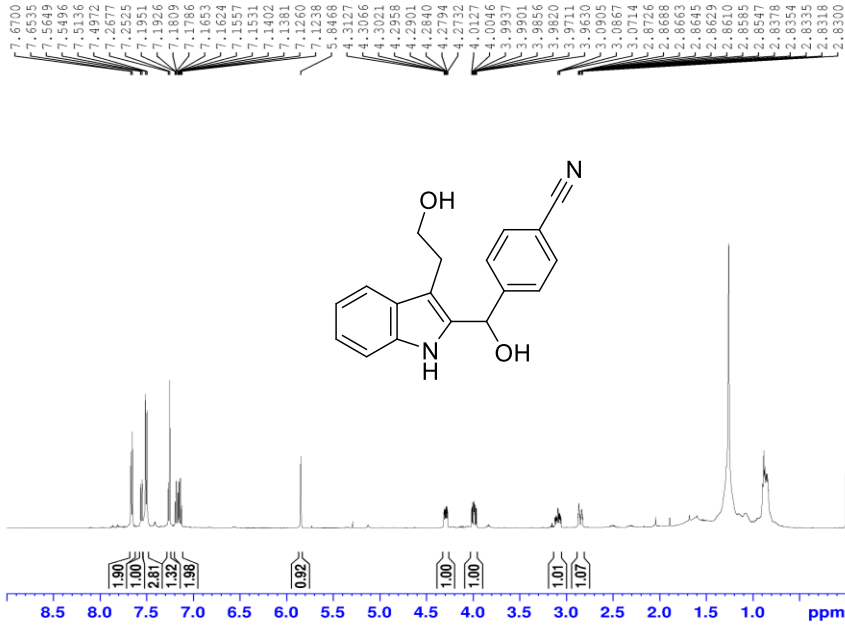

Current Data Parameters  
NAME LYL01059  
EXPNO 1  
PROCNO 1

F2 - Acquisition Parameters  
Date\_ 20230919  
Time 13.49 h  
INSTRUM Avance  
PROBHD Z151574\_0127 ( )  
PULPROG zg30  
TD 65536  
SOLVENT CDCl3  
NS 16  
DS 2  
SWH 10000.000 Hz  
FIDRES 0.305176 Hz  
AQ 3.2767999 sec  
RG 101  
DW 50.000 usec  
DE 11.14 usec  
TE 296.6 K  
D1 1.00000000 sec  
TDO 1  
SFO1 500.1330883 MHz  
NUC1 1H  
P0 2.67 usec  
P1 8.00 usec  
PLW1 25.47599983 W

F2 - Processing parameters  
SI 65536  
SF 500.1300159 MHz  
WDW EM  
SSB 0  
LB 0.30 Hz  
GB 0  
PC 1.00

LYL01059

# <sup>13</sup>C-NMR (125 MHz, CDCl<sub>3</sub>)

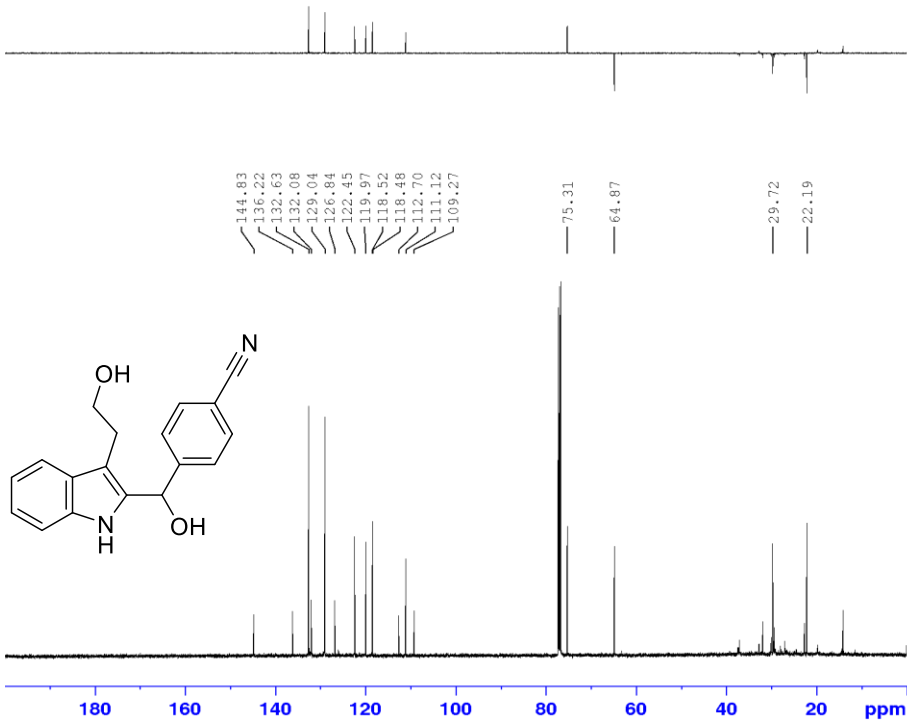

Current Data Parameters  
NAME LYL01059  
EXPNO 2  
PROCNO 1

F2 - Acquisition Parameters  
Date\_ 20230919  
Time 14.58 h  
INSTRUM Avance  
PROBHD Z151574\_0127 ( )  
PULPROG zgpg30  
TD 65536  
SOLVENT CDCl3  
NS 1280  
DS 4  
SWH 30120.482 Hz  
FIDRES 0.919204 Hz  
AQ 1.0878977 sec  
RG 101  
DW 16.600 usec  
DE 6.50 usec  
TE 297.8 K  
D1 2.00000000 sec  
D11 0.03000000 sec  
TDO 1  
SFO1 125.7703643 MHz  
NUC1 13C  
P0 3.00 usec  
P1 9.00 usec  
PLW1 113.54000092 W  
SFO2 500.1320005 MHz  
NUC2 1H  
CPDPRG2 waltz65  
PCPD2 80.00 usec  
PLM2 25.47599983 W  
PLW12 0.25476000 W  
PLW13 0.12814000 W

F2 - Processing parameters  
SI 32768  
SF 125.7577895 MHz  
WDW EM  
SSB 0  
LB 1.00 Hz  
GB 0  
FC 1.40

LYL01059

# <sup>1</sup>H-NMR (500 MHz, DMSO)

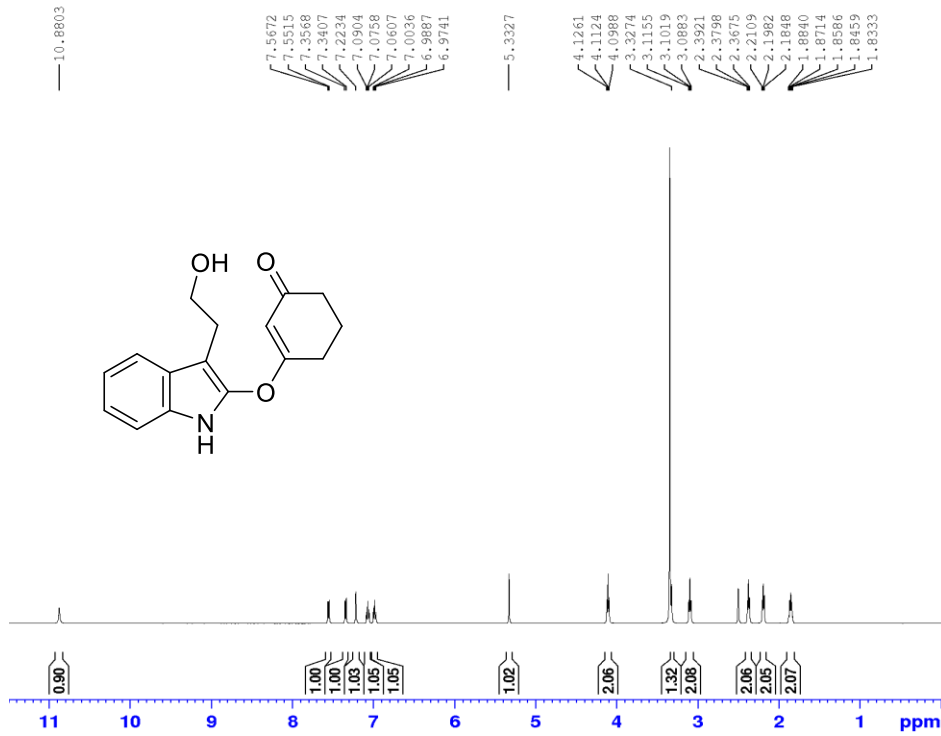

Current Data Parameters  
NAME YX01155-1  
EXPNO 1  
PROCNO 1

F2 - Acquisition Parameters  
Date\_ 20230609  
Time 17.19 h  
INSTRUM Avance  
PROBHD Z151574\_0127 ( )  
PULPROG zg30  
TD 65536  
SOLVENT DMSO  
NS 16  
DS 2  
SWH 10000.000 Hz  
FIDRES 0.305176 Hz  
AQ 3.2767999 sec  
RG 101  
DW 50.000 usec  
DE 11.14 usec  
TE 298.0 K  
D1 1.00000000 sec  
TD0 1  
SFO1 500.1330883 MHz  
NUC1 1H  
P0 2.67 usec  
P1 8.00 usec  
PLW1 25.47599983 W

F2 - Processing parameters  
SI 65536  
SF 500.1300000 MHz  
WDW EM  
SSB 0  
LB 0.30 Hz  
GB 0  
PC 1.00

YX01155-1

# <sup>13</sup>C-NMR (125 MHz, DMSO)

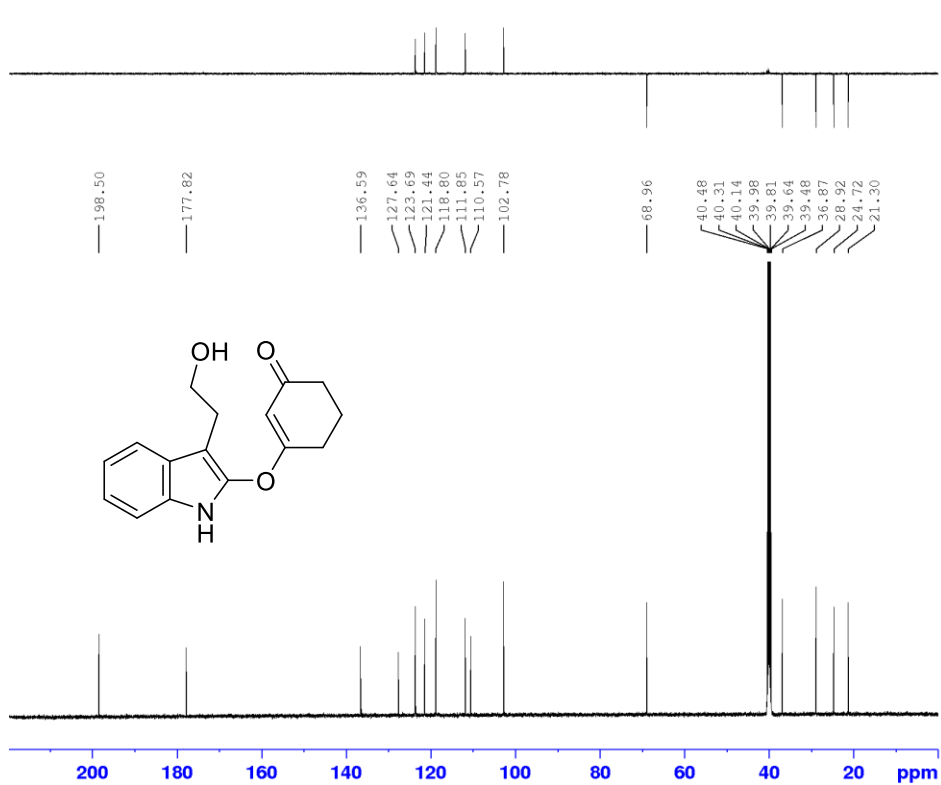

Current Data Parameters  
NAME YX01155-1  
EXPNO 2  
PROCNO 1

F2 - Acquisition Parameters  
Date\_ 20230610  
Time 4.34 h  
INSTRUM Avance  
PROBHD Z151574\_0127 ( )  
PULPROG zgpg30  
TD 65536  
SOLVENT DMSO  
NS 1024  
DS 4  
SWH 30120.482 Hz  
FIDRES 0.919204 Hz  
AQ 1.0878977 sec  
RG 101  
DW 16.600 usec  
DE 6.50 usec  
TE 298.0 K  
D1 2.00000000 sec  
D11 0.03000000 sec  
TD0 1  
SFO1 125.7703643 MHz  
NUC1 13C  
P0 3.00 usec  
P1 9.00 usec  
PLW1 113.54000092 W  
SFO2 500.1320005 MHz  
NUC2 1H  
CPDPRG2 waltz65  
PCPD2 80.00 usec  
PLW2 25.47599983 W  
PLW12 0.25476000 W  
PLW13 0.12814000 W

F2 - Processing parameters  
SI 32768  
SF 125.7577885 MHz  
WDW EM  
SSB 0  
LB 1.00 Hz  
GB 0  
PC 1.40

YX01155-1

# <sup>1</sup>H-NMR (500 MHz, CDCl<sub>3</sub>)

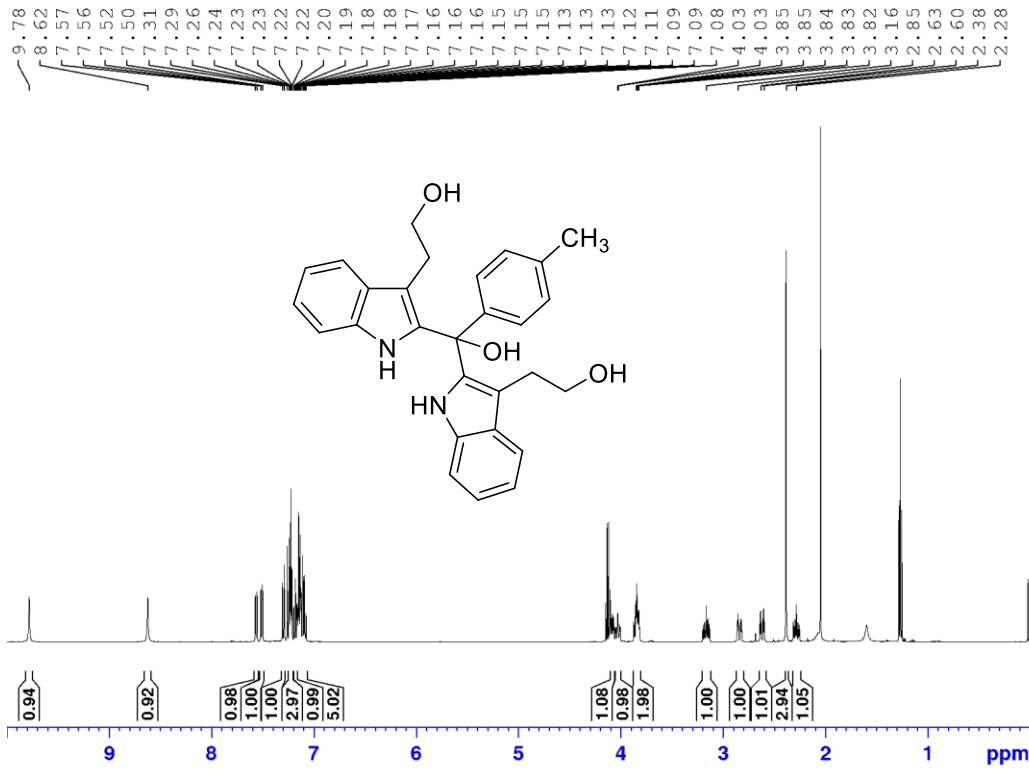

Current Data Parameters  
NAME LYL01030-2  
EXPNO 1  
PROCNO 1

F2 - Acquisition Parameters  
Date\_ 20230714  
Time 12.10 h  
INSTRUM Avance  
PROBHD Z151574\_0127 ( )  
PULPROG zg30  
TD 65536  
SOLVENT CDCl3  
NS 16  
DS 2  
SWH 10000.000 Hz  
FIDRES 0.305176 Hz  
AQ 3.2767999 sec  
RG 101  
DW 50.000 usec  
DE 11.14 usec  
TE 298.0 K  
D1 1.0000000 sec  
TDO 1  
SFO1 500.1330883 MHz  
NUC1 1H  
P0 2.67 usec  
P1 8.00 usec  
PLW1 25.47599983 W

F2 - Processing parameters  
SI 65536  
SF 500.1300114 MHz  
WDW EM  
SSB 0  
LB 0.30 Hz  
GB 0  
PC 1.00

# <sup>13</sup>C-NMR (125 MHz, CDCl<sub>3</sub>)

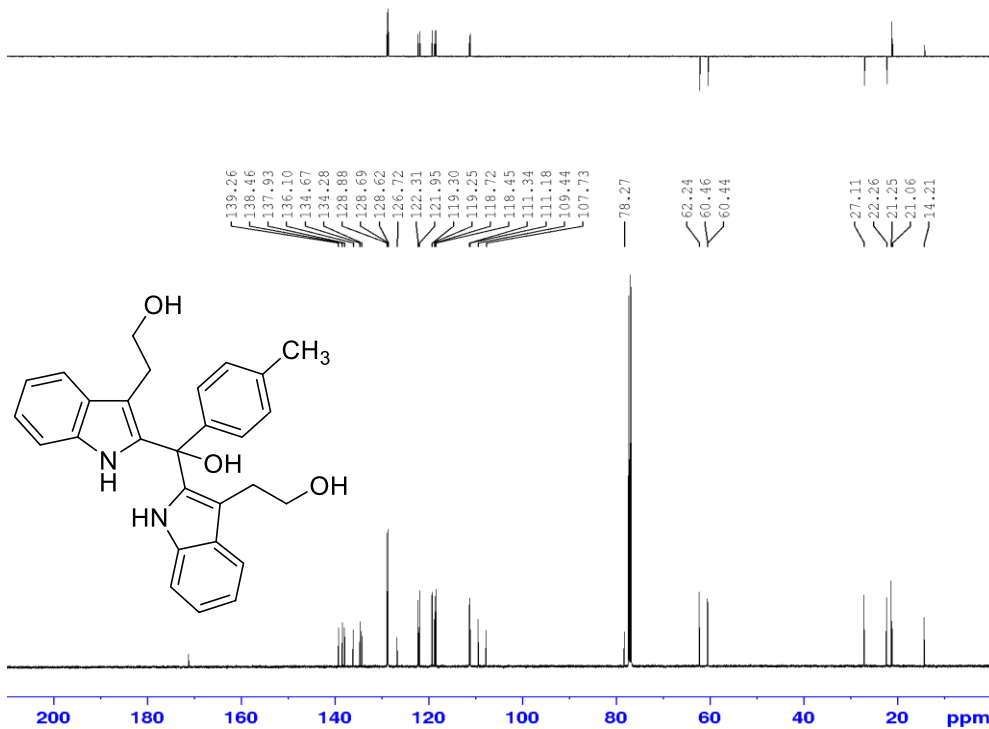

Current Data Parameters  
NAME LYL01030-2  
EXPNO 2  
PROCNO 1

F2 - Acquisition Parameters  
Date\_ 20230714  
Time 13.05 h  
INSTRUM Avance  
PROBHD Z151574\_0127 ( )  
PULPROG zgpg30  
TD 65536  
SOLVENT CDCl3  
NS 1024  
DS 4  
SWH 30120.482 Hz  
FIDRES 0.919204 Hz  
AQ 1.0878977 sec  
RG 101  
DW 16.600 usec  
DE 6.50 usec  
TE 298.0 K  
D1 2.0000000 sec  
D11 0.0300000 sec  
TDO 1  
SFO1 125.7703643 MHz  
NUC1 13C  
P0 3.00 usec  
P1 9.00 usec  
PLW1 113.54000092 W  
SFO2 500.1320005 MHz  
NUC2 1H  
CPDPRG(2) waltz65  
PCPD2 80.00 usec  
PLW2 25.47599983 W  
PLW12 0.25476000 W  
PLW13 0.12814000 W

F2 - Processing parameters  
SI 32768  
SF 125.7577885 MHz  
WDW EM  
SSB 0  
LB 1.00 Hz  
GB 0  
PC 1.40

LYL01030-2

### 3. Computational experiments data

#### Geometries and Energies for All Optimized Starting Materials, Transition States, Intermediates, and Target Materials

Single Point Energy  $E_{M06}$ ,  $\Delta$  ( $E_{M06}$ , in Hartree)

Zero-point correction ( $E_0$ , in Hartree)

Thermal correction to Enthalpy ( $H$ , in Hartree)

Thermal correction to Gibbs Free Energy ( $G$ , in Hartree)

Sum of electronic and zero-point Energies ( $E_{M06}+E_0$ , in Hartree)

Sum of electronic and thermal Enthalpies ( $E_{M06}+H$ , in Hartree)

Sum of electronic and thermal Free Energies ( $E_{M06}+G$ , in Hartree)

■ The single-point energies and solvent effects were computed at the M06/6-31+G(d) level

$\Delta$  The single-point energies and solvent effects were computed at the M06/6-311+G(2d,2p) level

Gaussian program 16 was employed for DFT calculations, and /M06-2X/def2-SVP level were used for geometry optimization and frequency calculations. The 6-311+G(2d,p) basis sets were employed in the calculations of triplet-singlet energy gaps. In the model substrate's reaction profile calculations, 6-31G(d,p) basis sets were used. Optimizations were conducted without constraint using the implicit solvation model (SMD)<sup>19</sup> in dichloromethane ( $\epsilon = 8.93$ ). Frequency analyses (at 298.15 K and 1 atm) were carried out to confirm that each structure is a minimum (no imaginary frequency) or a transition state (only one imaginary frequency). The searching for minimal energy crossing points was conducted using a modified version of Harvey's code<sup>20</sup> (sobMECP21) interfaced with Gaussian 16. The Gibbs free energies in dichloromethane ( $\Delta G$ ) were discussed throughout this Article unless otherwise specified. The single-point calculations were at M06-2X/def2-TZVP level. The SMD implicit solvent model was used to account for water's solvation effect. The 3D images of the calculated structures and the orbital diagrams were prepared using CYLView<sup>22</sup> or VMD.

## 1 Tryptophol

Standard orientation:

| Center Number | Atomic Number | Atomic Type | Coordinates (Angstroms) |           |           |
|---------------|---------------|-------------|-------------------------|-----------|-----------|
|               |               |             | X                       | Y         | Z         |
| 1             | 6             | 0           | -0.619500               | -0.290149 | 0.005676  |
| 2             | 6             | 0           | -1.485741               | 0.915736  | -0.024440 |
| 3             | 6             | 0           | -2.909779               | 0.741402  | -0.033323 |
| 4             | 6             | 0           | -3.433750               | -0.509071 | -0.014244 |
| 5             | 6             | 0           | -2.591872               | -1.681040 | 0.015025  |
| 6             | 6             | 0           | -1.239448               | -1.583847 | 0.024749  |
| 7             | 6             | 0           | 0.687833                | 0.103649  | 0.009428  |
| 8             | 6             | 0           | 0.751343                | 1.608437  | -0.018376 |
| 9             | 1             | 0           | -3.545006               | 1.638685  | -0.055652 |
| 10            | 1             | 0           | -4.522510               | -0.668000 | -0.020552 |
| 11            | 1             | 0           | -3.090159               | -2.661960 | 0.029246  |
| 12            | 1             | 0           | -0.591910               | -2.472288 | 0.047017  |
| 13            | 1             | 0           | 1.273614                | 2.006247  | 0.888077  |
| 14            | 1             | 0           | -0.998497               | 3.072654  | -0.060908 |
| 15            | 7             | 0           | -0.695068               | 2.028770  | -0.038651 |
| 16            | 6             | 0           | 1.951804                | -0.775685 | 0.036791  |
| 17            | 1             | 0           | 1.965297                | -1.352896 | 0.937649  |
| 18            | 1             | 0           | 1.947575                | -1.432683 | -0.807742 |
| 19            | 6             | 0           | 3.202442                | 0.121322  | -0.016911 |
| 20            | 1             | 0           | 3.233689                | 0.742226  | 0.853951  |
| 21            | 1             | 0           | 3.163249                | 0.735914  | -0.891920 |
| 22            | 8             | 0           | 4.374369                | -0.696923 | -0.061237 |
| 23            | 1             | 0           | 5.155188                | -0.138436 | -0.064968 |

Rotational constants (GHZ): 2.2183356 0.5197959 0.4239576

Standard basis: 6-31G(d) (6D, 7F)

There are 202 symmetry adapted cartesian basis functions of A symmetry.

There are 202 symmetry adapted basis functions of A symmetry.

202 basis functions, 380 primitive gaussians, 202 cartesian basis functions

43 alpha electrons 43 beta electrons

nuclear repulsion energy 643.9649887180 Hartrees.

NAtoms= 23 NActive= 23 NUniq= 23 SFac= 1.00D+00 NAtFMM= 60 NAOKFM=F

Big=F

Integral buffers will be 131072 words long.

Raffenetti 2 integral format.

Two-electron integral symmetry is turned on.

Nuclear repulsion after empirical dispersion term = 643.9429154510 Hartrees.

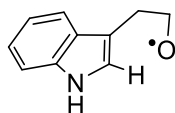

Standard orientation:

| Center Number | Atomic Number | Atomic Type | Coordinates (Angstroms) |           |           |
|---------------|---------------|-------------|-------------------------|-----------|-----------|
|               |               |             | X                       | Y         | Z         |
| 1             | 6             | 0           | -0.559404               | -0.290709 | 0.005266  |
| 2             | 6             | 0           | -1.423360               | 0.916831  | -0.024174 |
| 3             | 6             | 0           | -2.847733               | 0.745219  | -0.032111 |
| 4             | 6             | 0           | -3.374080               | -0.504252 | -0.012775 |
| 5             | 6             | 0           | -2.534423               | -1.677830 | 0.015837  |
| 6             | 6             | 0           | -1.181809               | -1.583222 | 0.024658  |
| 7             | 6             | 0           | 0.748681                | 0.100589  | 0.008167  |
| 8             | 6             | 0           | 0.815048                | 1.605256  | -0.019564 |
| 9             | 1             | 0           | -3.481260               | 1.643715  | -0.053944 |
| 10            | 1             | 0           | -4.463145               | -0.661101 | -0.018362 |
| 11            | 1             | 0           | -3.034574               | -2.657797 | 0.030319  |
| 12            | 1             | 0           | -0.535955               | -2.472901 | 0.046422  |
| 13            | 1             | 0           | 1.338689                | 2.001996  | 0.886568  |
| 14            | 1             | 0           | -0.932019               | 3.072817  | -0.060805 |
| 15            | 7             | 0           | -0.630570               | 2.028352  | -0.038833 |
| 16            | 6             | 0           | 2.010988                | -0.781160 | 0.034611  |
| 17            | 1             | 0           | 2.023985                | -1.358467 | 0.935416  |
| 18            | 1             | 0           | 2.004935                | -1.438083 | -0.809969 |
| 19            | 6             | 0           | 3.263302                | 0.113459  | -0.019865 |
| 20            | 1             | 0           | 3.296321                | 0.734235  | 0.851024  |
| 21            | 1             | 0           | 3.224694                | 0.728194  | -0.894800 |
| 22            | 8             | 0           | 4.433633                | -0.707019 | -0.065042 |

Rotational constants (GHZ): 2.2184832 0.5347696 0.4338695  
Standard basis: 6-31G(d) (6D, 7F)  
There are 200 symmetry adapted cartesian basis functions of A symmetry.  
There are 200 symmetry adapted basis functions of A symmetry.  
200 basis functions, 376 primitive gaussians, 200 cartesian basis functions  
43 alpha electrons 42 beta electrons  
nuclear repulsion energy 631.1210890369 Hartrees.  
NAtoms= 22 NActive= 22 NUniq= 22 SFac= 1.00D+00 NAtFMM= 60 NAOKFM=F  
Big=F  
Integral buffers will be 131072 words long.  
Raffenetti 2 integral format.  
Two-electron integral symmetry is turned on.  
Nuclear repulsion after empirical dispersion term = 631.0994529136 Hartrees.

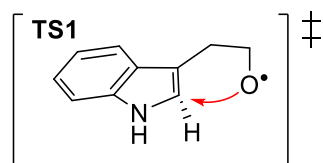

Input orientation:

| Center | Atomic | Atomic | Coordinates (Angstroms) |  |  |
|--------|--------|--------|-------------------------|--|--|
|--------|--------|--------|-------------------------|--|--|

| Number | Number | Type | X         | Y         | Z         |
|--------|--------|------|-----------|-----------|-----------|
| 1      | 6      | 0    | -0.483721 | 0.409009  | -0.558946 |
| 2      | 6      | 0    | -0.972741 | 1.111212  | 0.579850  |
| 3      | 6      | 0    | -2.118431 | 1.896574  | 0.527566  |
| 4      | 6      | 0    | -2.780477 | 1.975963  | -0.693982 |
| 5      | 6      | 0    | -2.307720 | 1.303700  | -1.838165 |
| 6      | 6      | 0    | -1.162808 | 0.526958  | -1.785462 |
| 7      | 6      | 0    | 0.688283  | -0.282103 | -0.154831 |
| 8      | 6      | 0    | 0.909662  | 0.057848  | 1.206991  |
| 9      | 1      | 0    | -2.479239 | 2.427778  | 1.403175  |
| 10     | 1      | 0    | -3.682417 | 2.576947  | -0.767292 |
| 11     | 1      | 0    | -2.851800 | 1.401404  | -2.773010 |
| 12     | 1      | 0    | -0.795653 | 0.009040  | -2.667195 |
| 13     | 1      | 0    | 1.511939  | -0.458437 | 1.938106  |
| 14     | 1      | 0    | -0.249449 | 1.169809  | 2.578025  |
| 15     | 7      | 0    | -0.110645 | 0.861327  | 1.626255  |
| 16     | 6      | 0    | 1.845227  | -0.749398 | -0.969534 |
| 17     | 1      | 0    | 2.259133  | -1.673784 | -0.551109 |
| 18     | 1      | 0    | 1.586129  | -0.922771 | -2.017520 |
| 19     | 6      | 0    | 2.813856  | 0.425319  | -0.789219 |
| 20     | 1      | 0    | 2.532501  | 1.216385  | -1.506574 |
| 21     | 1      | 0    | 3.856613  | 0.140499  | -1.008349 |
| 22     | 8      | 0    | 2.734169  | 0.867139  | 0.542900  |

Rotational constants (GHZ): 2.0133165 0.7437634 0.6045868  
Standard basis: 6-31G(d) (6D, 7F)  
200 basis functions, 376 primitive gaussians, 200 cartesian basis functions  
43 alpha electrons 42 beta electrons  
nuclear repulsion energy 669.6107434781 Hartrees.  
NAtoms= 22 NActive= 22 NUniq= 22 SFac= 1.00D+00 NAtFMM= 60 NAOKFM=F  
Big=F  
Integral buffers will be 131072 words long.  
Raffenetti 2 integral format.  
Two-electron integral symmetry is turned off.  
Nuclear repulsion after empirical dispersion term = 669.5883129015 Hartrees.  
Force inversion solution in PCM.

#### 4. X-ray crystal structure experiments data

**Experimental.** Single block crystals of **target molecules** were used as supplied. A suitable crystal with dimensions  $0.20 \times 0.15 \times 0.10 \text{ mm}^3$  was selected and mounted on a Bruker APEX-II CCD diffractometer. The crystal was kept at a steady  $T = 296.15 \text{ K}$  during data collection. The structure was solved with the ShelXT 2018/2 solution program using dual methods and by using Olex2 as the graphical interface. The model was refined with ShelXL 2018/3 using full matrix least squares minimisation on  $F^2$ .

##### Structure Quality Indicators

|                     |                                 |       |               |      |          |       |                            |       |       |        |
|---------------------|---------------------------------|-------|---------------|------|----------|-------|----------------------------|-------|-------|--------|
| <b>Reflections:</b> | d min (Mo)<br>2 $\theta$ =55.0° | 0.77  | $I/\sigma(I)$ | 21.5 | Rint     | 3.41% | Full 50.5°<br>99% to 55.0° | 99.9  |       |        |
| <b>Refinement:</b>  | Shift                           | 0.001 | Max Peak      | 0.2  | Min Peak | -0.4  | GooF                       | 1.039 | Flack | -.3(5) |

A block-shaped crystal with dimensions  $0.20 \times 0.15 \times 0.10 \text{ mm}^3$  was mounted. Data were collected using a Bruker APEX-II CCD diffractometer operating at  $T = 296.15 \text{ K}$ .

Data were measured using  $f$  and  $w$  scans using  $\text{MoK}_\alpha$  radiation. The maximum resolution that was achieved was  $Q = 27.484 (0.77 \text{ \AA})$ .

The unit cell was refined using SAINT (Bruker, V8.34A, after 2013) on 4339 reflections, 23% of the observed reflections.

Data reduction, scaling and absorption corrections were performed using SAINT (Bruker, V8.34A, after 2013). The final completeness is 99.80 % out to  $27.484^\circ$  in  $Q$ . A multi-scan absorption correction was performed using SADABS-2014/5 (Bruker, 2014/5) was used for absorption correction.  $wR_2(\text{int})$  was 0.0371 before and 0.0319 after correction. The Ratio of minimum to maximum transmission is 0.9501. The  $l/2$  correction factor is 0.00150. The absorption coefficient  $m$  of this material is  $0.099 \text{ mm}^{-1}$  at this wavelength ( $l = 0.71073 \text{ \AA}$ ) and the minimum and maximum transmissions are 0.708 and 0.746.

The structure was solved and the space group  $P2_12_12_1$  (# 19) determined by the ShelXT 2018/2 structure solution program using using dual methods and refined by full matrix least squares minimisation on  $F^2$  using version 2018/3 of ShelXL 2018/3. All non-hydrogen atoms were refined anisotropically. Hydrogen atom positions were calculated geometrically and refined using the riding model. Hydrogen atom positions were calculated geometrically and refined using the riding model.

\_exptl\_absorpt\_process\_details: SADABS-2014/5 (Bruker,2014/5) was used for absorption correction. $wR_2(\text{int})$  was 0.0371 before and 0.0319 after correction. The Ratio of minimum to maximum transmission is 0.9501. The  $l/2$  correction factor is 0.00150.

## X-ray crystal structure data (1)

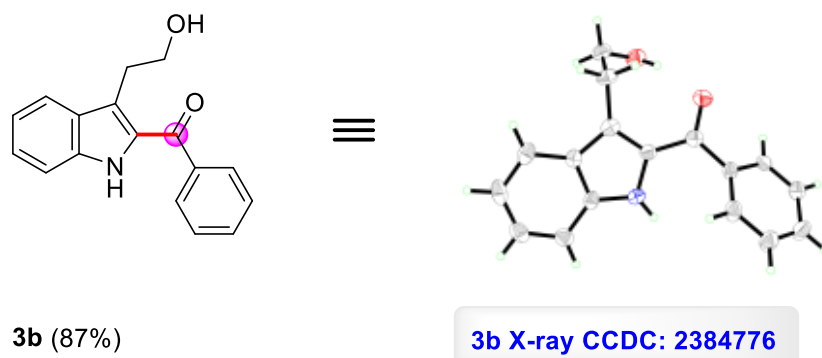

*Figure S4.* X-ray crystal structure of **3b** product.

## Datablock: a

Bond precision: C-C = 0.0097 Å Wavelength=0.71073

Cell: a=15.269(5) b=10.765(3) c=16.567(5)

Temperature: alpha=90 beta=90 gamma=90

296 K

Volume Space 2723.1(14) 2723.0(14)

group Hall group Pna21P2c - O<sub>2</sub> Pna21P2c-2n

Moiety formula 2nC<sub>17</sub>H<sub>15</sub>N C<sub>17</sub>H<sub>15</sub>NO<sub>2</sub>

Sum formula C<sub>17</sub>H<sub>15</sub>N O<sub>2</sub> C<sub>17</sub>H<sub>15</sub>NO<sub>2</sub>

Mr 265.30 265.30

Dx,g cm<sup>-3</sup> 1.294 1.294

Z 8 8

Mu (mm<sup>-1</sup>) 0.085 0.085

F000 1120.0 1120.0

F000' 1120.50

h,k,lmax 19,14,21 19,14,21

Nref 6366[ 3293] 5800

Tmin,Tmax 0.985,0.992 0.568,0.746

Tmin' 0.983

Correction method= # Reported T Limits: Tmin=0.568 Tmax=0.746 AbsCorr = MULTI-SCAN

Data completeness= 1.76/0.91 Theta(max)= 27.658

R(reflections)= 0.0732( 3340)

wR2(reflections)= 0.1984( 5800)

S = 1.102 Npar= 363

The following ALERTS were generated. Each ALERT has the format

test-name\_ALERT\_alert-type\_alert-level.

Click on the hyperlinks for more details of the test.
